# Supplementary material
Source: PubMed Central journal article supplement (PMC10278132)
Supplement: jo2c02030_si_001.pdf [file jo2c02030_si_001.pdf]

*Supporting Information for*

# **Dehaloperoxidase Catalyzed Stereoselective Synthesis of Cyclopropanol Esters**

Mary G. Siriboe,<sup>a</sup> David A. Vargas,<sup>a,b</sup> and Rudi Fasan<sup>\*,a</sup>

<sup>a</sup> *Department of Chemistry, University of Rochester, 120 Trustee Road, Rochester, New York, 14627, United States*

<sup>b</sup> *Current affiliation: Process Research and Development, Merck & Co., Inc., Rahway, NJ, 07065, USA.*

*Correspondence should be addressed to R.F. (rfasan@ur.rochester.edu)*

## **Table of Contents**

|                           |         |
|---------------------------|---------|
| Supplementary Tables      | S2-S4   |
| Supplementary Figures     | S5-S24  |
| Supplementary Scheme      | S25     |
| Compound Characterization | S26-S39 |
| NMR Spectra               | S40-S79 |
| Reference                 | S80     |

**Table S1.** Tables with Whole Cells Reaction with DHP mutants H55X, V59A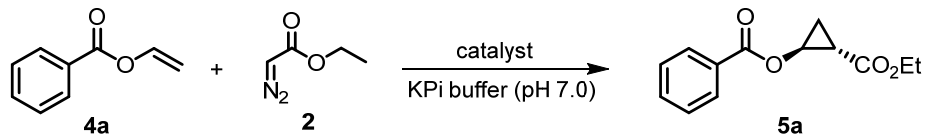

| Entry | Catalyst        | OD <sub>600</sub> | AY (%) | dr <sub>trans</sub> | er <sub>trans</sub> |
|-------|-----------------|-------------------|--------|---------------------|---------------------|
| 1     | DHP (H55A,V59A) | 10                | 12     | 99.5:0.5            | 99.5:0.5            |
| 2     | DHP (H55A,V59A) | 20                | 14     | 99.5:0.5            | 99.5:0.5            |
| 3     | DHP (H55A,V59A) | 40                | 17     | 99.5:0.5            | 99.5:0.5            |
| 4     | DHP (H55A,V59A) | 60                | 21     | 99.5:0.5            | 99.5:0.5            |
| 5     | DHP (H55A,V59A) | 80                | 16     | 99.5:0.5            | 99.5:0.5            |
| 6     | DHP (H55A,V59A) | 100               | 18     | 99.5:0.5            | 99.5:0.5            |
| 7     | DHP (H55G,V59A) | 20                | 1%     | 99.5:0.5            | n.d                 |
| 8     | DHP (H55G,V59A) | 40                | 3%     | 99.5:0.5            | n.d                 |
| 9     | DHP (H55G,V59A) | 60                | 4%     | 99.5:0.5            | n.d                 |
| 10    | DHP (H55V,V59A) | 20                | 0%     | -                   | -                   |

<sup>[a]</sup> Reaction Conditions: 20 mM Catalyst, 10 mM vinyl benzoate, 20 mM EDA, 10 mM dithionite, 5% EtOH, anaerobic 4 h

**Table S2.** Optimization of the reaction conditions for DHP(H55A,V59A) catalyzed cyclopropanation of vinyl benzoate with EDA. Reaction Conditions: 5% organic co-solvent in KPi buffer (pH 7), 10 mM sodium dithionite, anaerobic conditions, 4 hours.

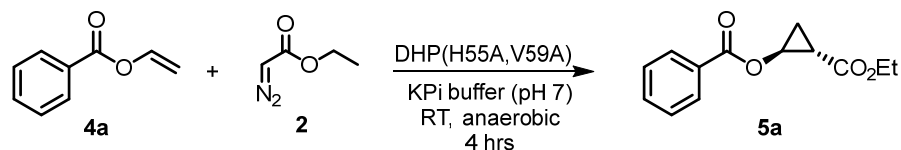

| No.             | Cat. Loading | Sub. Con. (mM) | EDA Con.(mM) | Organic Co-solvent | AY (%) | pH | dr <sub>trans</sub> | er <sub>trans</sub> |
|-----------------|--------------|----------------|--------------|--------------------|--------|----|---------------------|---------------------|
| 1               | 20           | 10             | 20           | EtOH               | 35     | 7  | 99.5:0.5            | 99.5:0.5            |
| 2               | 20           | 5              | 10           | EtOH               | 36     | 7  | 99.5:0.5            | 99.5:0.5            |
| 3               | 20           | 2.5            | 5            | EtOH               | 53     | 7  | 99.5:0.5            | 99.5:0.5            |
| 4               | 20           | 10             | 20           | EtOH               | 26     | 6  | 99.5:0.5            | 99.5:0.5            |
| 5               | 20           | 10             | 20           | EtOH               | 25     | 8  | 99.5:0.5            | 99.5:0.5            |
| 6 <sup>a</sup>  | 20           | 10             | 20           | EtOH               | 30     | 9  | 99.5:0.5            | 99.5:0.5            |
| 7               | 40           | 10             | 20           | EtOH               | 29     | 7  | 99.5:0.5            | 99.5:0.5            |
| 8               | 60           | 10             | 20           | EtOH               | 26     | 7  | 99.5:0.5            | 99.5:0.5            |
| 9               | 20           | 10             | 20           | EtOH               | 23     | 7  | 99.5:0.5            | 99.5:0.5            |
| 10              | 20           | 5              | 10           | EtOH               | 24     | 7  | 99.5:0.5            | 99.5:0.5            |
| 11              | 20           | 1.25           | 2.5          | EtOH               | 51     | 7  | 99.5:0.5            | 99.5:0.5            |
| 12              | 20           | 5              | 2.5          | EtOH               | 55     | 7  | 99.5:0.5            | 99.5:0.5            |
| 13              | 20           | 2.5            | 5            | EtOH               | 17     | 7  | 99.5:0.5            | 99.5:0.5            |
| 14              | 20           | 2.5            | 5            | MeCN               | 40     | 7  | 99.5:0.5            | 99.5:0.5            |
| 15              | 20           | 2.5            | 5            | DMSO               | 44     | 7  | 99.5:0.5            | 99.5:0.5            |
| 16              | 20           | 2.5            | 5            | MeOH               | 67     | 7  | 99.5:0.5            | 99.5:0.5            |
| 17 <sup>c</sup> | 20           | 2.5            | 5            | MeOH               | 45     | 7  | 99.5:0.5            | 99.5:0.5            |
| 18 <sup>c</sup> | 20           | 1.25           | 2.5          | MeOH               | 53     | 7  | 99.5:0.5            | 99.5:0.5            |
| 19              | 20           | 5              | 2.5          | MeOH               | 66     | 9  | 99.5:0.5            | 99.5:0.5            |
| 20              | 20           | 2.5            | 5            | MeOH               | 19     | 9  | 99.5:0.5            | 99.5:0.5            |
| 21              | 20           | 2.5            | 5            | MeOH               | 27     | 7  | 99.5:0.5            | 99.5:0.5            |
| 22 <sup>d</sup> | 20           | 2.5            | 5            | MeOH               | 80     | 7  | 99.5:0.5            | 99.5:0.5            |
| 23              | 20           | 2.5            | 5            | Isopropanol        | 30     | 7  | 99.5:0.5            | 99.5:0.5            |
| 24              | 20           | 2.5            | 5            | THF                | 72     | 7  | 99.5:0.5            | 99.5:0.5            |
| 25              | 20           | 2.5            | 5            | DMF                | 17     | 7  | 99.5:0.5            | 99.5:0.5            |
| 26 <sup>d</sup> | 20           | 2.5            | 5            | MeOH               | 80     | 7  | 99.5:0.5            | 99.5:0.5            |
| 27 <sup>d</sup> | 20           | 2.5            | 10           | MeOH               | >99    | 7  | 99.5:0.5            | 99.5:0.5            |

<sup>[a]</sup>Sodium borate buffer at pH 9. <sup>[b]</sup> at 0°C <sup>[c]</sup> slow addition of EDA <sup>[d]</sup> 10% organic co-solvent

**Table S3.** Sequence of the oligonucleotides used for the preparation of the dehaloperoxidase variants.

| <b>Primer</b> | <b>Sequence</b>                   |
|---------------|-----------------------------------|
| DHP Wt Fwd    | AAAAACATATGGGTTTCAAGCAAGACATCGCGA |
| DHP Wt Rev    | AAAAACTCGAGTTTCATACCCGCGCTGCT     |
| XhoI          | GGCTTTGTTAGCAGCCGGAT              |
| DHP F24A Fwd  | CATTTTCCTGGCGGCGCTGAATAAATAC      |
| DHP F35A Fwd  | CGTCGTTACGCGAAGAAGACTATG          |
| DHP Y38A Fwd  | CTTCAAGAACGCGGTGGGTAAAAG          |
| DHP H55A Fwd  | GAAATTCGGCGATGCCACCGAGAAG         |
| DHP M63A Fwd  | GTTTAACCTGGCGATGGAAGTTG           |
| DHP V59A Fwd  | CACCGAGAAGGCGTTTAACCTG            |
| DHP L100A Fwd | CTTCGAGAAAGCGTTTGTGGCG            |

**Figure S1.** Spectrophotometric redox potential determination for wild-type DHP and the DHP variants. Representative UV-vis spectra during the determination of the  $\text{Fe}^{3+/2+}$  reduction and Nerst plot.

A) Wild-type DHP (Dye: Bindschedler's green). UV-vis spectra (top) and Nerst plot generated from UV-vis spectra (bottom). The calculated redox potential is  $216 \pm 5$  mV ( $n=3$ ).

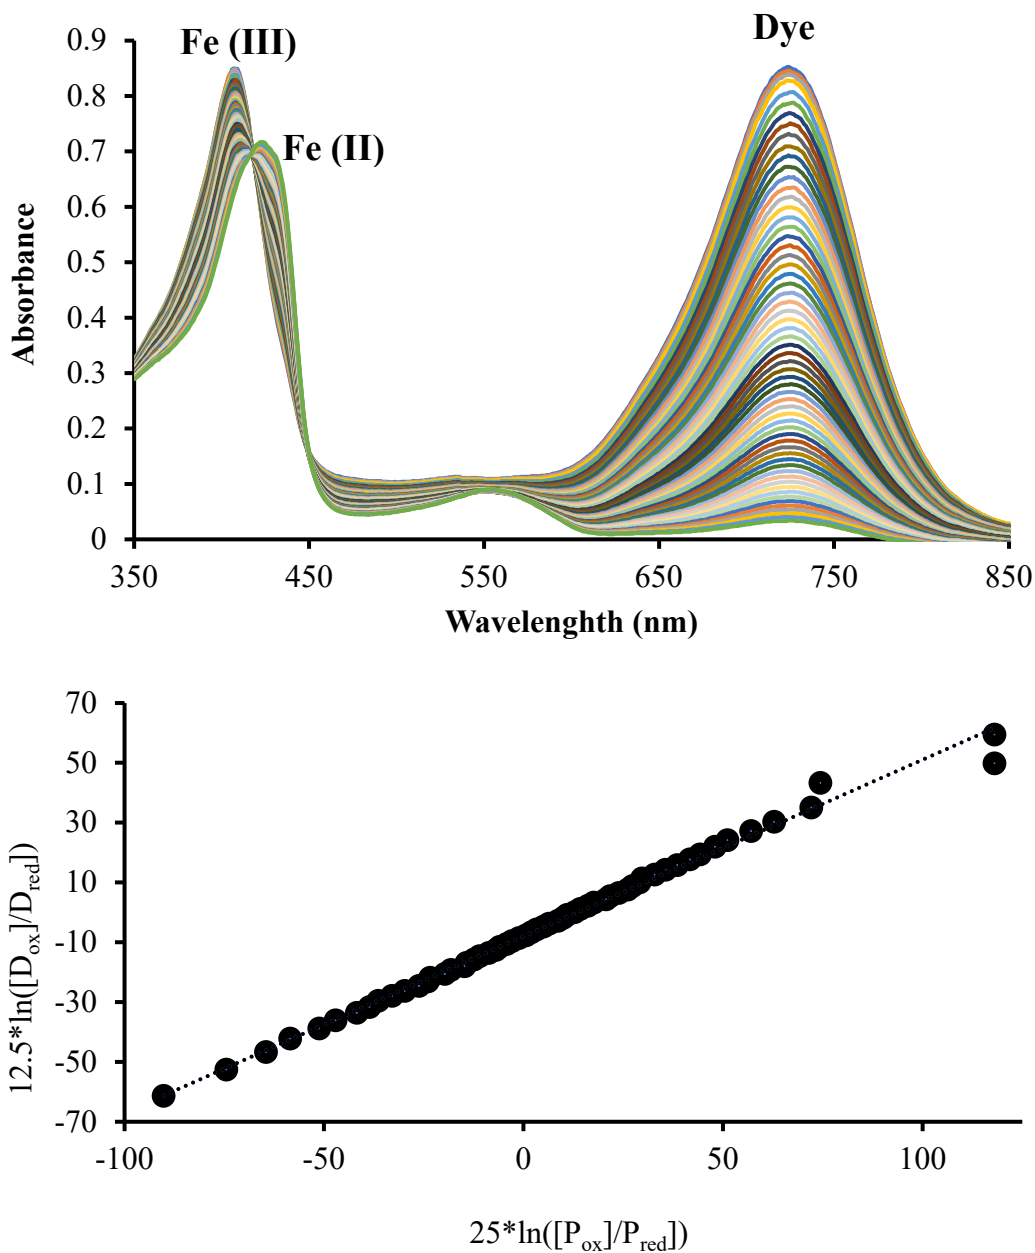

B) DHP(H55A) variant (Dye: Bindschedler's green). No reduction of the protein was observed while the dye was reduced, indicating that the  $E^{\circ} \text{Fe}^{3+}/\text{Fe}^{2+}$  of the metalloprotein must be  $>300$  mV.

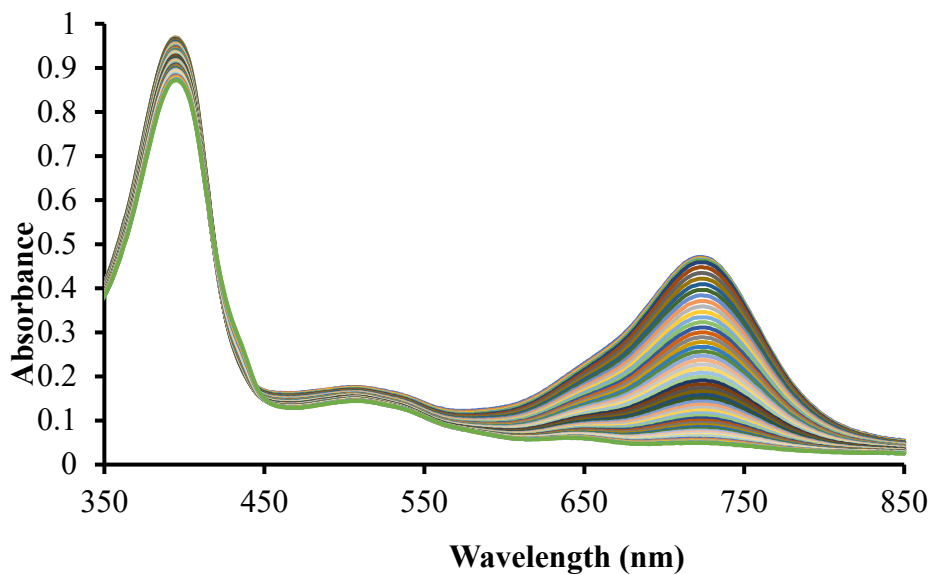

C) DHP(H55A,V59A) variant (Dye: Bindschedler's green). No reduction of the protein was observed while the dye was reduced, indicating that the  $E^{\circ} \text{Fe}^{3+}/\text{Fe}^{2+}$  of the metalloprotein must be  $>300$  mV.

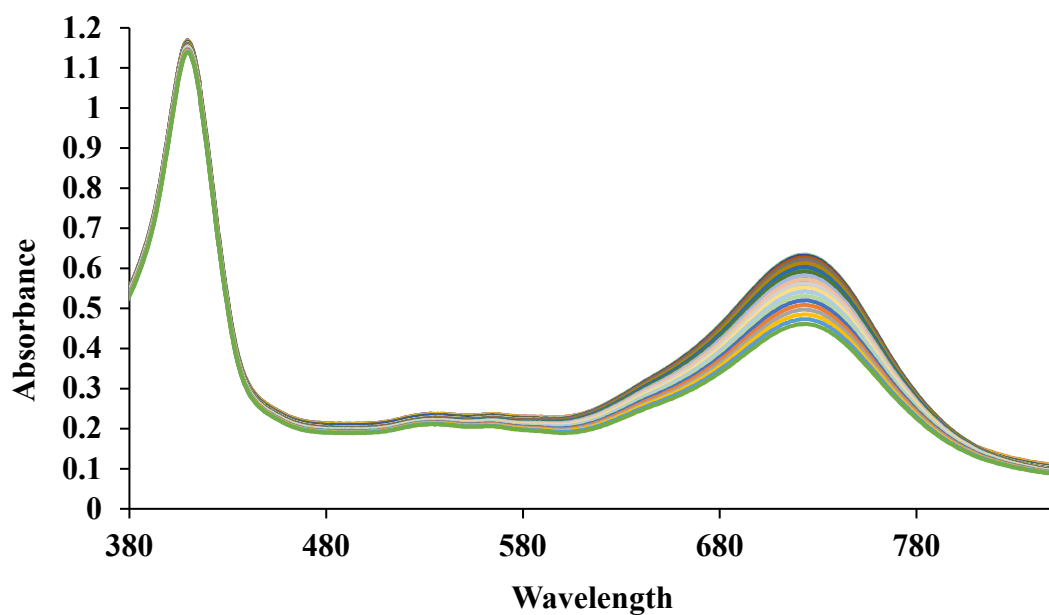

**Figure S2.** Kinetic analysis of DHP(H55A,V59A)-catalyzed cyclopropanation of vinyl benzoate with EDA. Reaction Conditions: 20  $\mu$ M enzyme, 2.5 mM substrate, 10 mM EDA, 10 mM dithionite, 10% MeOH, KPi buffer (50 mM, pH 7), Anaerobic. Assay yield, were determined by chiral GC-FID analysis using calibration curves with authentic (racemic) standards

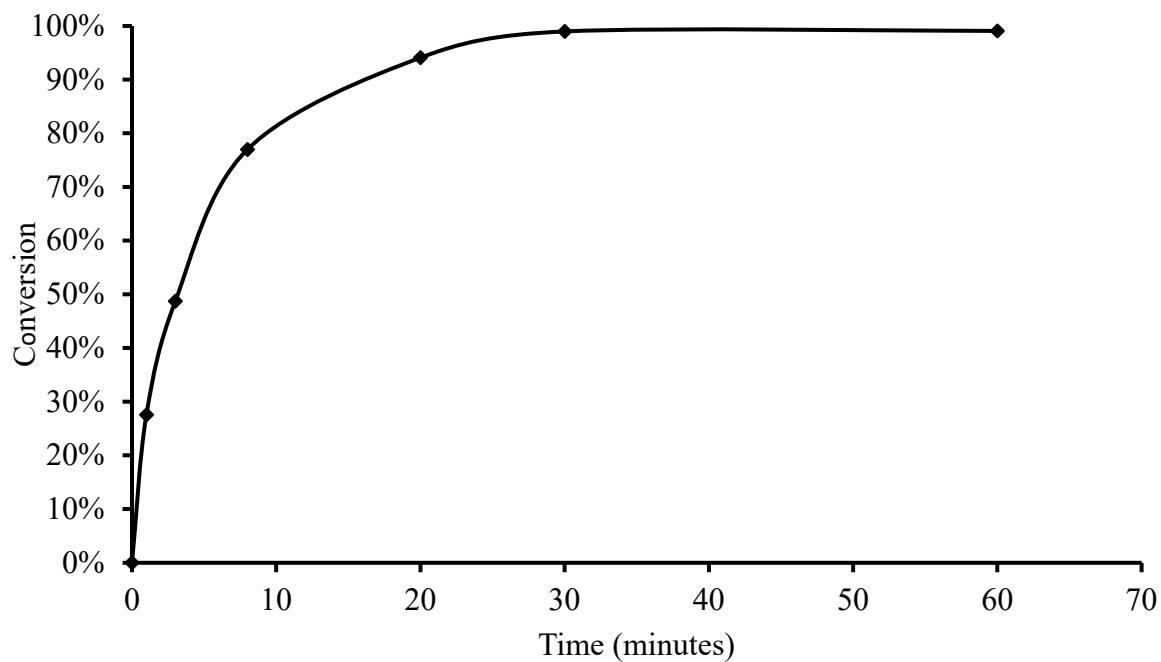

**Figure S3.** Inhibition Experiments with DMPO in the cyclopropanation reaction catalyzed by DHP(H55A,V59A). Reaction Conditions: 20  $\mu$ M enzyme, 2.5 mM vinyl benzoate 10 mM EDA, 10 mM  $\text{Na}_2\text{S}_2\text{O}_4$ , 5 mins, anaerobic, and room temperature. [a] with 100mM DMPO. All reactions were performed in triplicates.

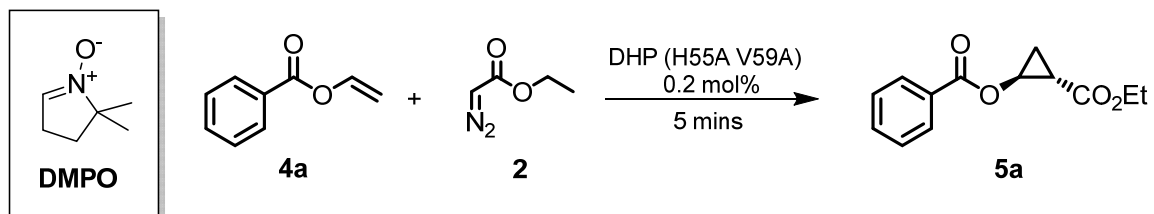

| Entry            | Variant         | DMPO | AY (%)          | de <sub>trans</sub> (%) | ee <sub>trans</sub> (%) |
|------------------|-----------------|------|-----------------|-------------------------|-------------------------|
| 1                | DHP (H55A V59A) | No   | 59( $\pm$ 0.02) | 99                      | 99                      |
| 2 <sup>[a]</sup> | DHP (H55A V59A) | Yes  | 63( $\pm$ 0.09) | 99                      | 99                      |



**Figure S4.** NOE experiment with ethyl 2-acetoxy-2-(4-fluorophenyl)cyclopropane-1-carboxylate (**5n**). a)  $^1\text{H}$  NMR spectrum of ethyl (1R,2S)-2-acetoxy-2-(4-fluorophenyl) cyclopropane-1-carboxylate; b) NOE spectrum of **5n** (major diastereomer) measured after irradiation of  $\text{H}_2$  proton. c) NOE spectrum of **5n** (major diastereomer) measured after irradiation of the  $\text{H}_1$  proton. NOE difference spectra yielded a NOE of 7-23% for the major diastereomer of **5n** and an NOE of 1-3% for the minor diastereomer of **5n**, consistent with *trans* relationship between the aryl group and the ethyl ester group across the cyclopropane ring.

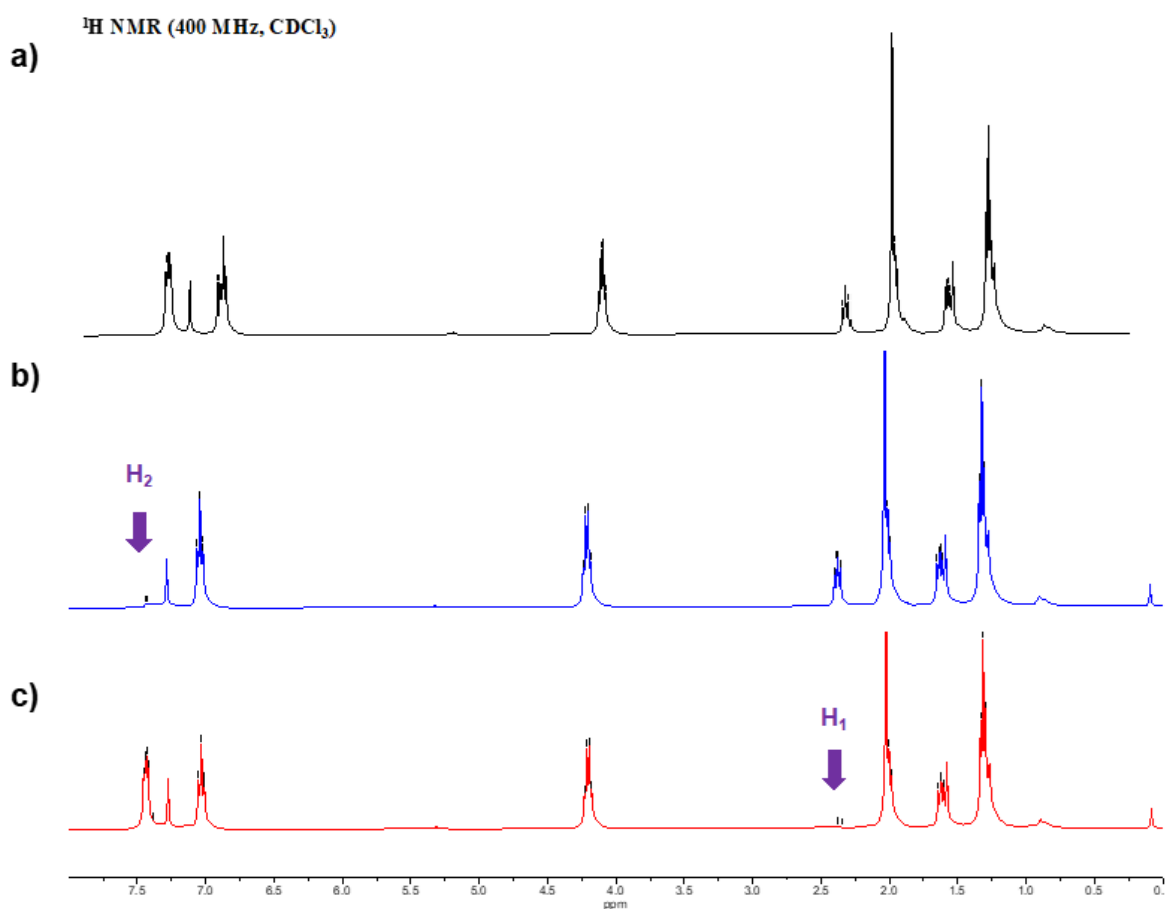

**Figure S5.**  $^2\text{H}$ -NMR spectra indicating d-3a-a product produced from DHP(H55AV59A)

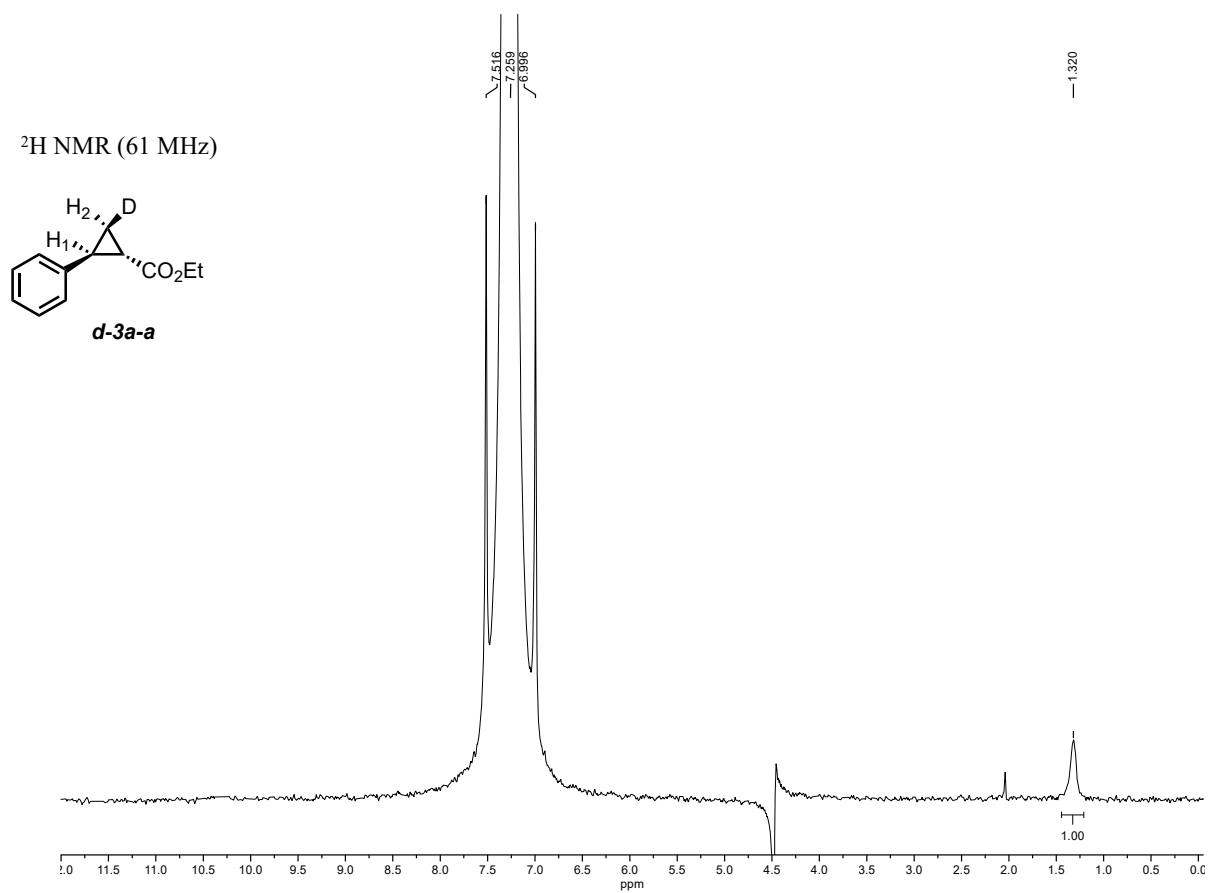

**Figure S6.** GC and SFC chromatograms for determination of diastereomeric and enantiomeric excess in the cyclopropanation reactions of vinyl benzoate and acetate substrates catalyzed by DHP(H55A,V59A). Reference racemic samples were prepared using  $\text{Rh}_2(\text{OAc})_4$  as catalyst described in the experimental procedures. GC method used for separation is described for each substrate, see **Product Analysis** section for details.

a) **ethyl (1S,2S)-2-phenylcyclopropane-1-carboxylate (3a)** GC analysis for diastereomeric and enantiomeric determination of compound **3a** using GC Separation Method 3. Racemic (*top*) and enzymatically (*bottom*) generated products are shown below

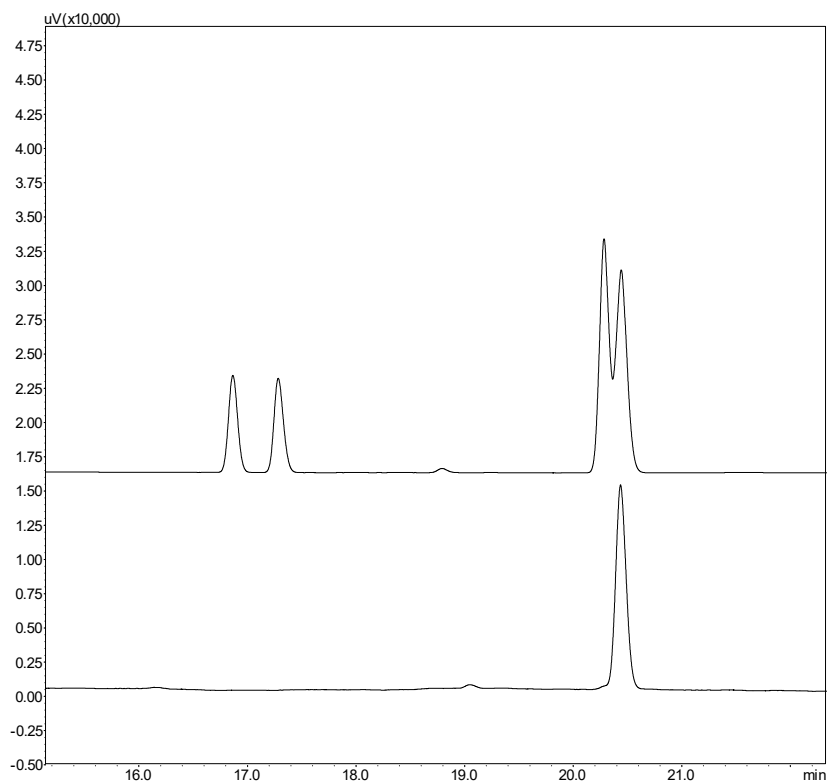

b) **(1S,2S)-2-(ethoxycarbonyl)cyclopropyl benzoate (5a)** SFC analysis of trans and cis isomers **5a** (left) and enzymatically produced **5a** product. Compound **5a** was analyzed using Daicel Chiralpak IF column and 2% of iPrOH

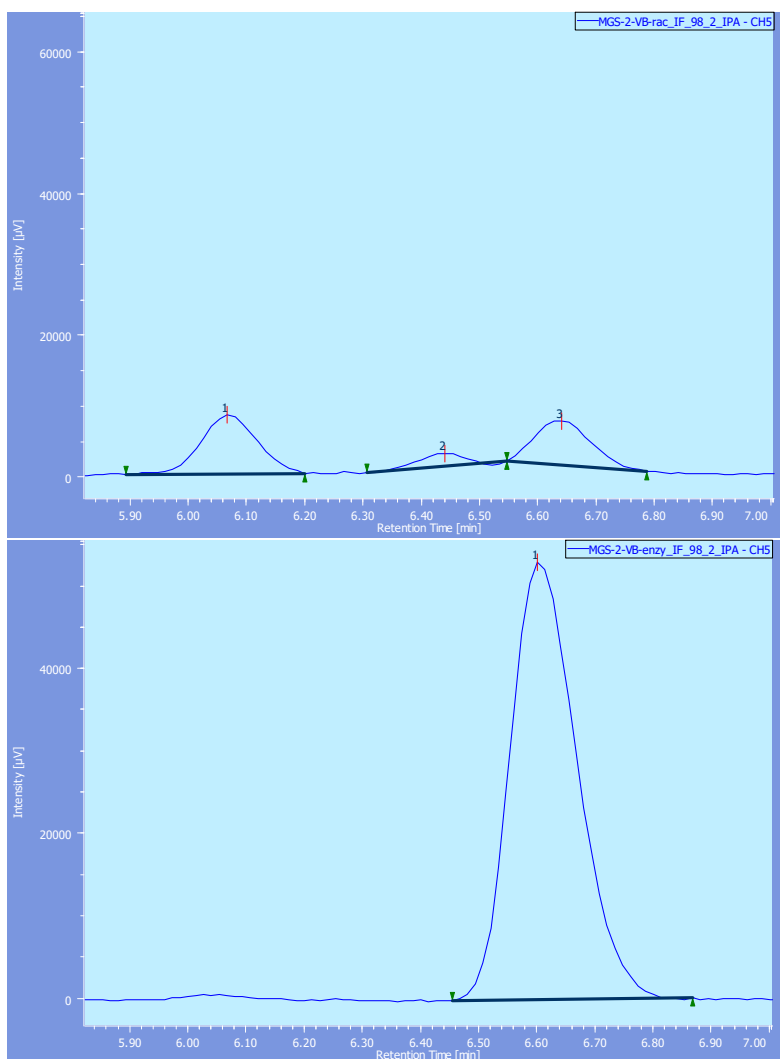

c) **(1*S*,2*R*)-1-butyl-2-(ethoxycarbonyl)cyclopropyl benzoate (5d)**. GC analysis for diastereomeric and enantiomeric determination of compound **5d** using GC Separation Method 1. Racemic (*top*) and enzymatically (*bottom*) generated products are shown below.

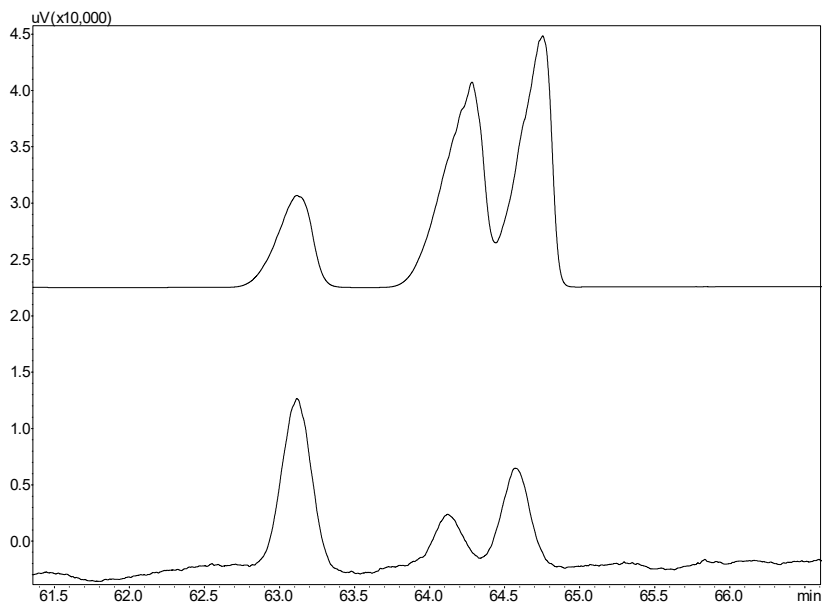

d) **(1*R*,2*R*)-2-(ethoxycarbonyl)-1-isopropylcyclopropyl benzoate (5e)**. GC analysis for diastereomeric and enantiomeric determination of compound **5e** using GC Separation Method 1. Racemic (*top*) and enzymatically (*bottom*) generated products are shown below.

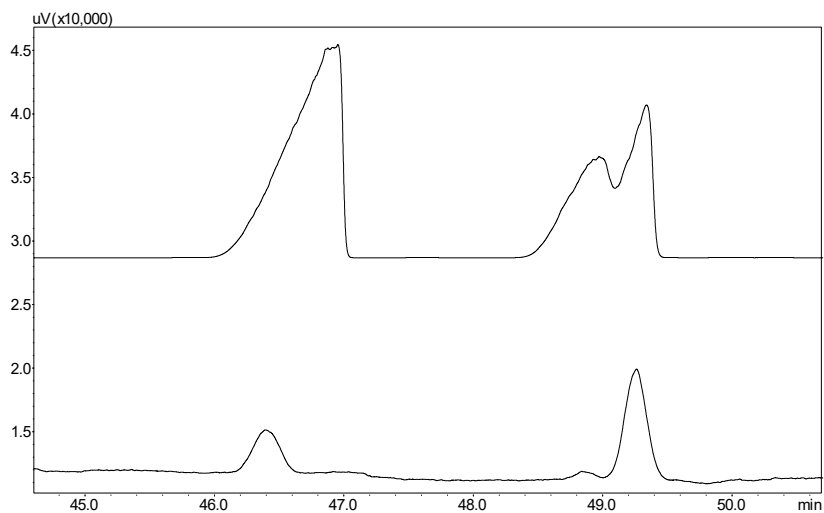

e) **(1*R*,2*R*)-2-(ethoxycarbonyl)-[1,1'-bi(cyclopropan)]-1-yl benzoate (5f)**. GC analysis for diastereomeric and enantiomeric determination of compound **5h** using GC Separation Method

1. Racemic (*top*) and enzymatically (*bottom*) generated products are shown below.

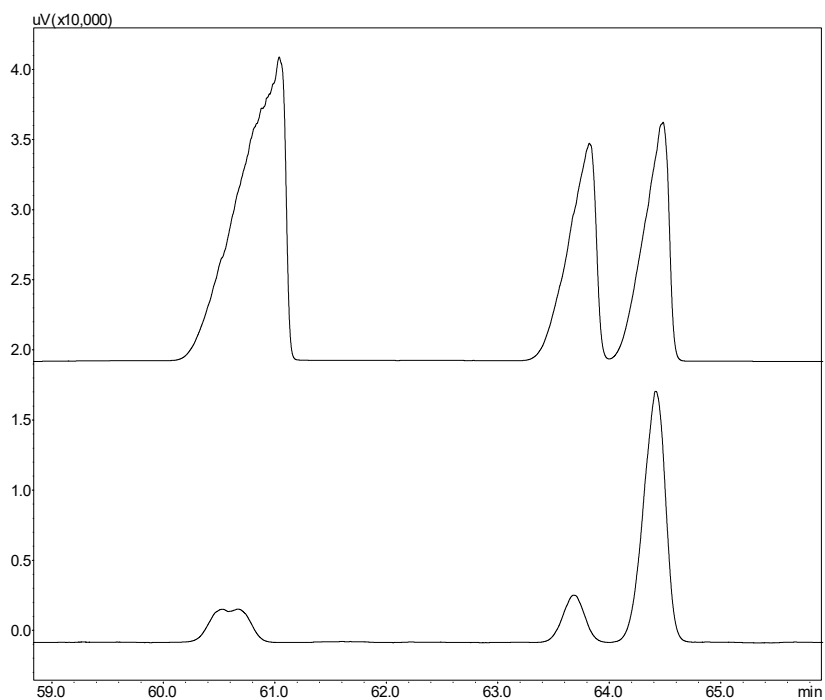

f) **(1R,2R)-1-cyclopentyl-2-(ethoxycarbonyl)cyclopropyl benzoate (5g)** GC analysis for diastereomeric and enantiomeric determination of compound **5g** using GC Separation Method

1. Racemic (*top*) and enzymatically (*bottom*) generated products are shown below.

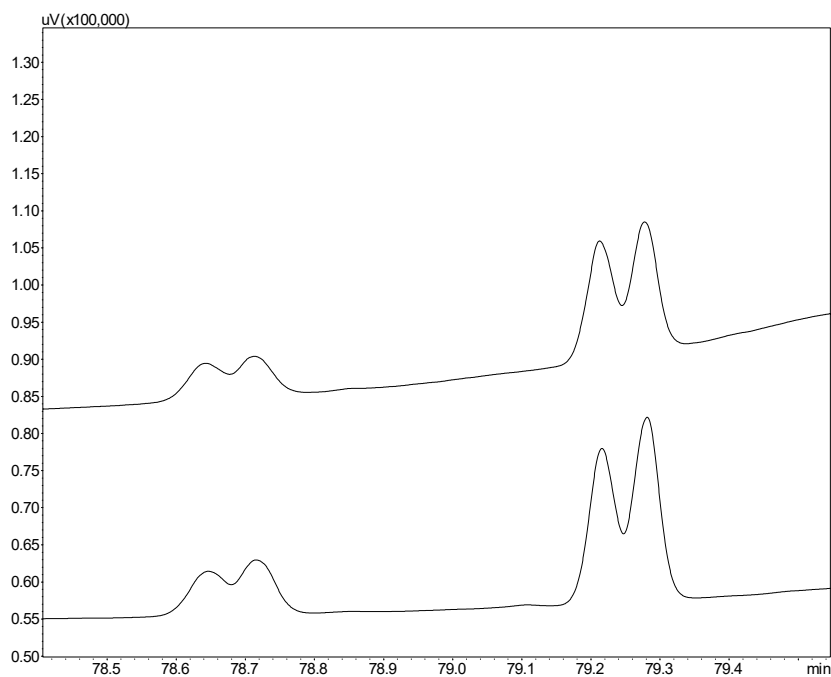

g) **(1S,2R)-2-(ethoxycarbonyl)-1-phenylcyclopropyl benzoate (5i)**. SFC analysis for diastereomeric and enantiomeric determination of compound **5i**. Racemic (*top*) and enzymatically (*bottom*) generated products are shown below. Compound **5i** was analyzed using Daicel Chiralpak IF column and 10% of iPrOH

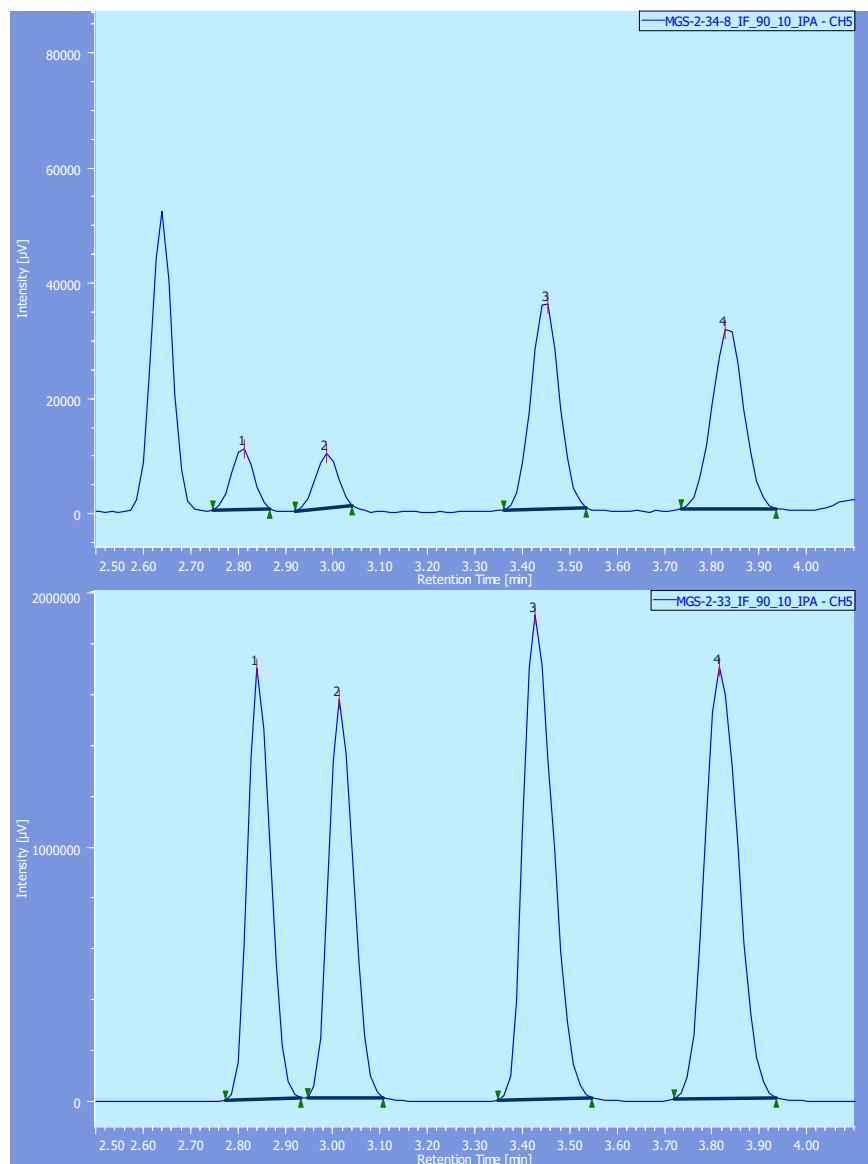



h) Ethyl (1R,2S)-2-acetoxy-2-phenylcyclopropane-1-carboxylate (**5j**) GC analysis for diastereomeric and enantiomeric determination of compound **5j** using GC Separation Method

2. Racemic (*top*) and enzymatically (*bottom*) generated products are shown below.

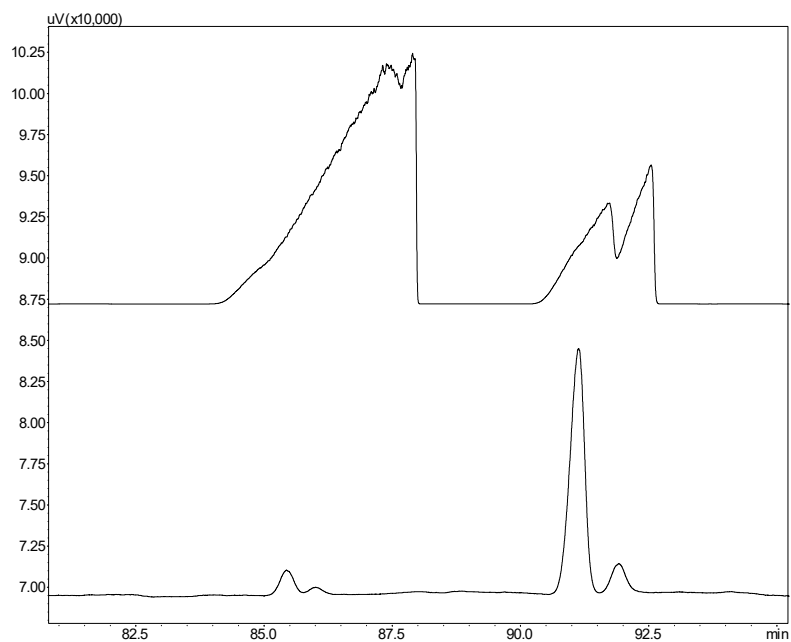

i) **Ethyl (1R,2S)-2-acetoxy-2-(o-tolyl)cyclopropane-1-carboxylate (5k)**. SFC analysis for diastereomeric and enantiomeric determination of compound **5k**. Racemic (*top*) and enzymatically (*bottom*) generated products are shown below. Compound **5k** was analyzed using Daicel Chiralpak IF column and 2% of iPrOH

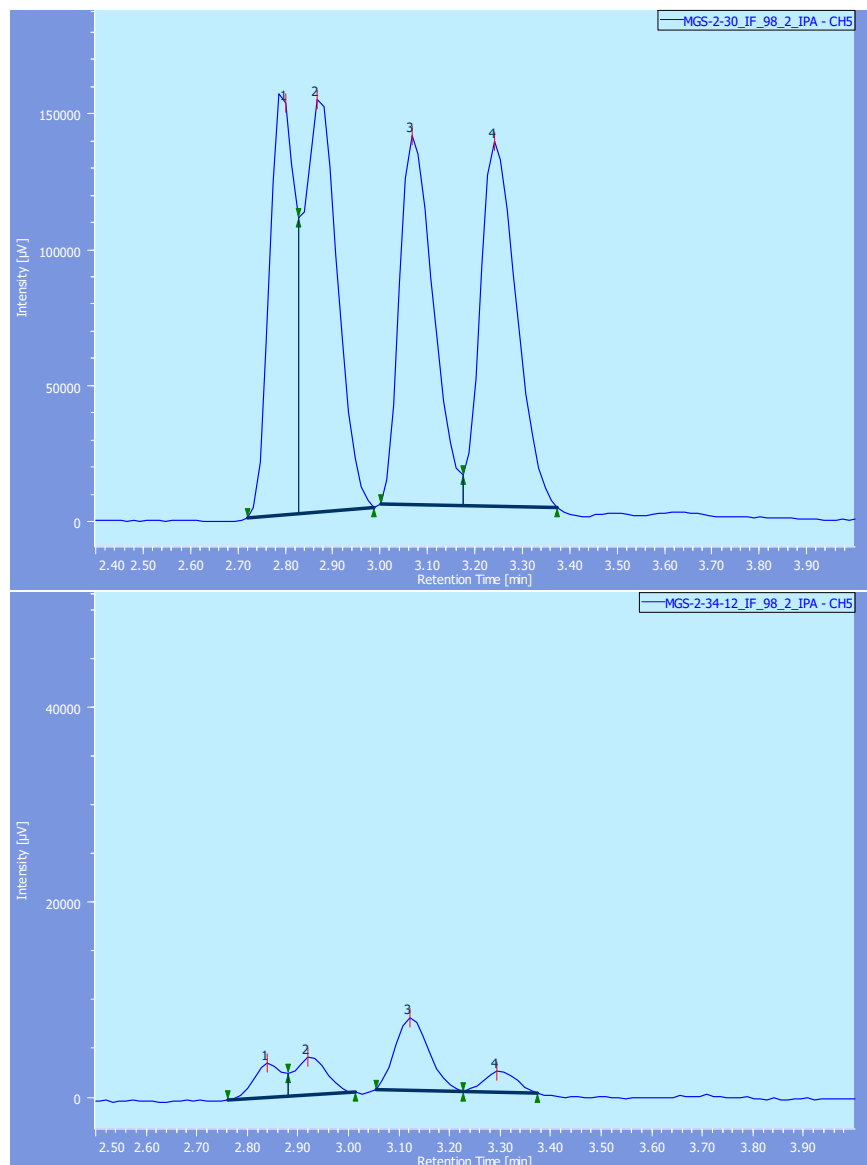

j) Ethyl (1*R*,2*S*)-2-acetoxy-2-(*p*-tolyl)cyclopropane-1-carboxylate (**5m**) GC analysis for diastereomeric and enantiomeric determination of compound **5m** using GC Separation Method

2. Racemic (*top*) and enzymatically (*bottom*) generated products are shown below.

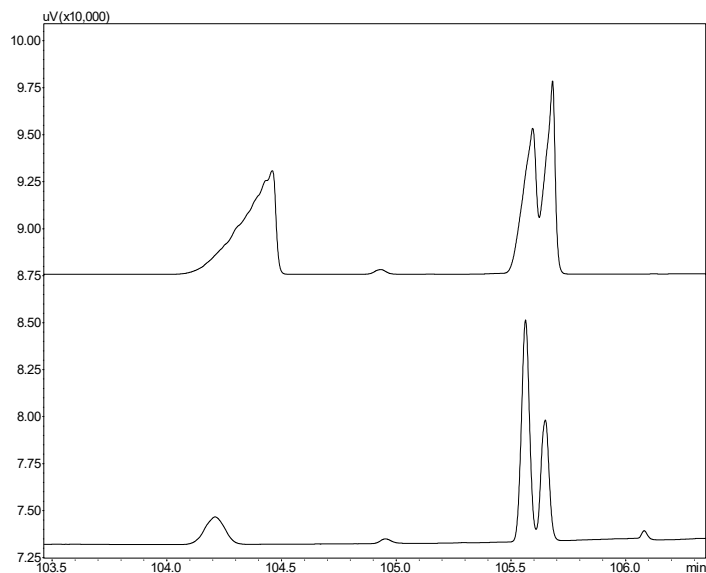

k) Ethyl (1*R*,2*S*)-2-acetoxy-2-(4-fluorophenyl)cyclopropane-1-carboxylate (**5n**). GC analysis for diastereomeric and enantiomeric determination of compound **5n** using GC Separation Method 1. Racemic (*top*) and enzymatically (*bottom*) generated products are shown below.

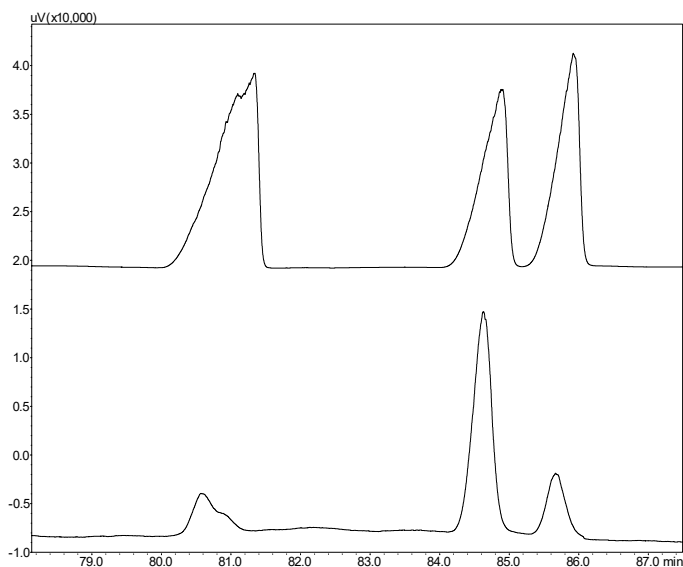

1) **Ethyl (1R,2S)-2-acetoxy-2-(4-bromophenyl) cyclopropane-1-carboxylate (5o)**. SFC analysis for diastereomeric and enantiomeric determination of compound **5o**. Racemic (*top*) and enzymatically (*bottom*) generated products are shown below. Compound **5o** was analyzed using Daicel Chiralpak IA column and 5% of iPrOH

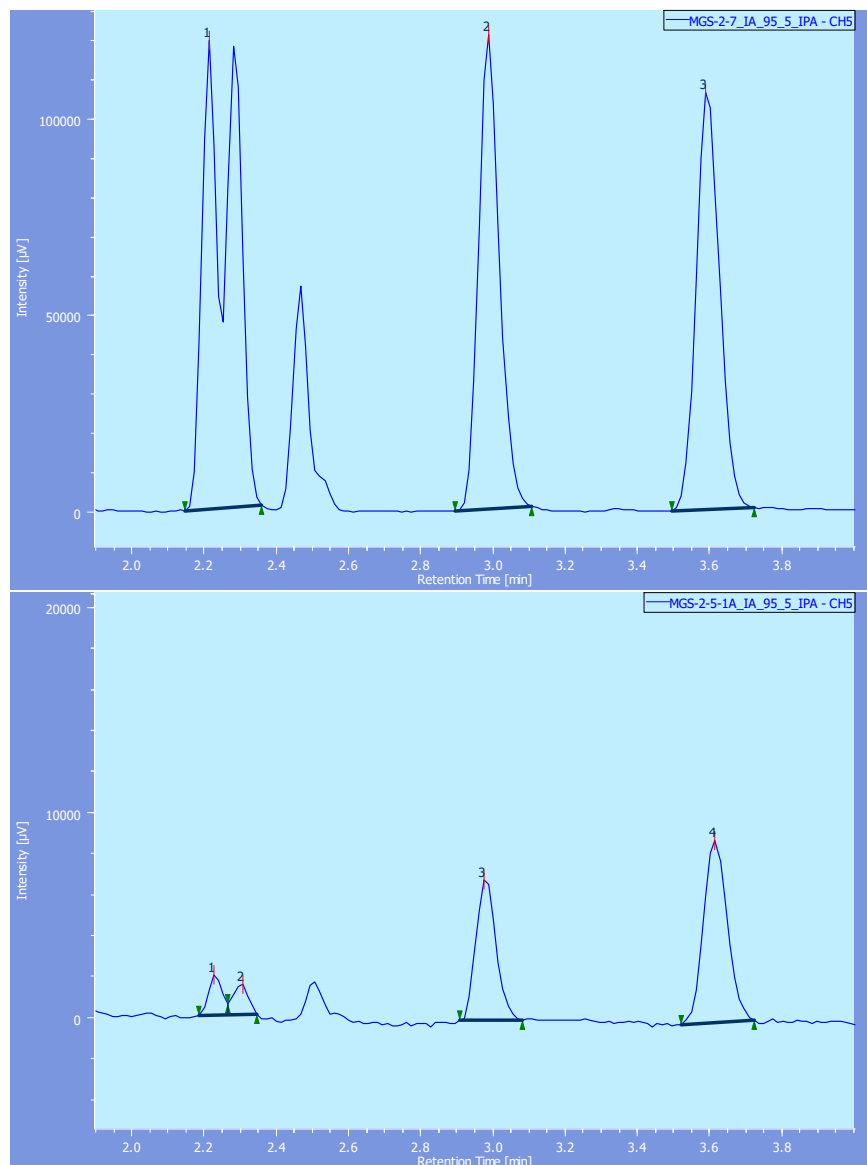

m) Ethyl (1*R*,2*S*)-2-acetoxy-2-(4-(trifluoromethyl)phenyl)cyclopropane-1-carboxylate (**5p**).

GC analysis for diastereomeric and enantiomeric determination of compound **5p** using GC Separation Method 2. Racemic (*top*) and enzymatically (*bottom*) generated products are shown below.

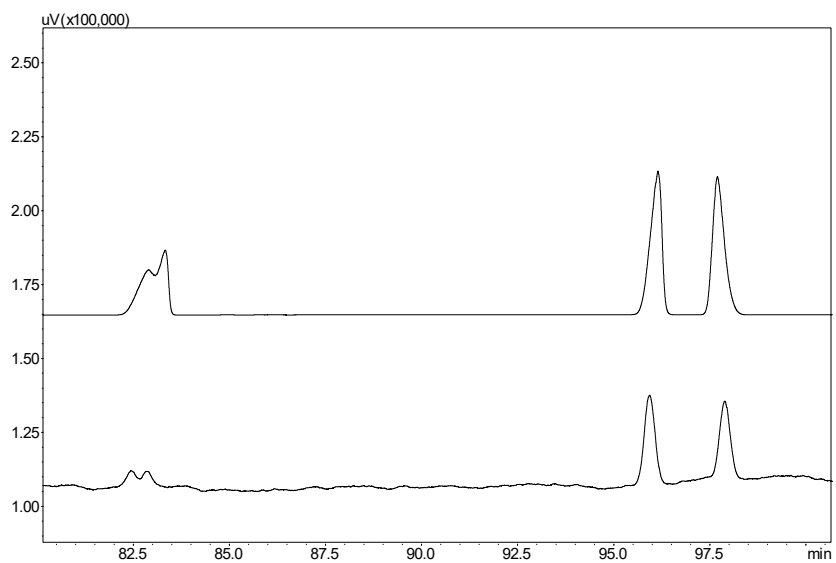

n) **Ethyl (1R,2S)-2-acetoxy-2-(4-methoxyphenyl) cyclopropane-1-carboxylate (5q)**. SFC analysis for diastereomeric and enantiomeric determination of compound **5q**. Racemic (*top*) and enzymatically (*bottom*) generated products are shown below. Compound **5q** was analyzed using Daicel Chiralpak IA column and 5% of iPrOH

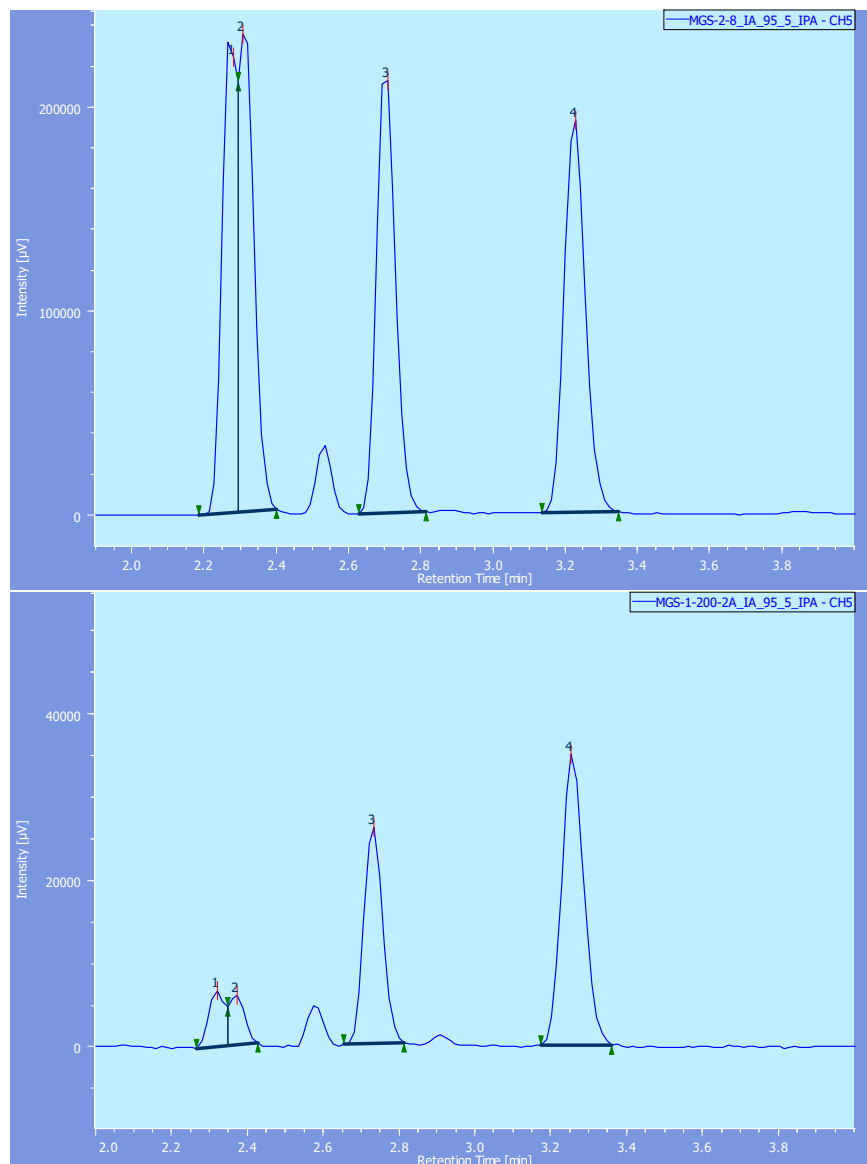

- o) **(1*S*,2*R*)-2-cyanocyclopropyl benzoate (7a)**. GC analysis for diastereomeric and enantiomeric determination of compound **5p** using GC Separation Method 1. WT DHP (*top*) and (DHP H55A, V59A) (*bottom*) generated products are shown below.

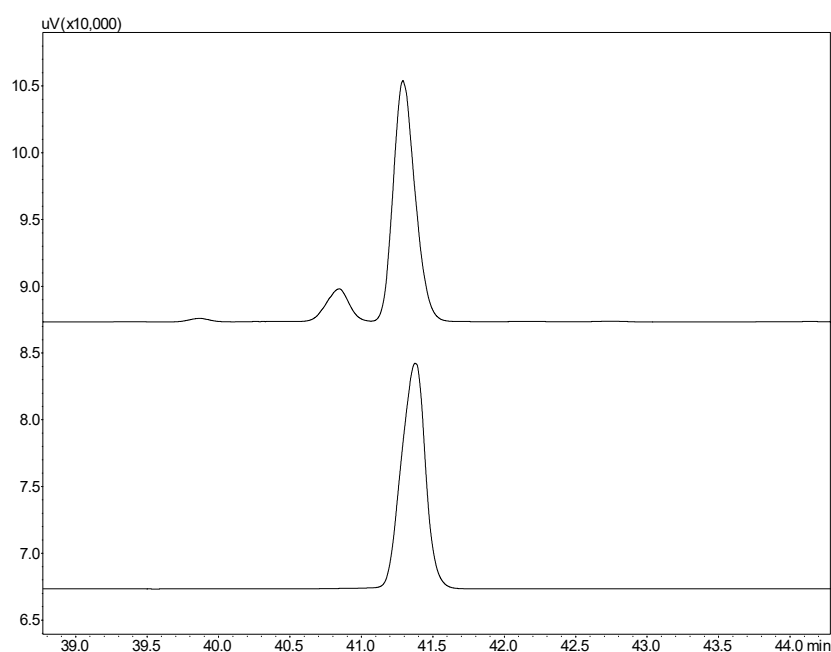

- p) **Ethyl phenylalaninate (8b)**. GC analysis for diastereomeric and enantiomeric determination of compound **8b**. GC Separation Method 3. Racemic (*top*) and enzymatically (*bottom*) generated products are shown below.

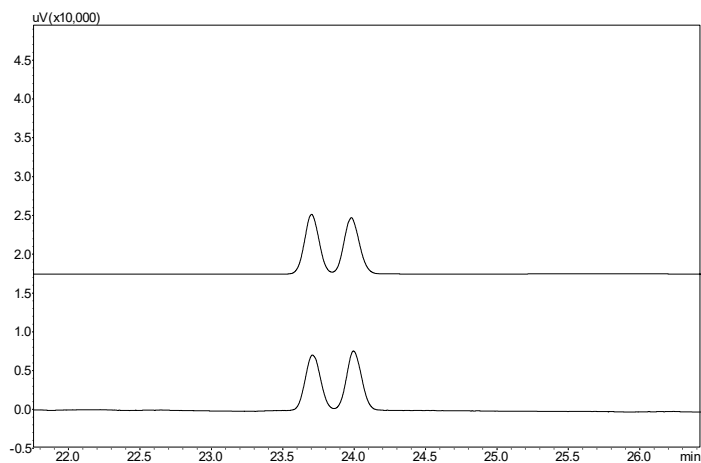

q) Ethyl (*S*)-2-(phenylthio)pent-4-enoate (**10a**). GC analysis for diastereomeric and enantiomeric determination of compound **5p** GC Separation Method 3. Racemic (*top*) and enzymatically (*bottom*) generated products are shown below.

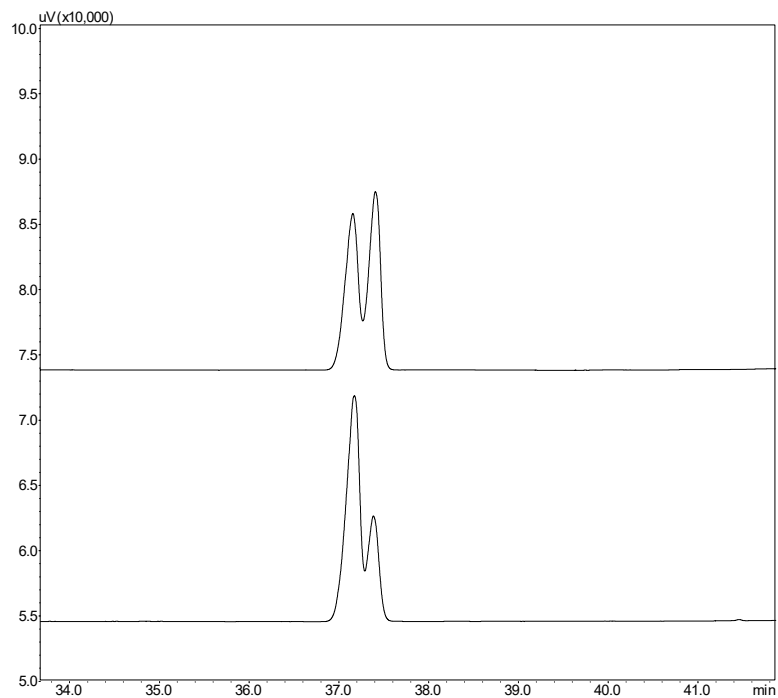



**Scheme 1.** Mechanistic proposal for the radical stepwise vs concerted carbene transfer pathway in DHP-catalyzed cyclopropanation of  $\beta$ -cis-deutero-styrene with EDA.

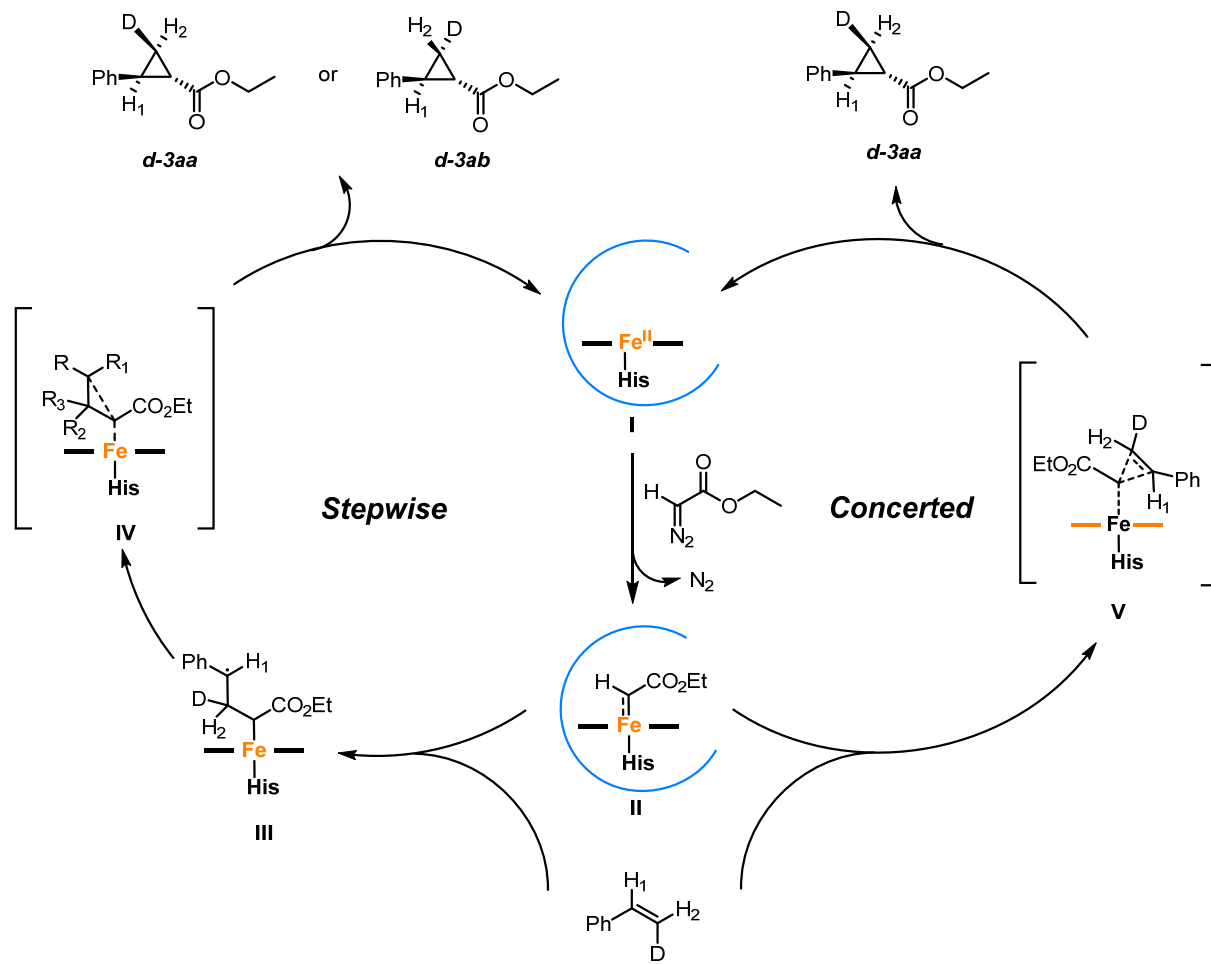

## Compound Characterization

### Vinyl 4-methylbenzoate (**4b**)

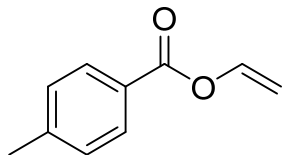

Following the general procedure A, **4b** was isolated as a colorless oil. (211 mg, 62% yield).

$^1\text{H NMR}$  (500 MHz,  $\text{CDCl}_3$ )  $\delta$  7.99 (d,  $J = 8.3$  Hz, 2H), 7.51 (dd,  $J = 13.9, 6.2$  Hz, 1H), 7.26 (d,  $J = 7.6$  Hz, 2H), 5.05 (dd,  $J = 13.9, 1.6$  Hz, 1H), 4.68 (dd,  $J = 6.3, 1.6$  Hz, 1H), 2.42 (s, 3H) ppm.

### Vinyl 4-methoxybenzoate (**4c**)

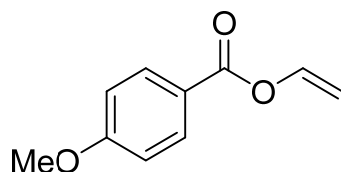

Following the general procedure A, **4c** was isolated as a white solid. (271 mg, 73% yield).

$^1\text{H NMR}$  (500 MHz,  $\text{CDCl}_3$ )  $\delta$  8.06 (d,  $J = 9.1$  Hz, 2H), 7.50 (ddd,  $J = 14.0, 6.3, 1.2$  Hz, 1H), 6.95 (d,  $J = 9.0$  Hz, 2H), 5.03 (dd,  $J = 14.0, 1.6$  Hz, 1H), 4.67 (dd,  $J = 6.3, 1.6$  Hz, 1H), 3.88 (s, 3H) ppm.

### Hex-1-en-2-yl benzoate (**4d**)

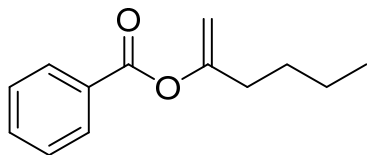

Following the general procedure B, **4d** was isolated as a colorless oil. (582 mg, 67% yield).

$^1\text{H NMR}$  (500 MHz,  $\text{CDCl}_3$ )  $\delta$  8.12 – 8.06 (m, 2H), 7.62 – 7.56 (m, 1H), 7.47 (t,  $J = 7.9$  Hz, 2H), 4.87 – 4.81 (m, 2H), 2.34 (t,  $J = 7.6$  Hz, 2H), 1.58 – 1.46 (m, 2H), 1.44 – 1.34 (m, 2H), 0.92 (t,  $J = 7.4$  Hz, 3H).

### 3-Methylbut-1-en-2-yl Benzoate (**4e**)

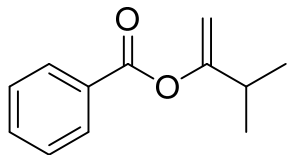

Following the general procedure B, **4e** was isolated as a colorless oil. (406 mg, 43% yield).

**<sup>1</sup>H NMR** (500 MHz, CDCl<sub>3</sub>) δ 8.10 (dd, *J* = 8.2, 1.5 Hz, 2H), 7.62 – 7.56 (m, 1H), 7.47 (t, *J* = 7.8 Hz, 2H), 4.88 (dd, *J* = 1.9, 1.0 Hz, 1H), 4.84 (d, *J* = 1.8 Hz, 1H), 2.64 – 2.51 (m, 1H), 1.16 (d, *J* = 6.9 Hz, 6H). **<sup>13</sup>C{<sup>1</sup>H}** NMR (126 MHz, CDCl<sub>3</sub>) δ 165.6, 162.2, 133.9, 130.7, 130.7, 129.2, 100.2, 33.2, 20.9 ppm. **HRMS** (ESI) *m/z* calculated for C<sub>12</sub>H<sub>15</sub>O<sub>2</sub><sup>+</sup> [M+H]<sup>+</sup> 191.1072, found 191.1064.

### 1-Cyclopropylvinyl Benzoate (**4f**)

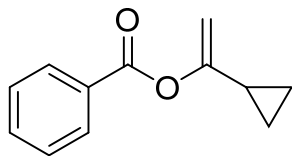

Following the general procedure B, **4f** was isolated as a colorless oil. (518 mg, 55% yield).

**<sup>1</sup>H NMR** (500 MHz, CDCl<sub>3</sub>) δ 8.11 – 8.04 (m, 2H), 7.63 – 7.56 (m, 1H), 7.51 – 7.42 (m, 2H), 4.90 (dd, *J* = 1.8, 0.7 Hz, 1H), 4.82 (d, *J* = 1.7 Hz, 1H), 1.71 – 1.61 (m, 1H), 0.78 – 0.69 (m, 2H), 0.72 – 0.65 (m, 2H). **<sup>13</sup>C{<sup>1</sup>H}** NMR (126 MHz, CDCl<sub>3</sub>) δ 165.5, 157.5, 134.1, 130.7, 130.5, 129.2, 100.7, 14.7, 6.4 ppm.

### 1-Cyclopentylvinyl Benzoate (**4g**)

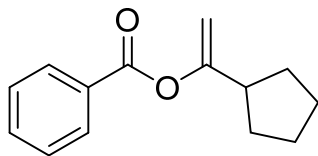

Following the general procedure B, **4g** was isolated as a colorless oil. (16 mg, 3% yield).

**<sup>1</sup>H NMR** (500 MHz, CDCl<sub>3</sub>) δ 8.13 – 8.04 (m, 2H), 7.62 – 7.55 (m, 1H), 7.47 (t, *J* = 7.8 Hz, 2H), 4.90 (d, *J* = 1.4 Hz, 1H), 4.84 (d, *J* = 1.7 Hz, 1H), 2.82 – 2.72 (m, 1H), 1.95 – 1.83 (m, 2H), 1.70 (dtd, *J* = 11.8, 8.7, 6.0, 3.5 Hz, 2H), 1.63 – 1.52 (m, 4H). **<sup>13</sup>C{<sup>1</sup>H}** NMR (126 MHz, CDCl<sub>3</sub>) δ 165.6, 159.9, 133.9, 130.8, 130.7, 129.2, 100.7, 44.6, 31.3, 25.7 ppm. **HRMS** (ESI) *m/z* calculated for C<sub>14</sub>H<sub>17</sub>O<sub>2</sub><sup>+</sup> [M+H]<sup>+</sup> 217.1228, found 217.1220.

### 1-Cyclohexylvinyl Benzoate (4h)

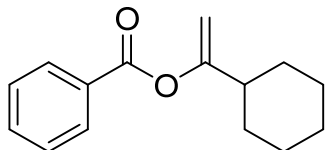

Following the general procedure B, **4h** was isolated as a colorless oil. (254 mg, 25% yield).

$^1\text{H NMR}$  (500 MHz,  $\text{CDCl}_3$ )  $\delta$  8.13 – 8.06 (m, 2H), 7.63 – 7.55 (m, 1H), 7.47 (dd,  $J = 8.7, 6.9$  Hz, 2H), 4.84 (d,  $J = 1.4$  Hz, 1H), 4.82 (d,  $J = 1.8$  Hz, 1H), 2.24 (tt,  $J = 10.6, 3.4$  Hz, 1H), 2.03 – 1.92 (m, 2H), 1.82 – 1.71 (m, 2H), 1.71 – 1.63 (m, 1H), 1.26 (ddt,  $J = 9.7, 7.8, 4.9$  Hz, 4H).

$^{13}\text{C}\{^1\text{H}\}$  NMR (126 MHz,  $\text{CDCl}_3$ )  $\delta$  165.6, 161.5, 133.9, 130.7, 130.7, 129.2, 100.4, 42.6, 31.4, 26.8, 26.7 ppm.

### 1-Phenylvinyl Benzoate (4i)

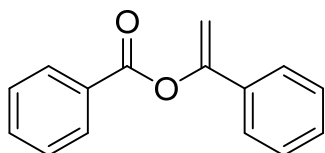

Following the general procedure B, **4i** was isolated as a colorless oil.

$^1\text{H NMR}$  (500 MHz,  $\text{CDCl}_3$ )  $\delta$  8.24 – 8.17 (m, 2H), 7.64 (ddt,  $J = 8.8, 7.0, 1.3$  Hz, 1H), 7.57 – 7.48 (m, 4H), 7.39 – 7.30 (m, 3H), 5.60 (d,  $J = 2.2$  Hz, 1H), 5.17 (d,  $J = 2.3$  Hz, 1H).  $^{13}\text{C}\{^1\text{H}\}$  NMR (126 MHz,  $\text{CDCl}_3$ )  $\delta$  165.6, 153.9, 135.0, 134.3, 130.9, 130.2, 129.7, 129.4, 129.3, 125.7, 103.1, 77.7, 30.5 ppm.

### 1-phenylvinyl acetate (4j)

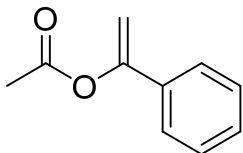

Following the general procedure C, **4j** was isolated as a light yellow oil. (79 mg, 6% yield).

$^1\text{H NMR}$  (500 MHz,  $\text{CDCl}_3$ )  $\delta$  7.49 – 7.44 (m, 2H), 7.38 – 7.30 (m, 3H), 5.48 (d,  $J = 2.2$  Hz, 1H), 5.03 (d,  $J = 2.2$  Hz, 1H), 2.28 (s, 3H).

### 1-(*o*-tolyl)vinyl acetate (4k)

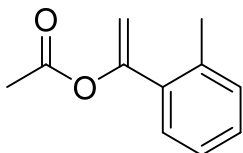

Following the general procedure C, **4k** was isolated as a light yellow oil.

$^1\text{H NMR}$  (400 MHz,  $\text{CDCl}_3$ )  $\delta$  7.37 (d,  $J = 7.2$  Hz, 1H), 7.28 – 7.19 (m, 2H), 7.18 (d,  $J = 6.9$  Hz, 2H), 5.18 (d,  $J = 1.6$  Hz, 1H), 5.02 (d,  $J = 1.5$  Hz, 1H), 2.41 (s, 3H), 2.14 (s, 3H).

#### 1-(*m*-tolyl)vinyl acetate (**4l**)

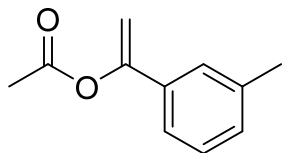

Following the general procedure C, **4l** was isolated as a light yellow oil.

$^1\text{H NMR}$  (500 MHz,  $\text{CDCl}_3$ )  $\delta$  7.31 – 7.18 (m, 3H), 7.14 (d,  $J = 7.1$  Hz, 1H), 5.45 (s, 1H), 5.00 (s, 1H), 2.35 (s, 3H), 2.28 (s, 3H).

#### 1-(*p*-tolyl)vinyl acetate (**4m**)

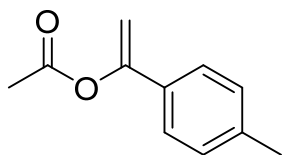

Following the general procedure C, **4m** was isolated as a light yellow oil.

$^1\text{H NMR}$  (500 MHz,  $\text{CDCl}_3$ )  $\delta$  7.35 (d,  $J = 6.3$  Hz, 1H), 7.15 (d,  $J = 7.3$  Hz, 2H), 5.42 (d,  $J = 1.9$  Hz, 1H), 4.96 (d,  $J = 2.0$  Hz, 1H), 2.34 (s, 2=3H), 2.27 (s, 3H).

#### 1-(4-fluorophenyl)vinyl acetate (**4n**)

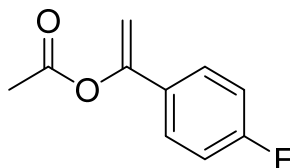

Following the general procedure C, **4n** was isolated as a light yellow oil. (216 mg, 33% yield).

$^1\text{H NMR}$  (500 MHz,  $\text{CDCl}_3$ )  $\delta$  7.47 – 7.40 (m, 2H), 7.03 (t,  $J = 8.7$  Hz, 2H), 5.40 (d,  $J = 2.3$  Hz, 1H), 5.01 (d,  $J = 2.3$  Hz, 1H), 2.27 (s, 3H).

#### 1-(4-bromophenyl)vinyl acetate (**4o**)

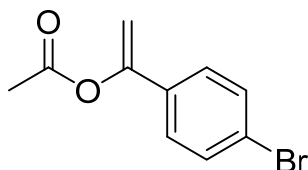

Following the general procedure C, **4o** was isolated as a light yellow oil. (177 mg, 25% yield).

$^1\text{H NMR}$  (500 MHz,  $\text{CDCl}_3$ )  $\delta$  7.47 (dd,  $J = 8.8, 1.9$  Hz, 2H), 7.36 – 7.29 (m, 2H), 5.46 (d,  $J = 2.4$  Hz, 1H), 5.05 (d,  $J = 2.2$  Hz, 1H), 2.27 (s, 3H).

**1-(4-(trifluoromethyl)phenyl)vinyl acetate (4p)**

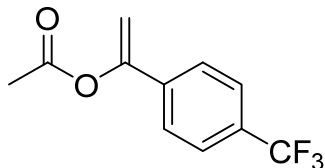

Following the general procedure C, **4p** was isolated as a light yellow oil.

$^1\text{H NMR}$  (500 MHz,  $\text{CDCl}_3$ )  $\delta$  7.63 – 7.59 (m, 2H), 7.59 – 7.55 (m, 2H), 5.57 (d,  $J = 2.4$  Hz, 1H), 5.16 (d,  $J = 2.5$  Hz, 1H), 2.29 (s, 3H).

**1-(4-methoxyphenyl)vinyl acetate (4q)**

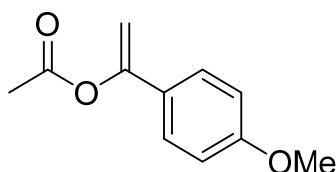

Following the general procedure C, **4q** was isolated as a white solid. (197 mg, 31% yield).

$^1\text{H NMR}$  (500 MHz,  $\text{CDCl}_3$ )  $\delta$  7.40 – 7.35 (m, 2H), 6.85 – 6.80 (m, 2H), 5.33 (d,  $J = 2.2$  Hz, 1H), 4.89 (d,  $J = 2.2$  Hz, 1H), 3.73 (s, 3H), 2.22 (s, 3H).

**(1S,2S)-2-(ethoxycarbonyl)cyclopropyl benzoate (5a)**

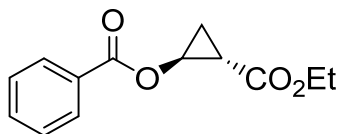

Following the general procedure D, *trans* isomer of **5a** was isolated as colorless oil. (11 mg, 47% yield)

$^1\text{H NMR}$  (500 MHz,  $\text{CDCl}_3$ )  $\delta$  7.99 (dd,  $J = 9.6, 1.3$  Hz, 2H), 7.60 – 7.55 (m, 1H), 7.44 (dd,  $J = 15.7, 1.6$  Hz, 2H), 4.66 (ddd,  $J = 6.8, 4.2, 2.3$  Hz, 1H), 4.18 (q,  $J = 7.1$  Hz, 2H), 2.02 (ddd,  $J = 9.9, 6.3, 2.3$  Hz, 1H), 1.54 (q,  $J = 6.4$  Hz, 1H), 1.43 (dq,  $J = 6.1, 4.3$  Hz, 2H), 1.29 (t,  $J = 7.1$  Hz, 3H).

**(1S,2S)-2-(ethoxycarbonyl)cyclopropyl 4-methylbenzoate (5b)**

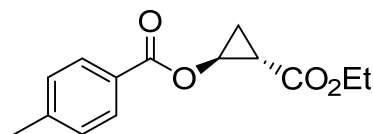

Following the general procedure D, *trans* isomer of **5b** was isolated as colorless oil. (10 mg, 13% yield).

**<sup>1</sup>H NMR (500 MHz, CDCl<sub>3</sub>)** δ 7.89 (dd, *J* = 8.3, 1.8 Hz, 2H), 7.22 (d, *J* = 8.1 Hz, 2H), 4.50 (td, *J* = 6.9, 4.7 Hz, 1H), 4.15 – 4.08 (m, 2H), 2.40 (s, 3H), 2.05 (dt, *J* = 8.9, 7.1 Hz, 1H), 1.73 (td, *J* = 6.8, 4.6 Hz, 1H), 1.35 (dt, *J* = 8.9, 6.6 Hz, 1H), 1.19 (t, *J* = 7.1 Hz, 3H). **<sup>13</sup>C{<sup>1</sup>H} NMR (126 MHz, CDCl<sub>3</sub>)** δ 144.7, 130.5, 129.8, 61.5, 53.5, 30.4, 22.4, 20.8, 14.9, 12.9 ppm. **HRMS (ESI)** *m/z* calculated for C<sub>14</sub>H<sub>17</sub>O<sub>4</sub><sup>+</sup> [M+H]<sup>+</sup> 249.1127, found 249.1117.

**(1*S*,2*S*)-2-(ethoxycarbonyl)cyclopropyl 4-methoxybenzoate (5c)**

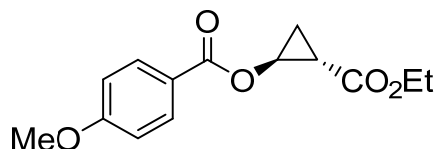

Following the general procedure D, *trans* isomer of **5c** was isolated as colorless oil (5 mg, 7% yield).

**<sup>1</sup>H NMR (500 MHz, CDCl<sub>3</sub>)** δ 7.95 – 7.92 (m, 2H), 6.92 – 6.90 (m, 2H), 4.63 – 4.60 (ddd, *J* = 6.7, 4.2, 2.3 Hz, 1H), 4.18 – 4.15 (q, *J* = 7.2 Hz, 2H), 3.86 (d, *J* = 1.6 Hz, 3H), 1.99 (ddd, *J* = 9.8, 6.3, 2.3 Hz, 1H), 1.54 – 1.49 (m, 1H), 1.41 (ddd, *J* = 10.1, 6.2, 4.3 Hz, 1H), 1.29 (t, *J* = 7.2 Hz, 3H). **<sup>13</sup>C{<sup>1</sup>H} NMR (126 MHz, CDCl<sub>3</sub>)** δ 172.4, 164.4, 132.4, 122.4, 114.4, 61.6, 56.2, 55.3, 30.4, 21.5, 15.1, 14.9 ppm. **HRMS (ESI)** *m/z* calculated for C<sub>14</sub>H<sub>17</sub>O<sub>5</sub><sup>+</sup> [M+H]<sup>+</sup> 265.1076, found 265.1066.

**(1*S*,2*R*)-1-butyl-2-(ethoxycarbonyl)cyclopropyl benzoate (5d)**

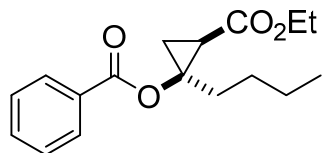

Following the general procedure D, *trans* isomer of **5d** was isolated as colorless oil. (18 mg, 13% yield). The isolated compound contains a minor amount (<5%) of a second diastereomer.

**<sup>1</sup>H NMR (500 MHz, CDCl<sub>3</sub>)** δ 8.02 – 7.93 (m, 2H), 7.58 – 7.50 (m, 1H), 7.46 – 7.37 (m, 2H), 4.19 (q, *J* = 7.1 Hz, 2H), 2.16 – 2.05 (m, 2H), 1.99 (ddd, *J* = 15.2, 10.5, 4.8 Hz, 1H), 1.51 – 1.42 (m, 3H), 1.39 – 1.25 (m, 5H), 0.84 (t, *J* = 7.2 Hz, 3H). **<sup>13</sup>C{<sup>1</sup>H} NMR (126 MHz, CDCl<sub>3</sub>)** δ 171.8, 166.3, 133.9, 130.8, 130.3, 129.1, 66.6, 61.6, 29.5, 28.9, 26.9, 23.1, 20.5, 15.0, 14.8 ppm. **HRMS (ESI)** *m/z* calculated for C<sub>17</sub>H<sub>23</sub>O<sub>4</sub><sup>+</sup> [M+H]<sup>+</sup> 291.1596, found 291.1584.

**(1*R*,2*R*)-2-(ethoxycarbonyl)-1-isopropylcyclopropyl benzoate (5e)**

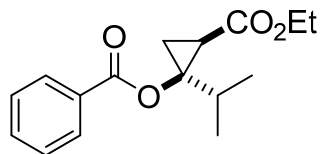

Following the general procedure D, *trans* isomer of **5e** was isolated as colorless oil. (5 mg, 14% yield).

**<sup>1</sup>H NMR (500 MHz, CDCl<sub>3</sub>)** δ 8.00 – 7.95 (m, 2H), 7.56 – 7.51 (m, 1H), 7.44 – 7.38 (m, 2H), 4.08 (qq, *J* = 10.8, 7.1 Hz, 2H), 2.21 (hept, *J* = 6.6 Hz, 1H), 2.03 (dd, *J* = 9.1, 7.1 Hz, 1H), 1.79 (t, *J* = 6.9 Hz, 1H), 1.39 (dd, *J* = 9.1, 6.7 Hz, 1H), 1.16 (t, *J* = 7.1 Hz, 3H), 1.01 (dd, *J* = 15.2, 6.8 Hz, 6H). **<sup>13</sup>C{<sup>1</sup>H} NMR (126 MHz, CDCl<sub>3</sub>)** δ 170.7, 166.8, 133.7, 131.0, 130.4, 129.0, 77.9, 69.2, 61.5, 33.3, 24.7, 19.5, 19.3, 17.6, 14.9. **HRMS (ESI)** *m/z* calculated for C<sub>16</sub>H<sub>21</sub>O<sub>4</sub><sup>+</sup> [M+H]<sup>+</sup> 277.1435, found 277.1429.

**(1R,2R)-2-(ethoxycarbonyl)-[1,1'-bi(cyclopropan)]-1-yl benzoate (5f)**

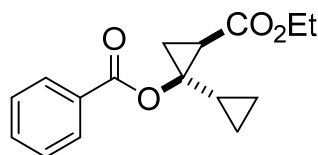

Following the general procedure D, *trans* isomer of **5f** was isolated as colorless oil. (8 mg, 20% yield). The isolated compound contains a minor amount (<5%) of a second diastereomer.

**<sup>1</sup>H NMR (400 MHz, CDCl<sub>3</sub>)** δ 8.00 (dt, *J* = 7.0, 1.4 Hz, 2H), 7.60 – 7.53 (m, 1H), 7.44 (t, *J* = 7.8 Hz, 2H), 4.23 (qd, *J* = 7.1, 1.5 Hz, 2H), 2.20 (dd, *J* = 9.8, 7.2 Hz, 1H), 1.65 (tt, *J* = 8.4, 6.0 Hz, 1H), 1.45 (t, *J* = 6.9 Hz, 1H), 1.38 (dd, *J* = 9.8, 6.5 Hz, 1H), 1.32 (t, *J* = 7.1 Hz, 3H), 0.67 (dddd, *J* = 10.0, 8.2, 5.5, 3.1 Hz, 1H), 0.62 – 0.49 (m, 3H). **<sup>13</sup>C{<sup>1</sup>H} NMR (126 MHz, CDCl<sub>3</sub>)** δ 170.4, 167.0, 133.7, 130.9, 130.4, 129.0, 66.6, 61.5, 26.5, 17.9, 16.8, 14.9, 4.4, 4.3 ppm. **HRMS (ESI)** *m/z* calculated for C<sub>16</sub>H<sub>19</sub>O<sub>4</sub><sup>+</sup> [M+H]<sup>+</sup> 275.1283, found 275.1274.

**(1R,2R)-1-cyclopentyl-2-(ethoxycarbonyl)cyclopropyl benzoate (5g)**

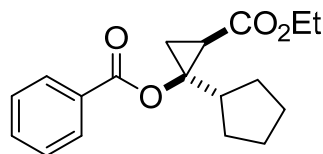

Following the general procedure using styrene, *trans* isomer of **5g** was isolated as colorless oil.

**<sup>1</sup>H NMR (500 MHz, CDCl<sub>3</sub>)** δ 7.98 – 7.94 (m, 2H), 7.56 – 7.50 (m, 1H), 7.41 (t, *J* = 7.6 Hz, 2H), 4.08 (qq, *J* = 10.8, 7.1 Hz, 2H), 2.74 – 2.63 (m, 1H), 2.05 (dd, *J* = 9.1, 7.1 Hz, 1H), 1.78 (dt, *J* = 13.6, 7.7 Hz, 3H), 1.63 (dh, *J* = 13.3, 3.4 Hz, 2H), 1.55 (qt, *J* = 7.6, 2.8 Hz, 2H), 1.38 (dd, *J* = 9.1, 6.6 Hz, 1H), 1.17 (t, *J* = 7.1 Hz, 4H). **<sup>13</sup>C{<sup>1</sup>H} NMR (126 MHz, CDCl<sub>3</sub>)** <sup>13</sup>C NMR (126



MHz, CDCl<sub>3</sub>)  $\delta$  170.7, 166.8, 133.6, 131.1, 130.3, 129.0, 67.6, 61.5, 43.9, 30.0, 29.6, 25.7, 25.1, 17.3, 14.9. **HRMS** (ESI)  $m/z$  calculated for C<sub>18</sub>H<sub>23</sub>O<sub>4</sub><sup>+</sup> [M+H]<sup>+</sup> 303.1596, found 303.1586.

### (1R,2R)-1-cyclohexyl-2-(ethoxycarbonyl)cyclopropyl benzoate (**5h**)

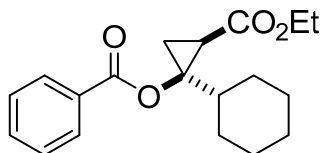

Following the general procedure D, *trans* isomer of **5h** was isolated as colorless oil. (5 mg, 4% yield).

**<sup>1</sup>H NMR** (500 MHz, CDCl<sub>3</sub>)  $\delta$  7.97 (d,  $J$  = 7.7 Hz, 2H), 7.54 (t,  $J$  = 7.5 Hz, 1H), 7.46 – 7.35 (m, 2H), 4.07 (tddd,  $J$  = 16.2, 12.1, 7.6, 4.2 Hz, 2H), 2.08 – 1.99 (m, 1H), 1.94 – 1.80 (m, 3H), 1.76 (dq,  $J$  = 10.6, 3.2 Hz, 3H), 1.65 (d,  $J$  = 13.1 Hz, 1H), 1.39 (ddd,  $J$  = 9.1, 6.6, 2.4 Hz, 1H), 1.28 – 1.19 (m, 2H), 1.16 (td,  $J$  = 7.2, 2.3 Hz, 3H), 1.12 – 0.95 (m, 2H). **<sup>13</sup>C{<sup>1</sup>H}** NMR (126 MHz, CDCl<sub>3</sub>)  $\delta$  170.7, 166.8, 133.6, 131.0, 130.4, 129.0, 68.8, 61.5, 54.2, 42.9, 29.9, 29.7, 26.8, 26.8, 26.7, 24.5, 17.6, 14.9 ppm. **HRMS** (ESI)  $m/z$  calculated for C<sub>19</sub>H<sub>25</sub>O<sub>4</sub><sup>+</sup> [M+H]<sup>+</sup> 317.1753, found 317.1743.

### 2-(ethoxycarbonyl)-1-phenylcyclopropyl benzoate (**5i**)

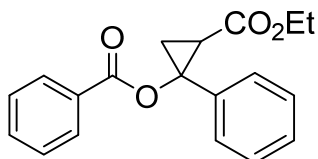

Following the general procedure D, **5i** was isolated as a mixture of *cis* and *trans* isomers, yellow oil (54 mg, 40% yield).

We were unable to separate the diastereomers, resulting in a mixture of *cis* and *trans* with ratios of 1.4:1 (*trans*:*cis*). **<sup>1</sup>H NMR** (500 MHz, CDCl<sub>3</sub>)  $\delta$  8.00 (ddd,  $J$  = 13.0, 8.4, 1.4 Hz, 3.59H), 7.63 – 7.58 (m, 1.53H), 7.55 (dddd,  $J$  = 10.9, 5.3, 2.7, 1.4 Hz, 1.65H), 7.46 – 7.37 (m, 5.57H), 7.36 – 7.31 (m, 2.83H), 7.31 – 7.27 (m, 1.38H), 4.17 (dddd,  $J$  = 18.0, 10.8, 7.2, 3.7 Hz, 2H), 3.96 – 3.90 (m, 1.48H), 2.57 (dd,  $J$  = 9.6, 7.4 Hz, 0.76H), 2.48 (dd,  $J$  = 9.2, 7.5 Hz, 1.01H), 2.32 (t,  $J$  = 7.2 Hz, 0.84H), 2.18 (dd,  $J$  = 7.6, 6.5 Hz, 1.03H), 1.83 (dd,  $J$  = 9.2, 6.6 Hz, 1.08H), 1.76 (dd,  $J$  = 9.6, 6.9 Hz, 0.81H), 1.23 (t,  $J$  = 7.1 Hz, 3.12H), 1.00 (t,  $J$  = 7.1 Hz, 2.41H). **HRMS** (ESI)  $m/z$  calculated for C<sub>19</sub>H<sub>19</sub>O<sub>4</sub><sup>+</sup> [M+H]<sup>+</sup> 311.1283, found 311.1271.

### Ethyl (1R,2S)-2-acetoxy-2-phenylcyclopropane-1-carboxylate (**5j**)

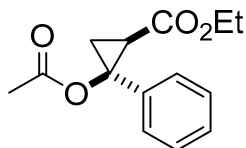

Following the general procedure D, *trans* isomer of **5j** was isolated as colorless oil. (36 mg, 24% yield). The isolated compound contains a minor amount (<5%) of a second diastereomer.

**<sup>1</sup>H NMR (500 MHz, CDCl<sub>3</sub>)** δ 7.40 – 7.35 (m, 2H), 7.33 (ddd, *J* = 7.7, 6.7, 1.3 Hz, 2H), 7.30 – 7.25 (m, 1H), 4.19 (qd, *J* = 7.2, 0.9 Hz, 2H), 2.40 (dd, *J* = 9.2, 7.4 Hz, 1H), 2.04 (s, 3H), 2.01 (dd, *J* = 7.5, 6.4 Hz, 1H), 1.66 (dd, *J* = 9.3, 6.5 Hz, 1H), 1.29 (t, *J* = 7.2 Hz, 3H). **<sup>13</sup>C{<sup>1</sup>H} NMR (126 MHz, CDCl<sub>3</sub>)** δ 171.0, 170.1, 139.1, 129.2, 128.8, 127.6, 64.6, 61.7, 28.6, 21.7, 21.2, 14.9 ppm. **HRMS (ESI)** *m/z* calculated for C<sub>14</sub>H<sub>17</sub>O<sub>4</sub><sup>+</sup> [M+H]<sup>+</sup> 249.1127, found 249.1117.

### Ethyl 2-acetoxy-2-(*o*-tolyl)cyclopropane-1-carboxylate (**5k**)

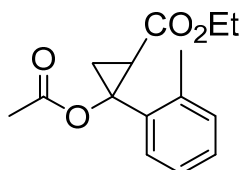

Following the general procedure D, a mixture of *cis* and *trans* isomers as colorless oil. (57 mg, 27% yield).

We were unable to separate the diastereomers, resulting in a mixture of *cis* and *trans* with ratios of 1.81:1(*trans*:*cis*) **<sup>1</sup>H NMR (400 MHz, CDCl<sub>3</sub>)** δ 7.61 (d, *J* = 6.5 Hz, 0.51H), 7.54 (dd, *J* = 7.5, 1.7 Hz, 0.51H), 7.26 – 7.06 (m, 3.34H), 4.30 – 4.16 (m, 2H), 3.96 – 3.83 (m, 1.13H), 2.51 (s, 1.59H), 2.44 (s, 2.12H), 2.33 (dd, *J* = 9.3, 7.3 Hz, 0.57H), 2.19 – 2.12 (m, 0.66H), 1.99 (t, *J* = 6.8 Hz, 0.70H), 1.94 (s, 0.39H), 1.64 (dd, *J* = 9.6, 6.8 Hz, 0.51H), 1.61 – 1.55 (m, 0.57H), 1.32 (t, *J* = 8.1 Hz, 3.77H), 0.97 (t, *J* = 7.2 Hz, 1.69H). **HRMS (ESI)** *m/z* calculated for C<sub>15</sub>H<sub>18</sub>NaO<sub>4</sub><sup>+</sup> [M+Na]<sup>+</sup> 285.1105.1127, found 285.1091.

### Ethyl (1*R*,2*S*)-2-acetoxy-2-(*m*-tolyl)cyclopropane-1-carboxylate (**5l**)

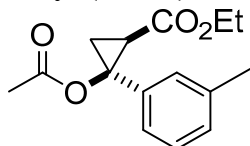

Following the general procedure D, *trans* isomer of **5l** was isolated as colorless oil. (5 mg, 2% yield).

**<sup>1</sup>H NMR (400 MHz, CDCl<sub>3</sub>)** δ 7.25 – 7.20 (m, 1H), 7.20 – 7.16 (m, 2H), 7.09 (d, *J* = 7.2 Hz, 1H), 4.19 (qt, *J* = 7.1, 1.4 Hz, 2H), 2.44 – 2.34 (m, 2H), 2.34 (s, 3H), 2.04 (s, 3H), 1.99 (ddd, *J* = 7.5, 6.4, 1.1 Hz, 1H), 1.65 (ddd, *J* = 9.3, 6.4, 1.1 Hz, 1H), 1.30 (t, *J* = 6.6 Hz, 3H). **<sup>13</sup>C{<sup>1</sup>H} NMR (126 MHz, CDCl<sub>3</sub>)** δ 171.1, 170.2, 139.0, 138.9, 129.5, 129.1, 128.2, 124.7, 64.6, 61.7,

28.5, 22.2, 21.7, 21.2, 14.9 ppm. **HRMS** (ESI)  $m/z$  calculated for  $C_{15}H_{18}NaO_4^+$   $[M+Na]^+$  285.1105.1127, found 285.1093.

#### Ethyl (1R,2S)-2-acetoxy-2-(p-tolyl)cyclopropane-1-carboxylate (**5m**)

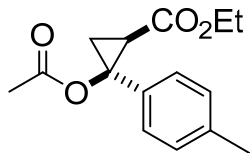

Following the general procedure D, *trans* isomer of **5m** was isolated as colorless oil. (9 mg, 4% yield).

**$^1H$  NMR** (400 MHz,  $CDCl_3$ )  $\delta$  7.39 (d,  $J = 8.0$  Hz, 2H), 7.11 (d,  $J = 7.8$  Hz, 2H), 3.92 (q,  $J = 7.1$  Hz, 2H), 2.38 (dd,  $J = 9.5, 7.3$  Hz, 1H), 2.31 (s, 3H), 2.14 (t,  $J = 7.1$  Hz, 1H), 1.95 (s, 2H), 1.60 (dd,  $J = 9.5, 6.7$  Hz, 1H), 1.02 (t,  $J = 7.1$  Hz, 3H).  **$^{13}C\{^1H\}$  NMR** (126 MHz,  $CDCl_3$ )  $\delta$  171.1, 170.2, 138.7, 136.2, 130.5, 129.8, 127.9, 64.6, 61.9, 61.7, 28.3, 21.8, 21.7, 20.9, 14.9, 14.8 ppm. **HRMS** (ESI)  $m/z$  calculated for  $C_{15}H_{18}NaO_4^+$   $[M+Na]^+$  285.1105.1127, found 285.1090.

#### Ethyl (1R,2S)-2-acetoxy-2-(4-fluorophenyl)cyclopropane-1-carboxylate (**5n**)

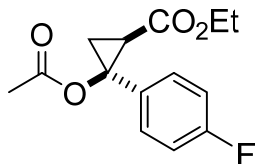

Following the general procedure D, *trans* isomer of **5n** was isolated as colorless oil. (7 mg, 10% yield).

**$^1H$  NMR** (400 MHz,  $CDCl_3$ )  $\delta$  7.47 – 7.38 (m, 2H), 7.07 – 6.97 (m, 2H), 4.24 – 4.14 (m, 2H), 2.35 (ddd,  $J = 9.3, 7.2, 4.9$  Hz, 1H), 2.01 (s, 3H), 2.00 – 1.95 (m, 1H), 1.66 – 1.55 (m, 1H), 1.30 (t,  $J = 6.1$  Hz, 3H).  **$^{13}C\{^1H\}$  NMR** (126 MHz,  $CDCl_3$ )  $\delta$  171.1, 170.0, 130.4 (d,  $J = 8.4$  Hz), 116.1 (d,  $J = 21.7$  Hz), 99.9, 64.2, 61.8, 28.1, 21.6, 20.8, 14.9 (quaternary C alpha to F and to cyclopropane not observed).  **$^{19}F$  NMR** (376 MHz,  $CDCl_3$ )  $\delta$  -113.61 (q,  $J = 3.0$  Hz). **HRMS** (ESI)  $m/z$  calculated for  $C_{14}H_{16}FO_4^+$   $[M+H]^+$  267.1032, found 267.1021.

NOE Enhancements

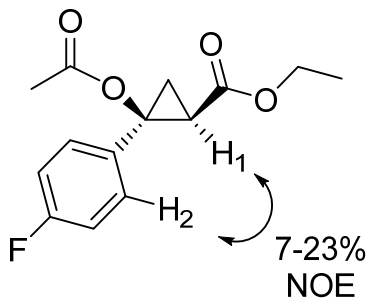

Major diastereomer

$^1\text{H NMR}$  (400 MHz,  $\text{CDCl}_3$ )  $\delta$  7.03 (t,  $J = 8.5$  Hz, 3H), 4.20 (q,  $J = 7.1$  Hz, 2H), 2.47 – 2.24 (m, 1H), 2.01 (d,  $J = 9.0$  Hz, 4H), 1.62 (dd,  $J = 9.3, 6.5$  Hz, 1H), 1.31 (t,  $J = 7.1$  Hz, 3H).

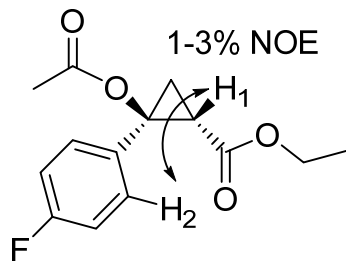

Minor diastereomer

$^1\text{H NMR}$  (400 MHz,  $\text{CDCl}_3$ )  $\delta$  7.01 (t,  $J = 8.5$  Hz, 2H), 3.94 (q,  $J = 7.1$  Hz, 2H), 2.41 (t,  $J = 8.4$  Hz, 1H), 2.14 (t,  $J = 7.1$  Hz, 1H), 1.97 (s, 3H), 1.64 (dd,  $J = 9.6, 6.8$  Hz, 1H), 1.04 (t,  $J = 7.1$  Hz, 3H).

#### Ethyl (1R,2S)-2-acetoxy-2-(4-bromophenyl)cyclopropane-1-carboxylate (**5o**)

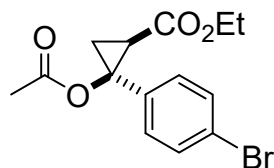

Following the general procedure D, *trans* isomer of **5o** was isolated as a yellow oil.

$^1\text{H NMR}$  (400 MHz,  $\text{CDCl}_3$ )  $\delta$  7.46 (d,  $J = 8.6$  Hz, 2H), 7.27 (d,  $J = 7.8$  Hz, 2H), 4.18 (qd,  $J = 6.5, 3.4$  Hz, 2H), 2.36 (dd,  $J = 9.3, 7.4$  Hz, 1H), 2.07 – 1.95 (m, 4H), 1.61 (dd,  $J = 9.3, 6.5$  Hz, 1H), 1.29 (t,  $J = 7.1$  Hz, 3H).  $^{13}\text{C}\{^1\text{H}\}$  NMR (126 MHz,  $\text{CDCl}_3$ )  $\delta$  171.0, 169.8, 138.2, 132.3, 129.6, 122.9, 64.1, 61.9, 28.4, 21.6, 20.9, 14.9. HRMS (ESI)  $m/z$  calculated for  $\text{C}_{14}\text{H}_{16}\text{BrO}_4^+$   $[\text{M}+\text{H}]^+$  327.0232, found 327.0219.

#### Ethyl (1R,2S)-2-acetoxy-2-(4-(trifluoromethyl)phenyl)cyclopropane-1-carboxylate (**5p**)

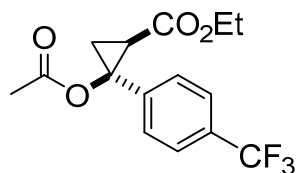

Following the general procedure D, *trans* isomer of **5p** was isolated as colorless oil. (6 mg, 9% yield).

$^1\text{H NMR}$  (400 MHz,  $\text{CDCl}_3$ )  $\delta$  7.60 (d,  $J = 8.2$  Hz, 2H), 7.46 (d,  $J = 8.1$  Hz, 2H), 4.20 (q,  $J = 7.1$  Hz, 2H), 2.48 – 2.39 (m, 1H), 2.11 – 2.03 (m, 4H), 1.68 (ddd,  $J = 9.3, 6.6, 1.0$  Hz, 1H), 1.30

(t,  $J = 7.1$  Hz, 3H).  $^{13}\text{C}\{^1\text{H}\}$  NMR (126 MHz,  $\text{CDCl}_3$ )  $\delta$  171.0, 169.6, 143.1, 130.9 (d,  $J = 32.7$  Hz), 127.6, 126.2 (q,  $J = 3.7$  Hz), 63.8, 61.9, 30.4, 28.9, 21.5, 21.4, 14.9 (quaternary C alpha to - $\text{CF}_3$  not observed).  $^{19}\text{F}\{^1\text{H}\}$  NMR (376 MHz,  $\text{CDCl}_3$ )  $\delta$  -62.87 ppm. HRMS (ESI)  $m/z$  calculated for  $\text{C}_{15}\text{H}_{16}\text{F}_3\text{O}_4^+$   $[\text{M}+\text{H}]^+$  317.0996, found 317.0987.

### Ethyl (1R,2S)-2-acetoxy-2-(4-methoxyphenyl)cyclopropane-1-carboxylate (5q)

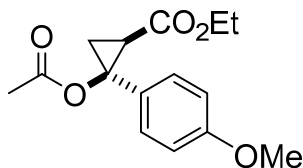

Following the general procedure D, *trans* isomer of **5q** was isolated as colorless oil. (9 mg, 6% yield).

$^1\text{H}$  NMR (400 MHz,  $\text{CDCl}_3$ )  $\delta$  7.39 (d,  $J = 8.0$  Hz, 2H), 6.86 (d,  $J = 8.6$  Hz, 2H), 4.24 – 4.11 (m, 2H), 3.79 (s, 3H), 2.34 (ddd,  $J = 10.4, 8.0, 2.4$  Hz, 1H), 2.03 – 1.92 (m, 4H), 1.64 – 1.54 (m, 1H), 1.30 (t,  $J = 7.1$  Hz, 3H).  $^{13}\text{C}\{^1\text{H}\}$  NMR (126 MHz,  $\text{CDCl}_3$ )  $\delta$  171.1, 170.3, 160.2, 131.3, 130.0, 114.5, 64.6, 61.7, 56.0, 28.0, 21.7, 20.7, 14.9 ppm. HRMS (ESI)  $m/z$  calculated for  $\text{C}_{15}\text{H}_{19}\text{O}_5^+$   $[\text{M}+\text{H}]^+$  279.1232, found 279.1220.

### (1S,2R)-2-cyanocyclopropyl benzoate (7a)

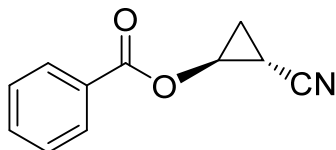

Following the general procedure E, *trans* isomer of **7a** was isolated as a white solid. (133 mg, 53% yield).

$^1\text{H}$  NMR (500 MHz,  $\text{CDCl}_3$ )  $\delta$  7.97 (dt,  $J = 8.5, 1.1$  Hz, 2H), 7.60 (td,  $J = 7.4, 1.3$  Hz, 1H), 7.45 (ddd,  $J = 8.7, 7.5, 1.2$  Hz, 2H), 4.74 (ddt,  $J = 6.8, 4.9, 2.7$  Hz, 1H), 1.84 – 1.75 (m, 1H), 1.64 – 1.53 (m, 2H).  $^{13}\text{C}\{^1\text{H}\}$  NMR (126 MHz,  $\text{CDCl}_3$ )  $\delta$  166.8, 134.5, 130.4, 129.3, 119.4, 53.4, 14.5, 5.3. HRMS (ESI)  $m/z$  calculated for  $\text{C}_{11}\text{H}_{10}\text{NO}_2^+$   $[\text{M}+\text{H}]^+$  188.0707, found 188.0705.

### Ethyl phenylglycinate (8a)

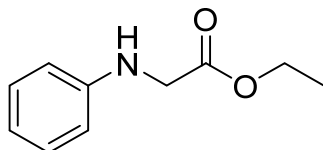

Following the general procedure D, **8a** was isolated as a colorless oil. (41 mg, 43% yield).

The analytical data are in accord with those reported in literature.<sup>4</sup>

**<sup>1</sup>H NMR (500 MHz, CDCl<sub>3</sub>)** δ 7.19 (td, *J* = 8.7, 2.5 Hz, 2H), 6.75 (t, *J* = 7.3 Hz, 1H), 6.61 (dd, *J* = 8.7, 2.2 Hz, 2H), 4.24 (q, *J* = 7.1 Hz, 2H), 3.89 (s, 2H), 1.29 (t, *J* = 7.1 Hz, 3H)

**Ethyl phenylalaninate (8b)**

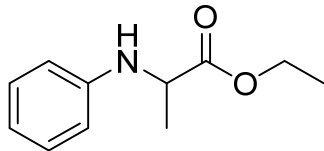

Following the general procedure D, **8b** was isolated as a colorless oil. (39 mg, 38% yield).

The analytical data are in accord with those reported in literature.<sup>4</sup>

**<sup>1</sup>H NMR (500 MHz, CDCl<sub>3</sub>)** δ 7.17 (td, *J* = 7.3, 1.4 Hz, 2H), 6.74 (td, *J* = 7.3, 1.0 Hz, 1H), 6.61 (d, *J* = 8.6 Hz, 2H), 4.18 (q, *J* = 7.1 Hz, 2H), 4.13 (q, *J* = 6.9 Hz, 1H), 1.47 (d, *J* = 6.9 Hz, 2H), 1.25 (t, *J* = 7.1 Hz, 3H).

**Ethyl 2-(phenylthio)acetate (9a)**

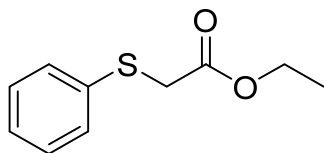

Following the general procedure D, **9a** was isolated as a colorless oil. (44 mg, 50% yield).

The analytical data are in accord with those reported in literature.<sup>5</sup>

**<sup>1</sup>H NMR (500 MHz, CDCl<sub>3</sub>)** δ 7.46 – 7.31 (m, 2H), 7.32 – 7.25 (m, 2H), 7.25 – 7.19 (m, 1H), 4.14 (q, *J* = 7.1 Hz, 2H), 3.62 (s, 2H), 1.20 (t, *J* = 7.1 Hz, 3H).

**Ethyl 2-(phenylthio)propanoate (9b)**

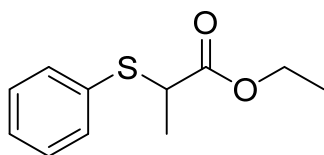

Following the general procedure D, **9b** was isolated as a colorless oil. The analytical data are in accord with those reported in literature.<sup>5</sup>

**<sup>1</sup>H NMR (400 MHz, CDCl<sub>3</sub>)** δ 7.46 (d, *J* = 6.8 Hz, 2H) 7.31-7.28 (m, 3H), 4.13 (q, *J* = 7.2 Hz, 2H), 3.80 (q, *J* = 7.2 Hz, 1H), 1.48 (d, *J* = 7.2 Hz, 3H), 1.18 (t, *J* = 7.2 Hz, 3H) ppm

### Ethyl (S)-2-(phenylthio)pent-4-enoate (**10a**)

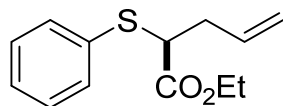

Following the general procedure D, **10a** was isolated as a colorless oil. (26 mg, 21% yield).

The analytical data are in accord with those reported in literature.<sup>6</sup>

**<sup>1</sup>H NMR (500 MHz, CDCl<sub>3</sub>)**  $\delta$  7.49 – 7.42 (m, 2H), 7.35 – 7.22 (m, 3H), 5.79 (ddt,  $J = 17.1, 10.2, 6.9$  Hz, 1H), 5.18 – 5.02 (m, 2H), 4.10 (pq,  $J = 6.4, 4.0$  Hz, 2H), 3.68 (dd,  $J = 8.7, 6.3$  Hz, 1H), 2.61 (dddt,  $J = 15.6, 8.3, 7.0, 1.3$  Hz, 1H), 2.50 (dt,  $J = 14.3, 6.3, 1.3$  Hz, 1H), 1.15 (t,  $J = 7.1$  Hz, 3H).

### 2-hydroxy-2-isopropylcyclopropane-1-carboxylic acid (**11**)

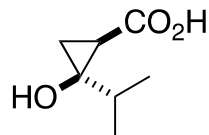

Following the general procedure F, **11** was isolated as a colorless oil. (2 mg, 29% yield).

**<sup>1</sup>H NMR (500 MHz, CDCl<sub>3</sub>)**  $\delta$  3.86 (s, 2H), 2.77 (s, 2H), 2.63 (d,  $J = 6.7$  Hz, 2H), 1.12 (d,  $J = 6.9$  Hz, 6H). **<sup>13</sup>C{<sup>1</sup>H} NMR (126 MHz, CDCl<sub>3</sub>)**  $\delta$  166.2, 40.8, 34.7, 32.9, 29.7, 1 **HRMS (ESI)**  $m/z$  calculated for C<sub>7</sub>H<sub>13</sub>O<sub>3</sub><sup>+</sup> [M+H]<sup>+</sup> 145.0865, found 145.0854.

# NMR Spectra

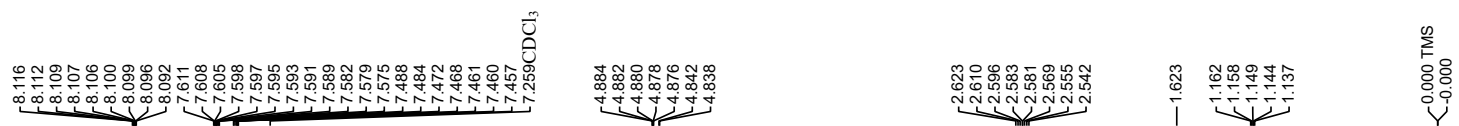

4e. 3-Methylbut-1-en-2-yl Benzoate  
<sup>1</sup>H NMR (500 MHz, CDCl<sub>3</sub>)

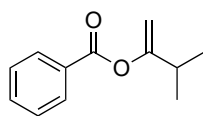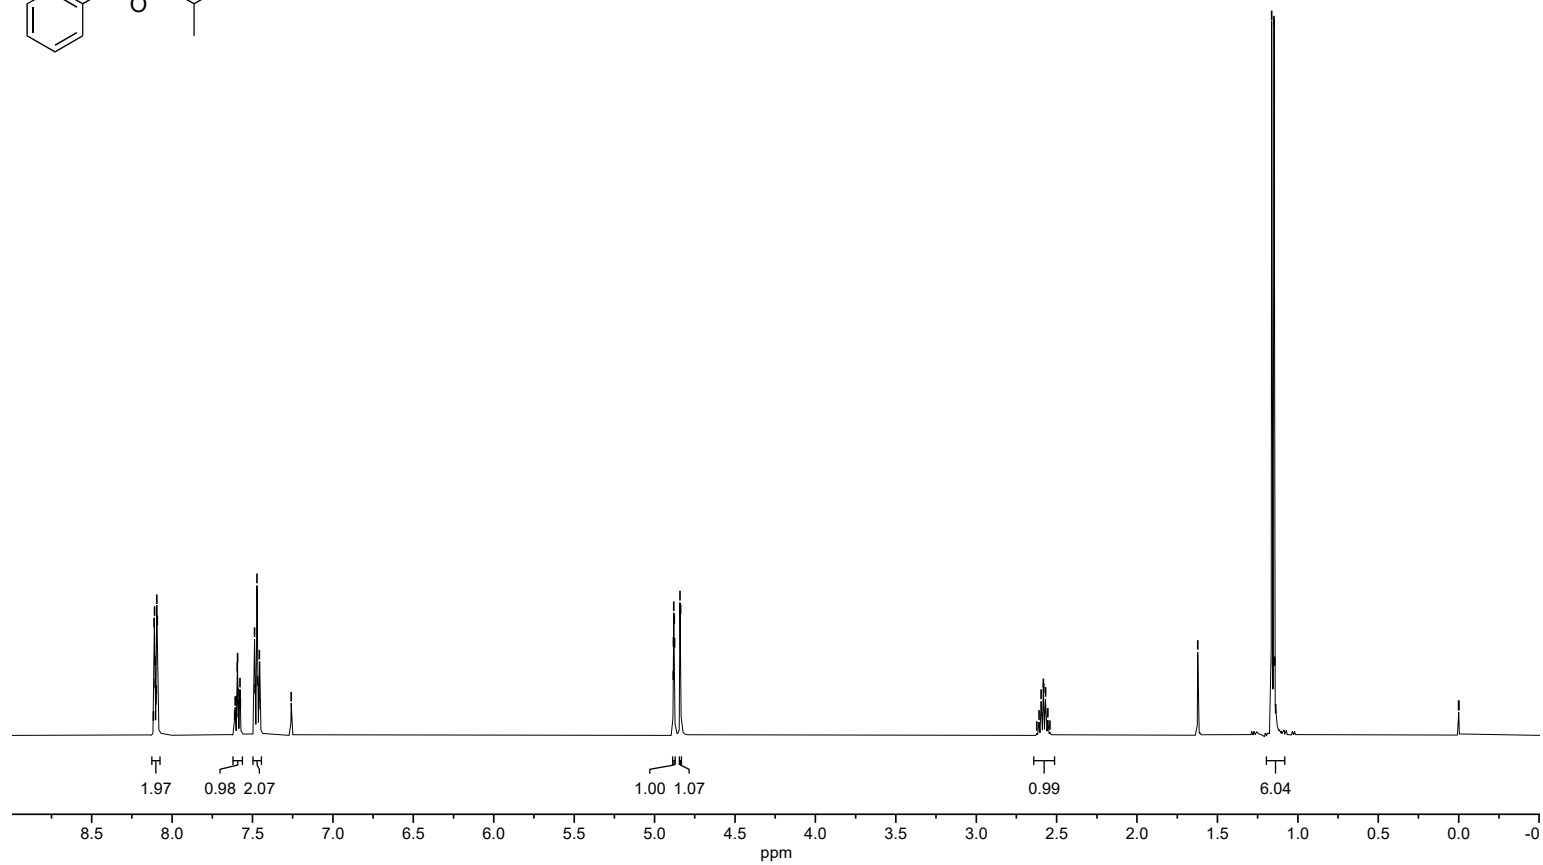



**4e. 3-Methylbut-1-en-2-yl Benzoate**  
 $^{13}\text{C}\{^1\text{H}\}$  NMR (126 MHz,  $\text{CDCl}_3$ )

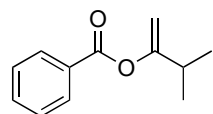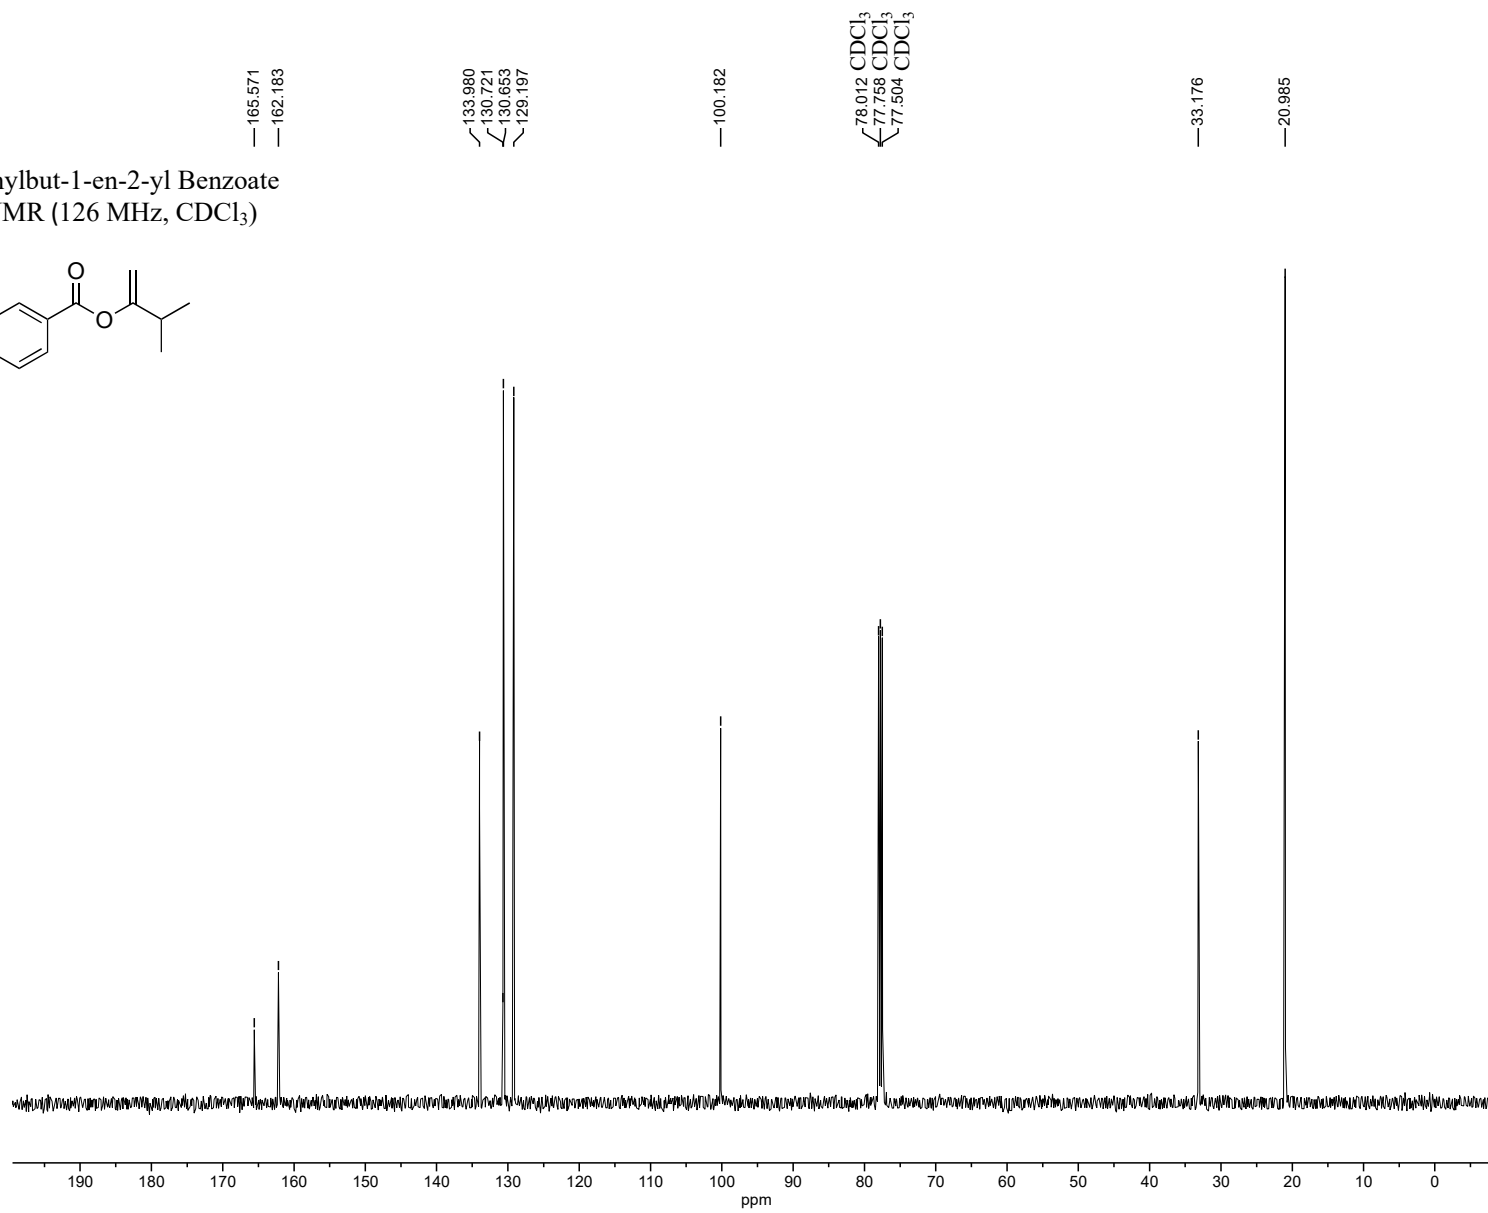

8.105  
8.102  
8.099  
8.096  
8.089  
8.085  
8.082  
7.610  
7.607  
7.605  
7.596  
7.592  
7.589  
7.580  
7.578  
7.575  
7.486  
7.482  
7.470  
7.458  
7.455  
7.261CDCl<sub>3</sub>  
4.908  
4.905  
4.902  
4.842  
4.838  
4.830  
2.790  
2.775  
2.768  
2.757  
1.926  
1.924  
1.919  
1.917  
1.914  
1.912  
1.909  
1.906  
1.903  
1.899  
1.897  
1.891  
1.888  
1.884  
1.878  
1.875  
1.871  
1.871  
1.724  
1.719  
1.714  
1.709  
1.706  
1.703  
1.699  
1.696  
1.687  
1.684  
1.678  
1.672  
1.670  
1.631  
1.627  
1.620  
1.616  
1.614  
1.610  
1.605  
1.598  
1.596  
1.590  
1.586  
1.583  
1.581  
1.577  
1.573  
1.567  
1.564  
1.562  
1.556  
1.553  
1.550  
0.000 TMS

**4g.** 1-Cyclopentylvinyl Benzoate  
<sup>1</sup>H NMR (500 MHz, CDCl<sub>3</sub>)

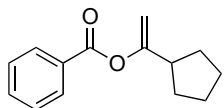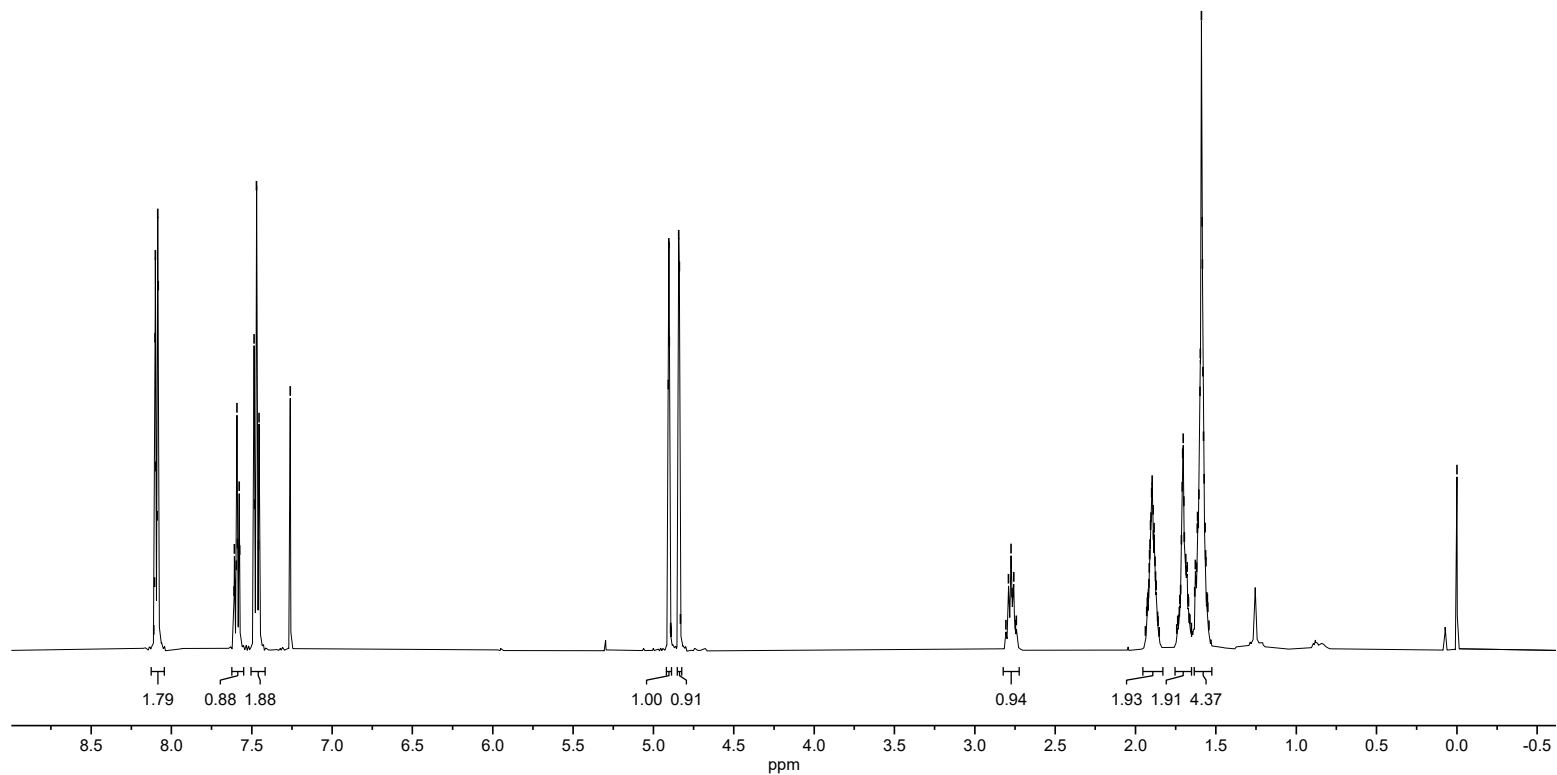

**4g.** 1-Cyclopentylvinyl Benzoate  
 $^{13}\text{C}\{^1\text{H}\}$  NMR (126 MHz,  $\text{CDCl}_3$ )

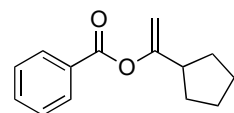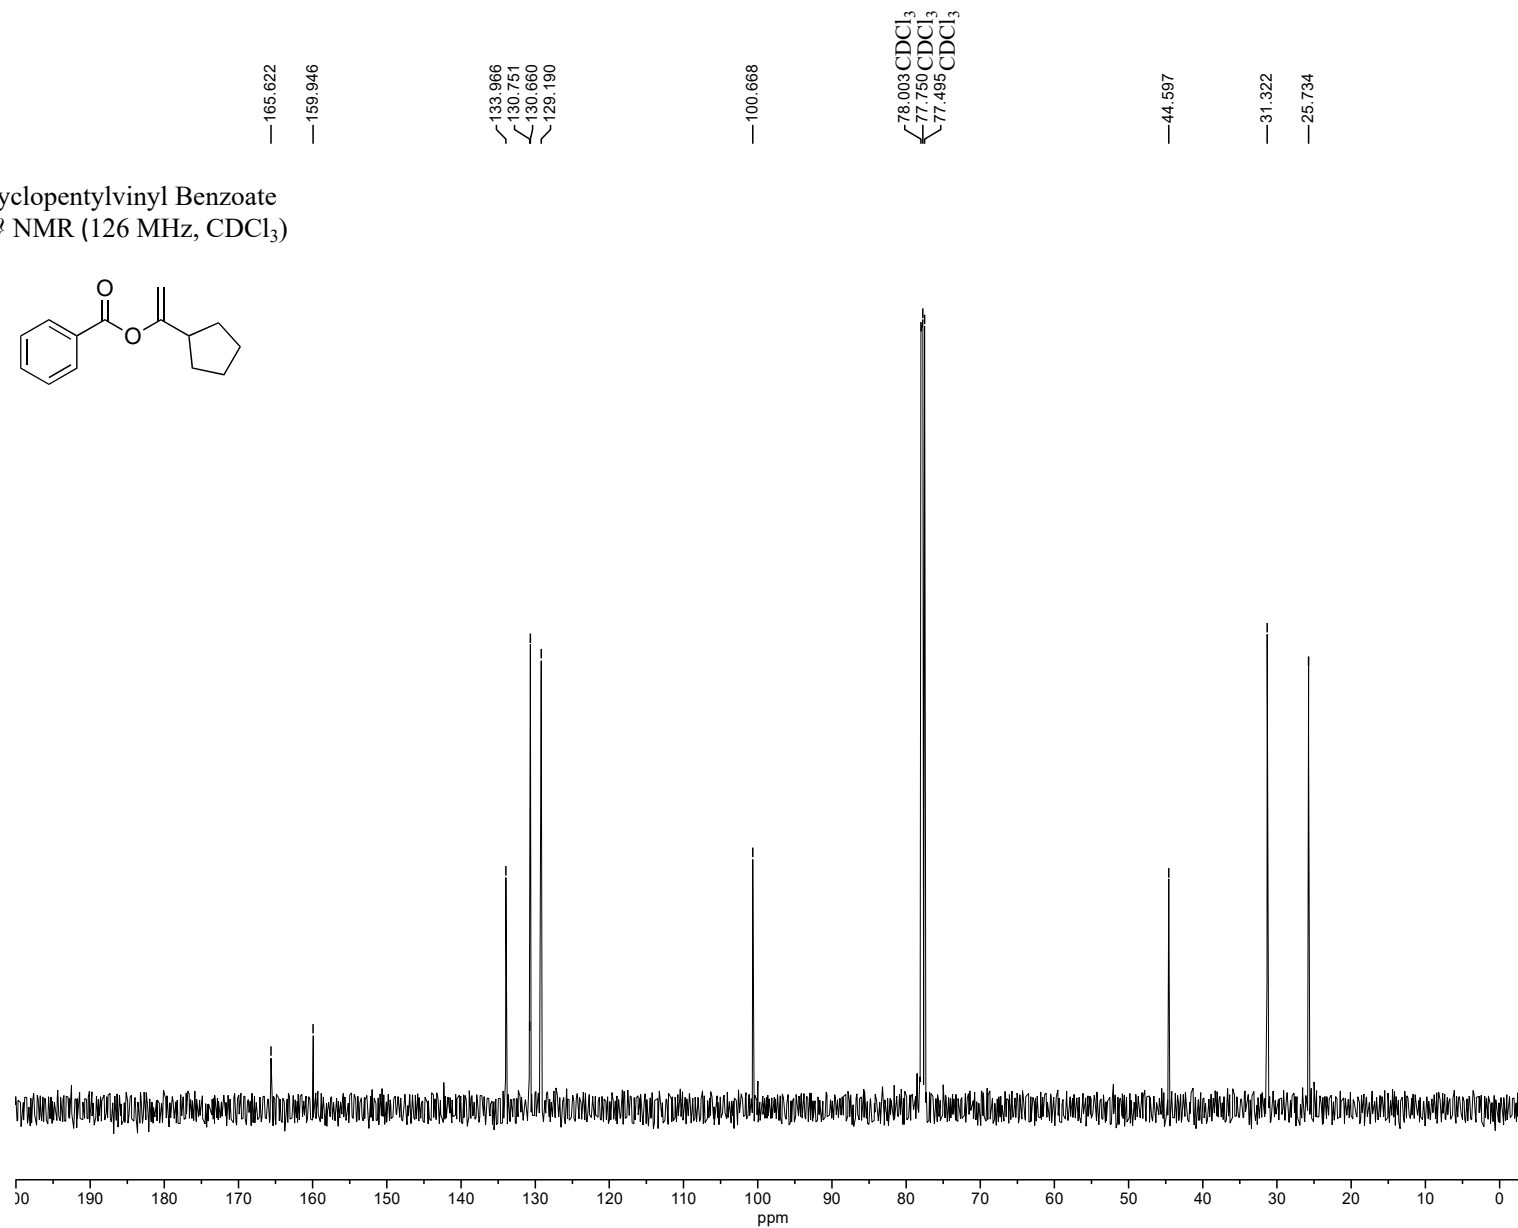

7.908  
7.902  
7.898  
7.894  
7.885  
7.882  
7.878  
7.261 CDCl<sub>3</sub>  
7.228  
7.215  
7.212

— 5.300 CH<sub>2</sub>Cl<sub>2</sub>

4.524  
4.514  
4.510  
4.500  
4.496  
4.486  
4.140  
4.132  
4.131  
4.123  
4.118  
4.116  
4.104  
4.102  
4.094  
4.089

2.398  
2.077  
2.063  
2.059  
2.049  
2.045  
2.031  
2.019  
1.748  
1.738  
1.734  
1.725  
1.721  
1.711  
1.562  
1.375  
1.362  
1.357  
1.348  
1.344  
1.331  
1.216  
1.210  
1.206  
1.202  
1.192  
1.178  
0.000 TMS

**5b.** (1*S*,2*S*)-2-(ethoxycarbonyl)cyclopropyl 4-methylbenzoate  
<sup>1</sup>H NMR (500 MHz, CDCl<sub>3</sub>)

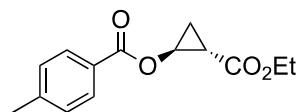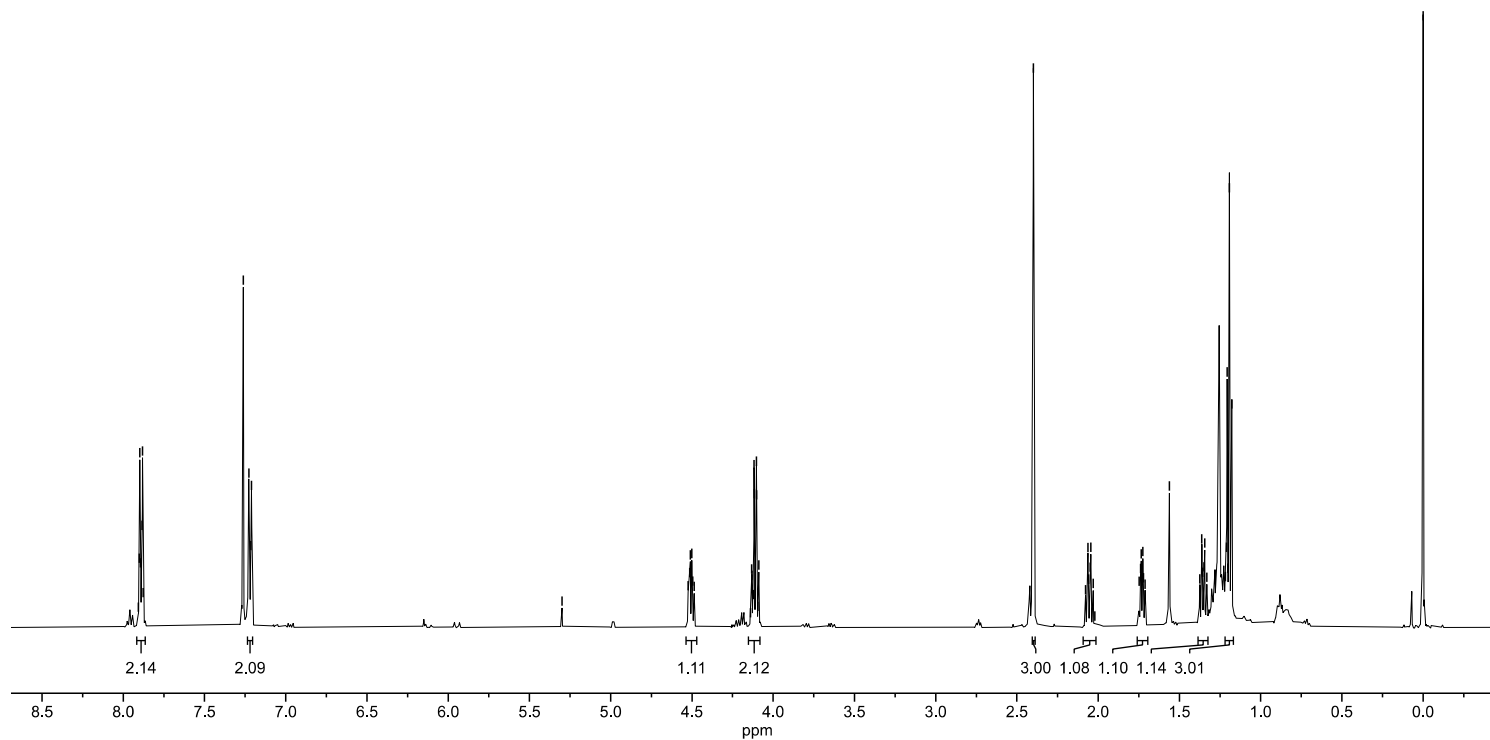

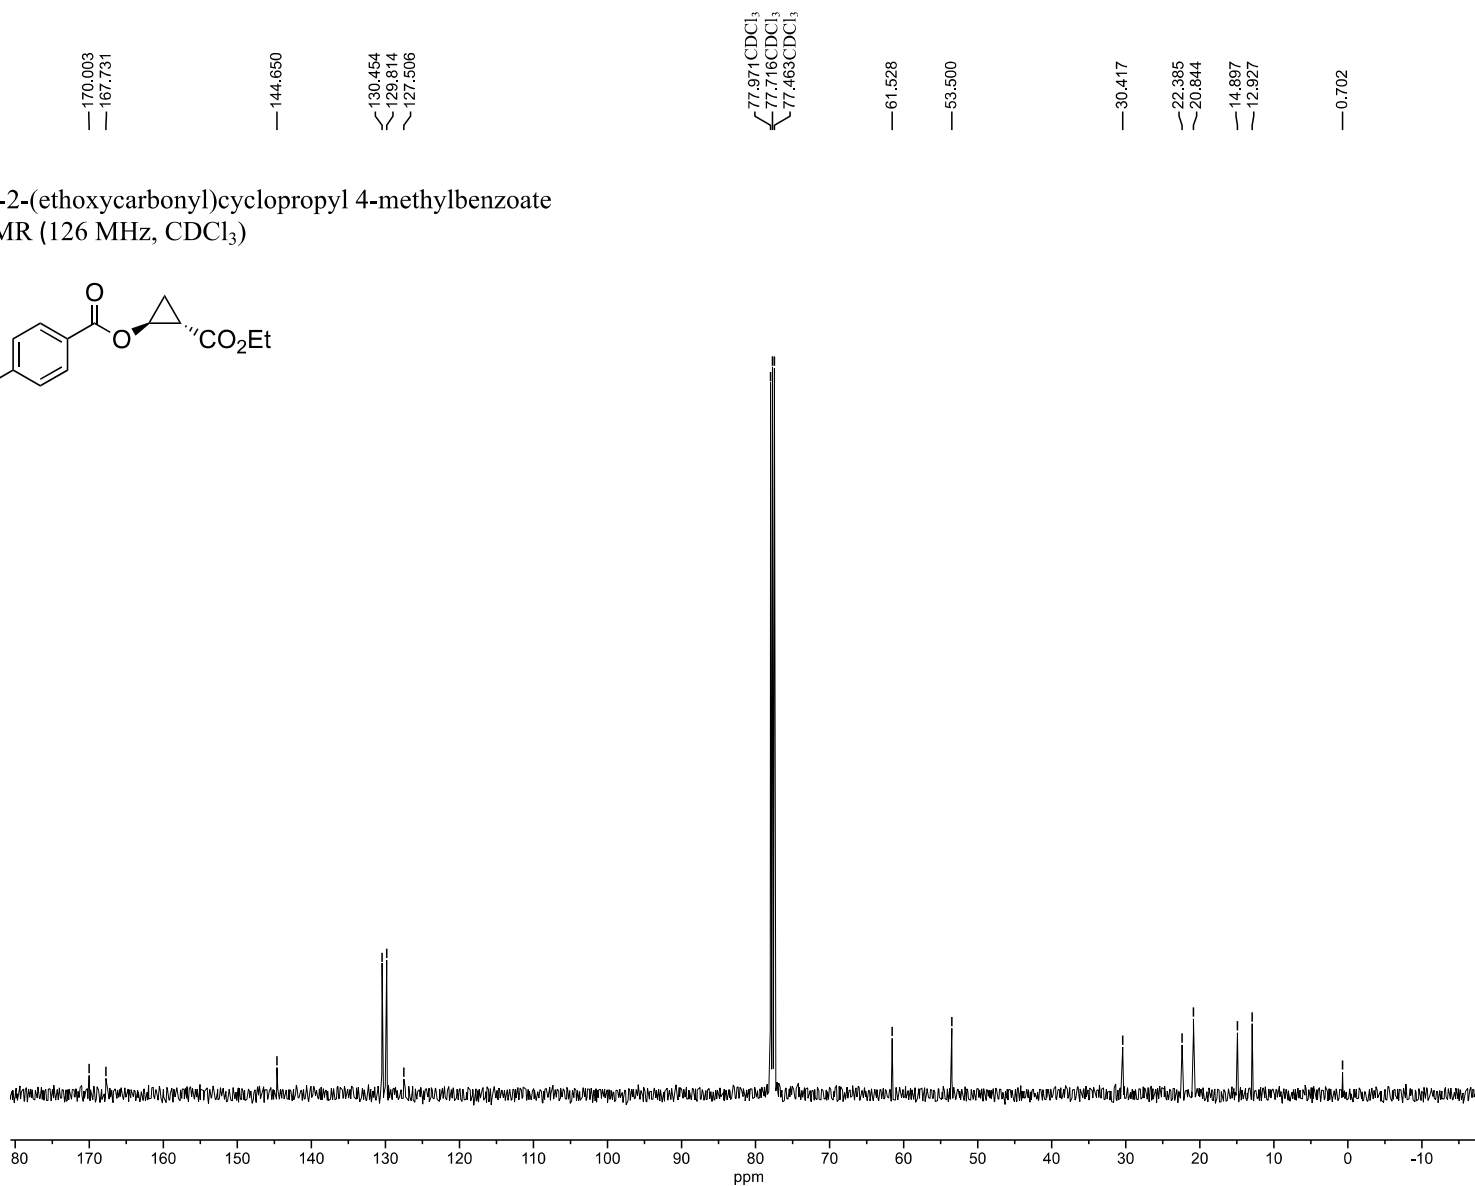

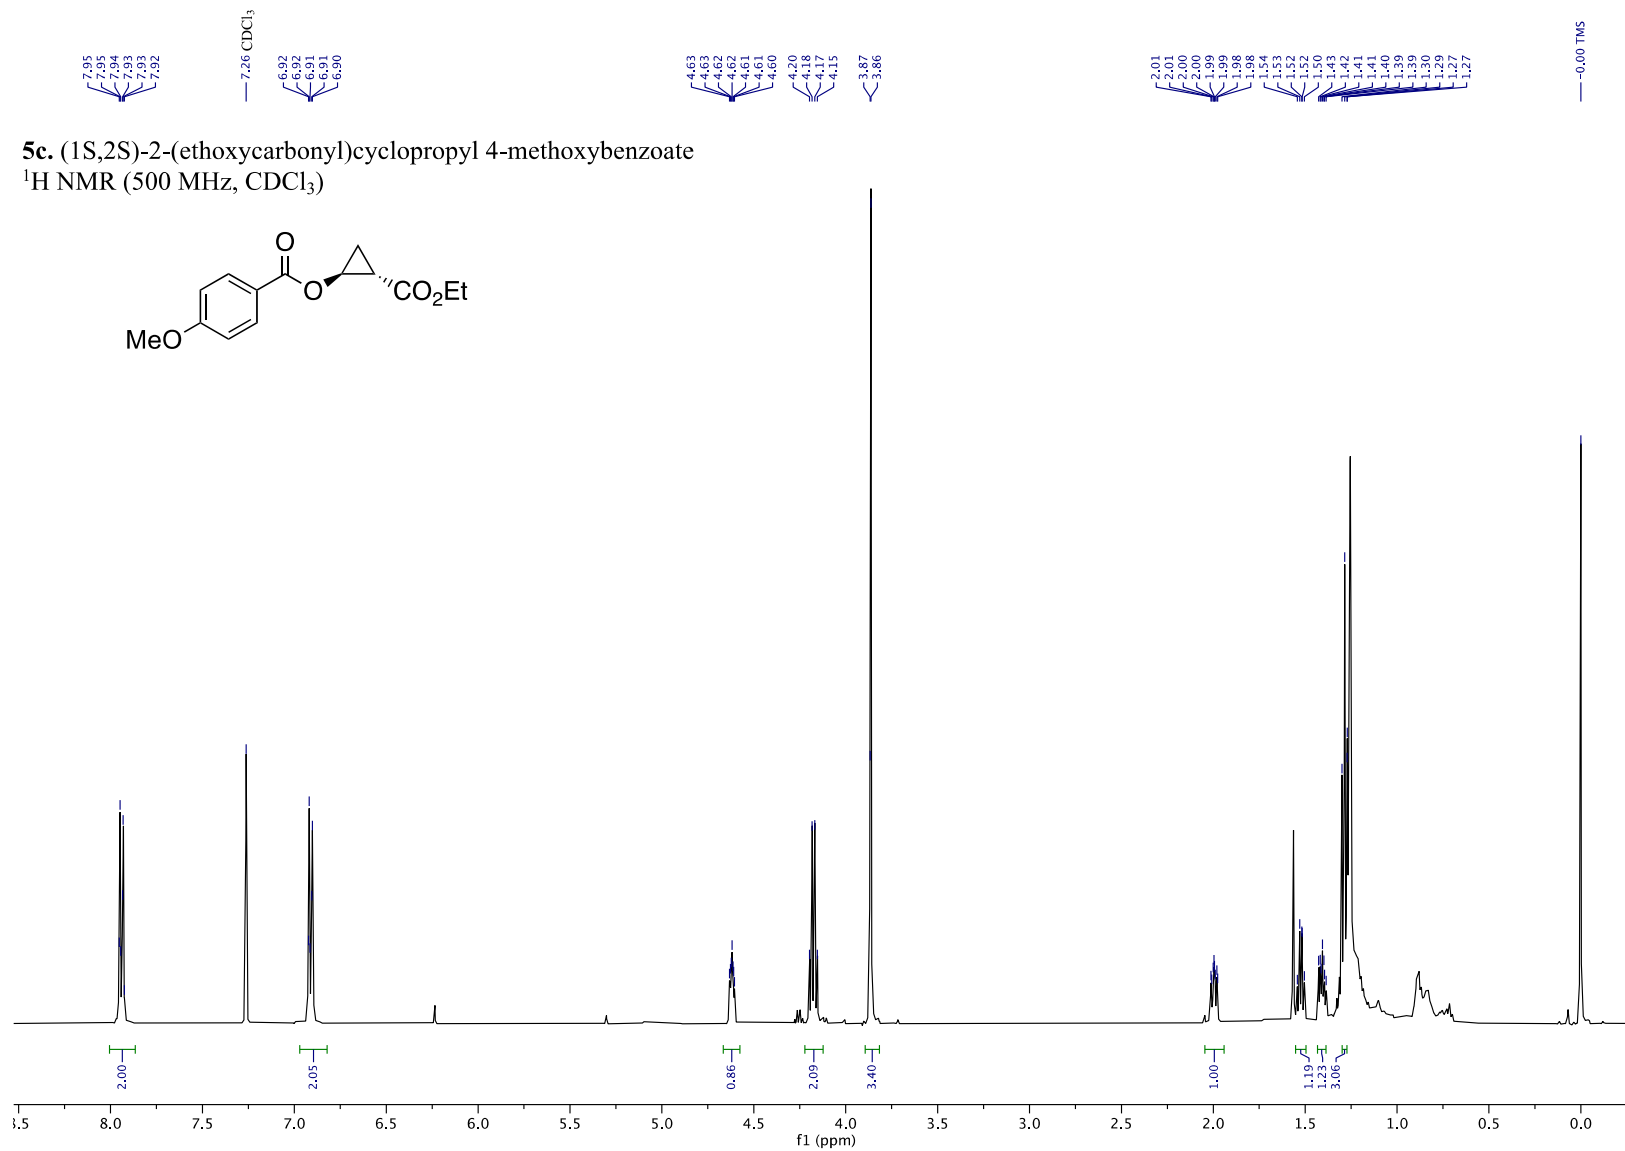

**5c.** (1*S*,2*S*)-2-(ethoxycarbonyl)cyclopropyl 4-methoxybenzoate  
 $^{13}\text{C}\{^1\text{H}\}$  NMR (126 MHz,  $\text{CDCl}_3$ )

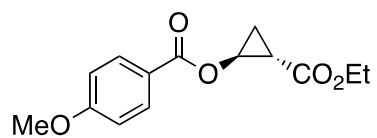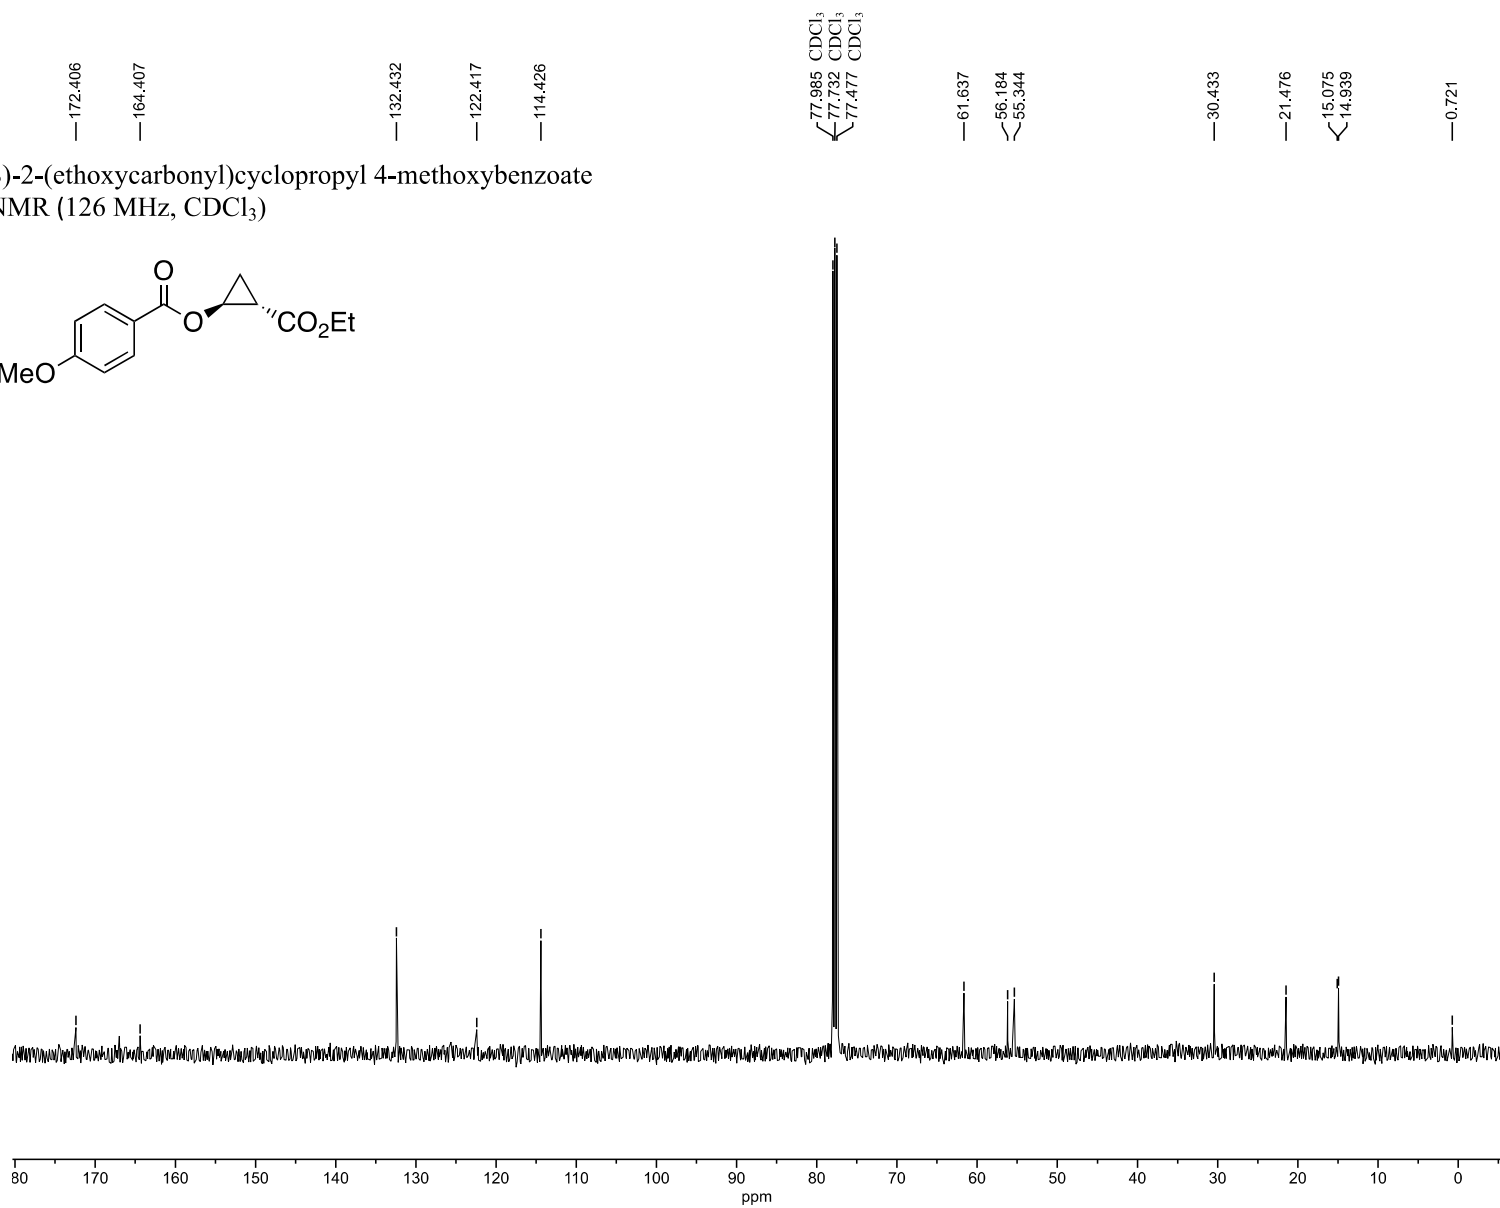

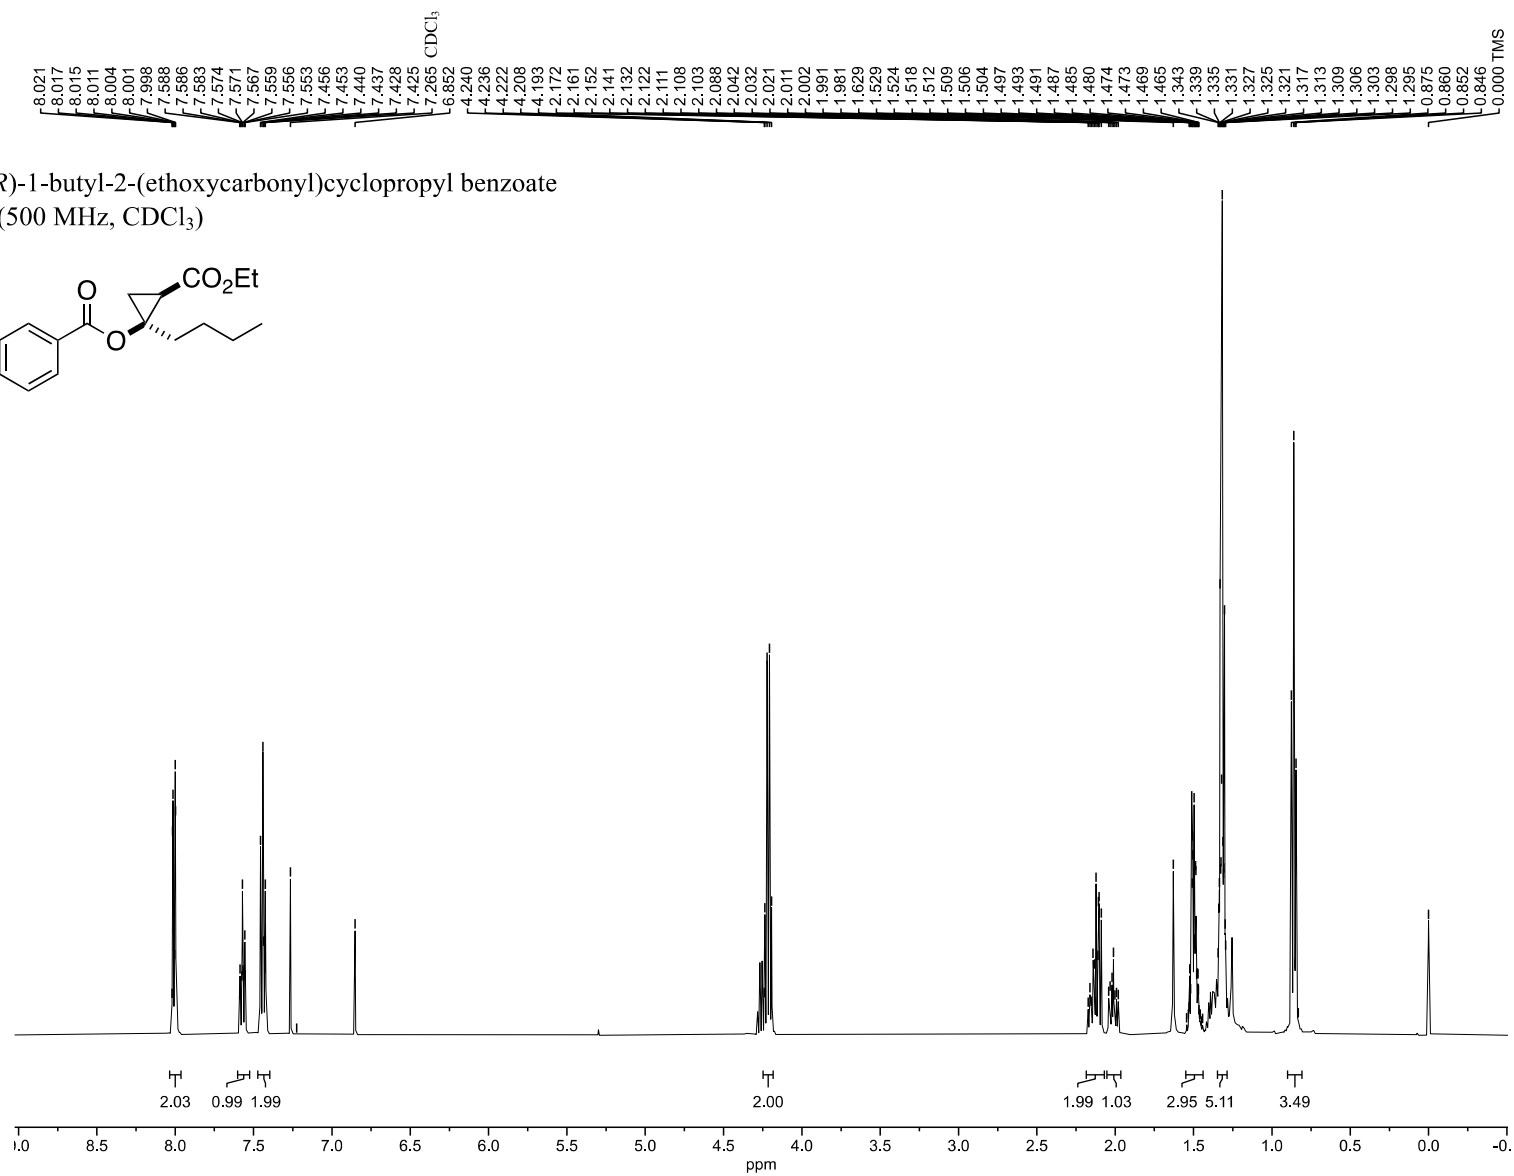



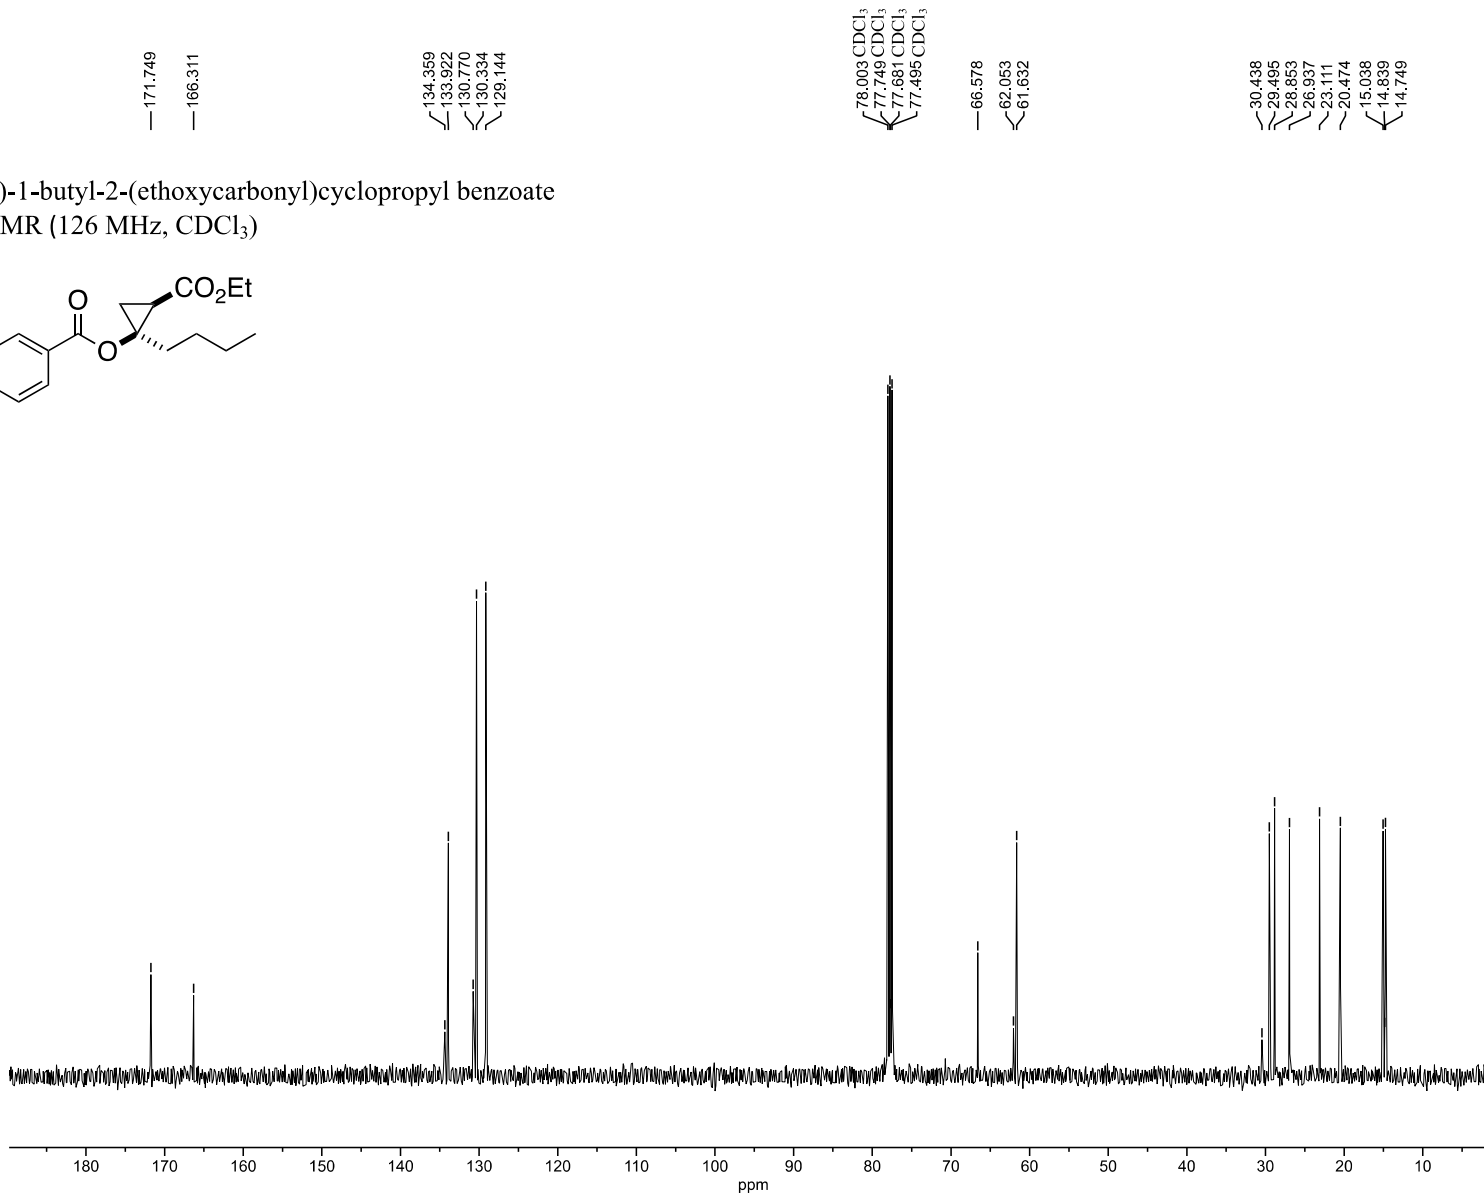

**5e.** (1R,2R)-2-(ethoxycarbonyl)-1-isopropylcyclopropyl benzoate  
<sup>1</sup>H NMR (500 MHz, CDCl<sub>3</sub>)

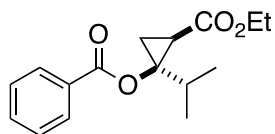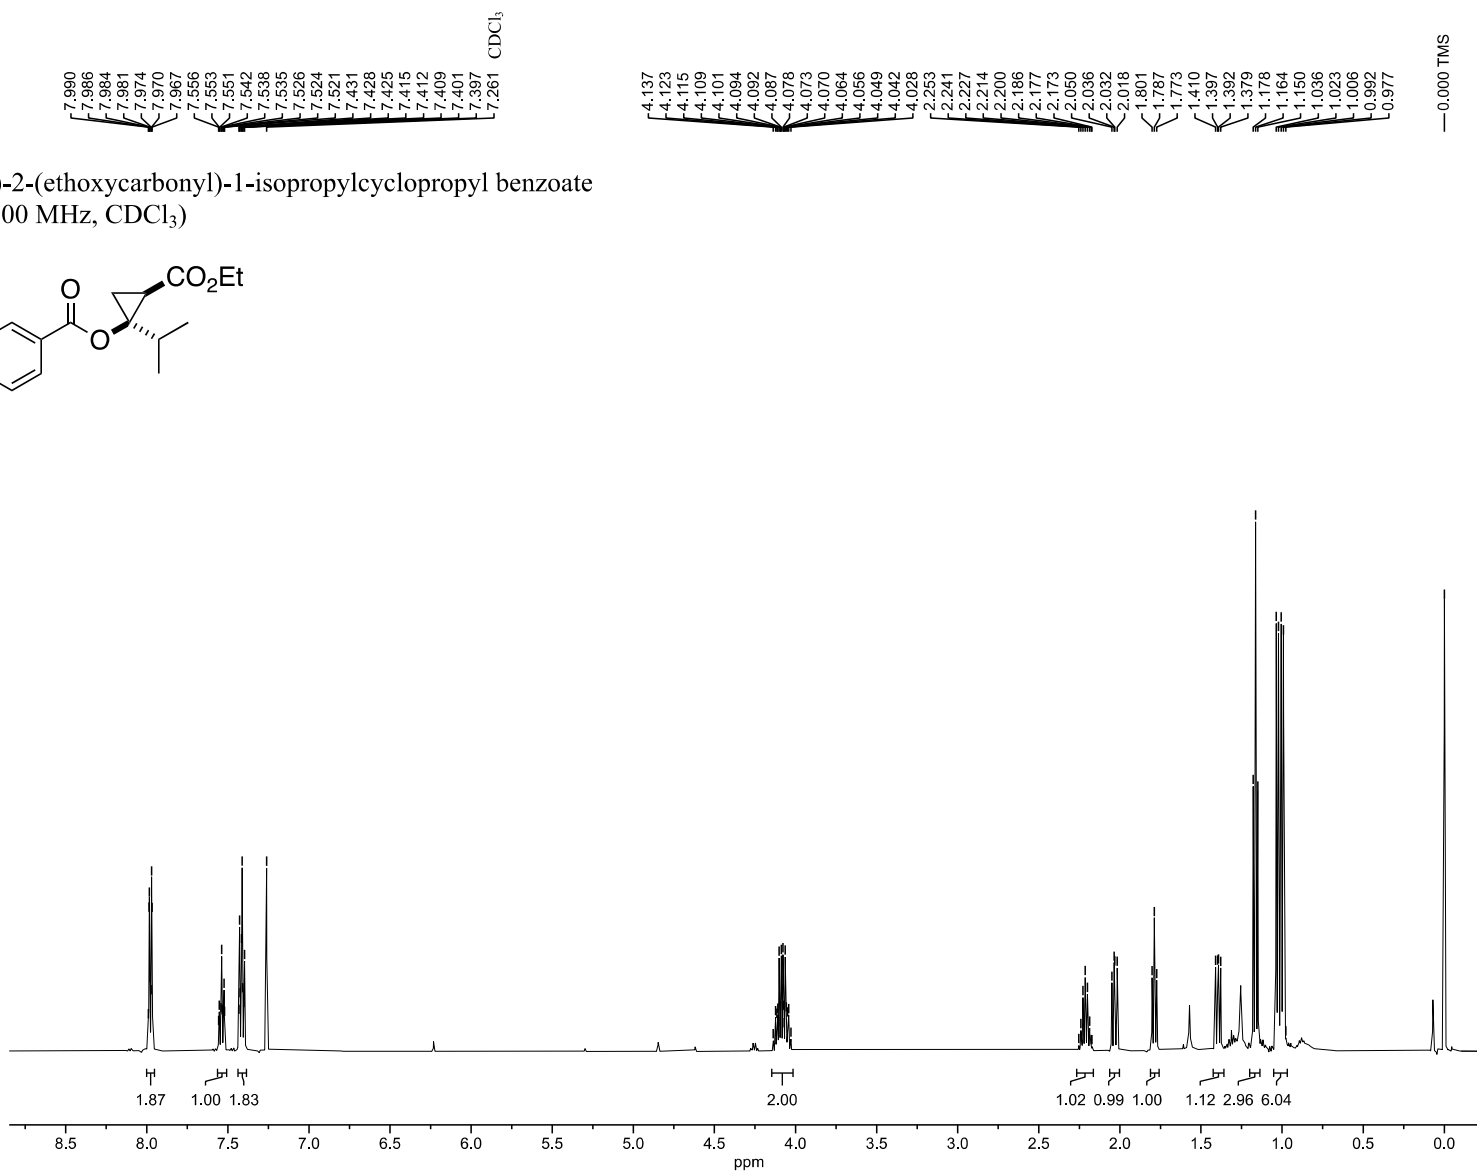

**5e.** (1R,2R)-2-(ethoxycarbonyl)-1-isopropylcyclopropyl benzoate  
 $^{13}\text{C}\{^1\text{H}\}$  NMR (126 MHz,  $\text{CDCl}_3$ )

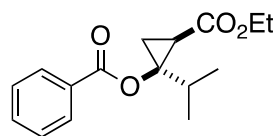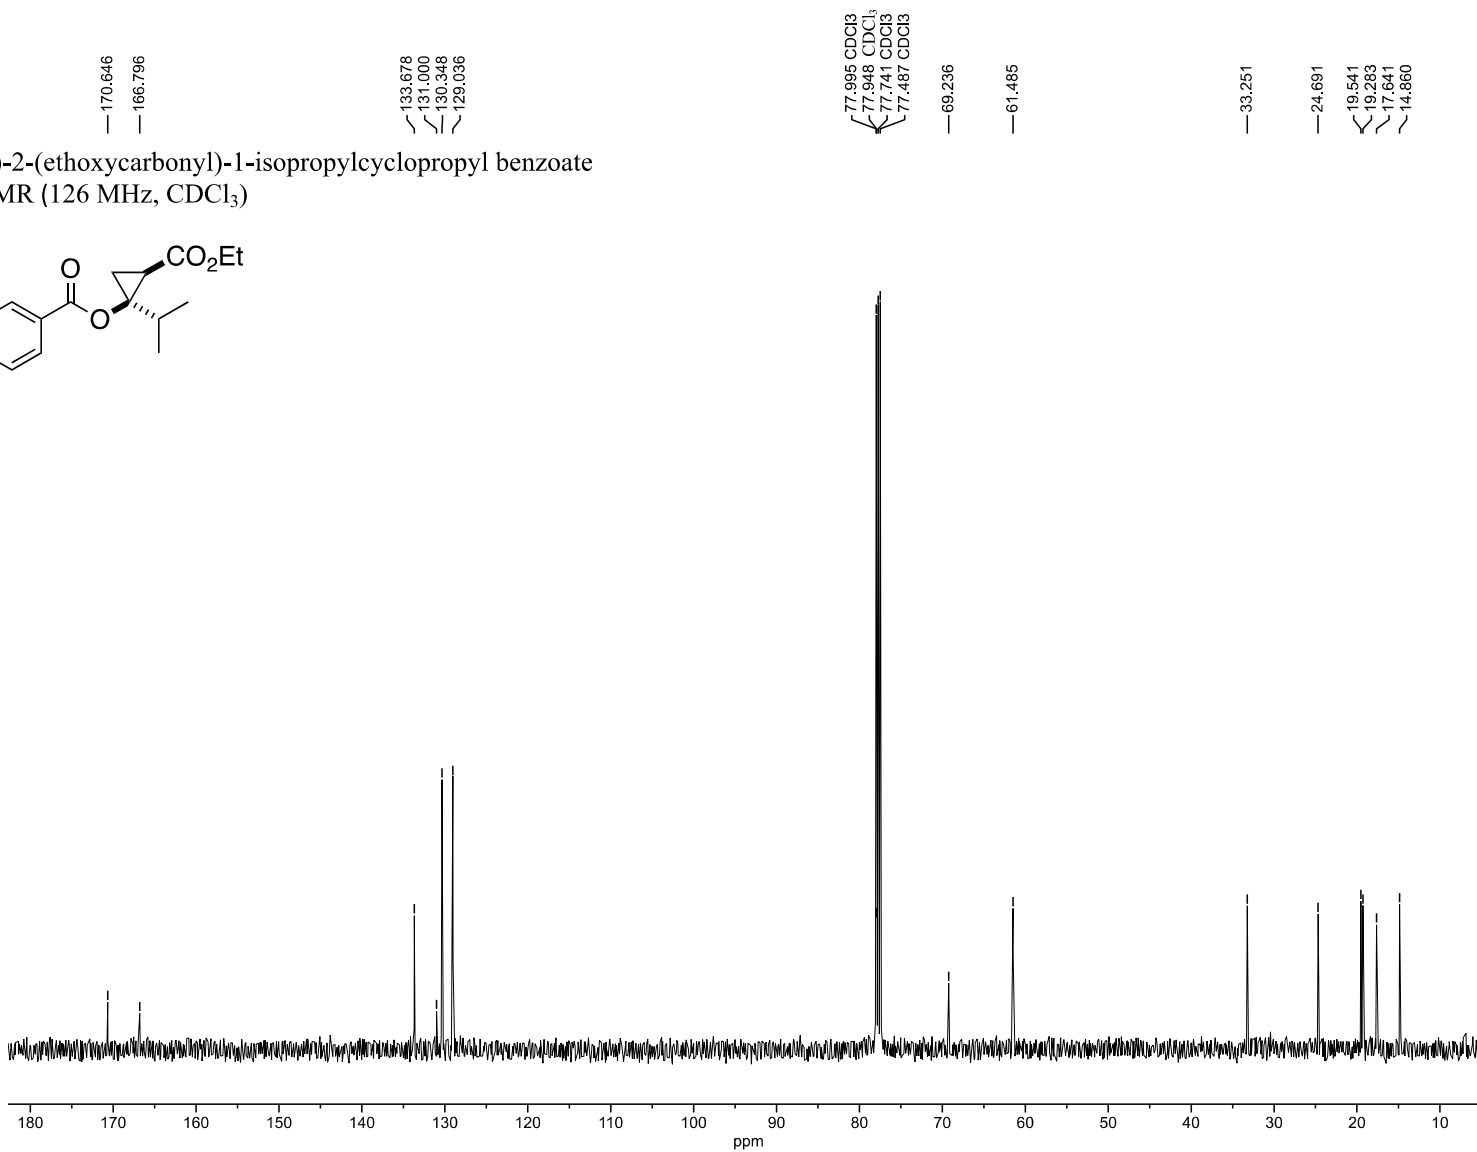

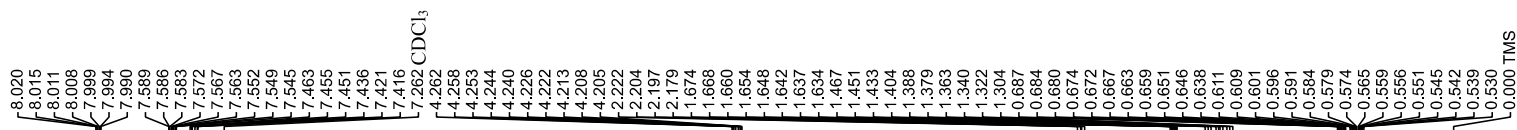

**5f.** (1R,2R)-2-(ethoxycarbonyl)-[1,1'-bi(cyclopropan)]-1-yl benzoate  
<sup>1</sup>H NMR (500 MHz, CDCl<sub>3</sub>)

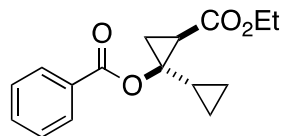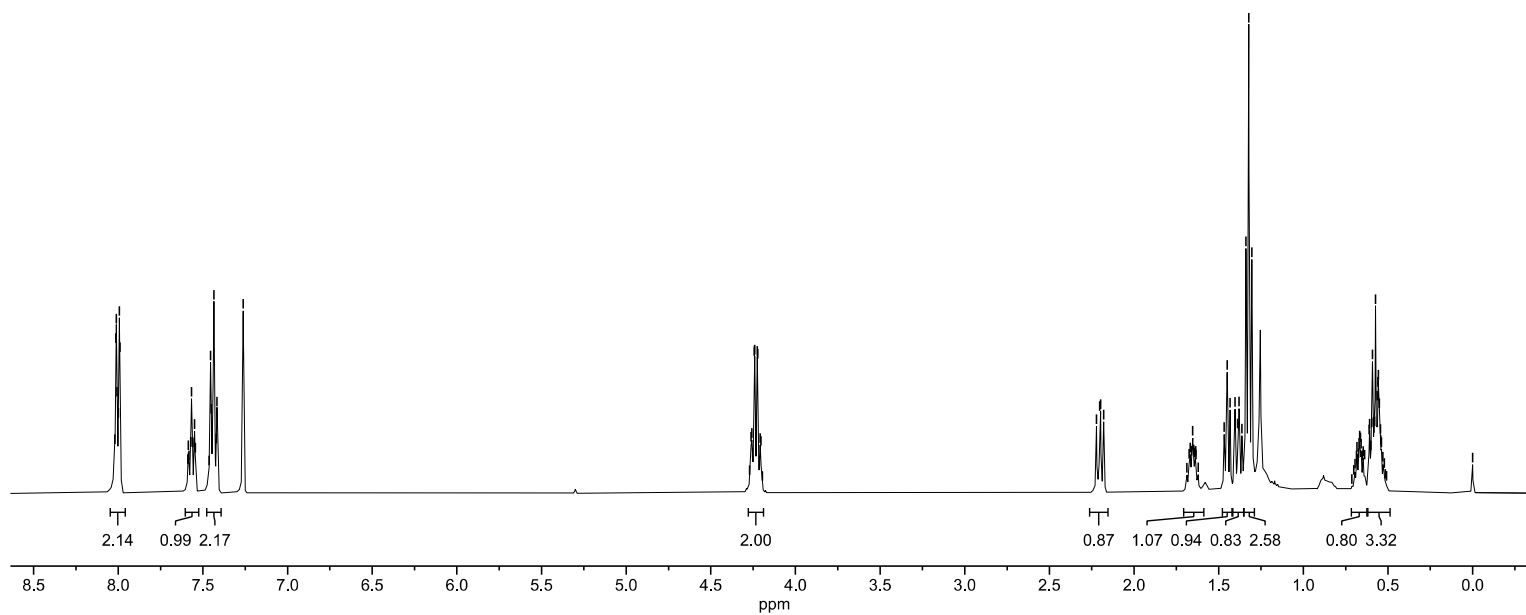

— 170.346  
— 167.000

133.876  
130.657  
130.986  
130.377  
129.106  
129.015

77.998 CDCl<sub>3</sub>  
77.744 CDCl<sub>3</sub>  
77.490 CDCl<sub>3</sub>

— 66.637  
— 61.528

— 29.307  
— 26.481  
17.889  
16.784  
15.086  
14.981  
14.845  
12.323  
7.183  
4.841  
4.408  
4.305

**5f.** (1R,2R)-2-(ethoxycarbonyl)-[1,1'-bi(cyclopropan)]-1-yl benzoate  
<sup>13</sup>C{<sup>1</sup>H} NMR (126 MHz, CDCl<sub>3</sub>)

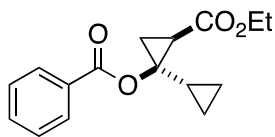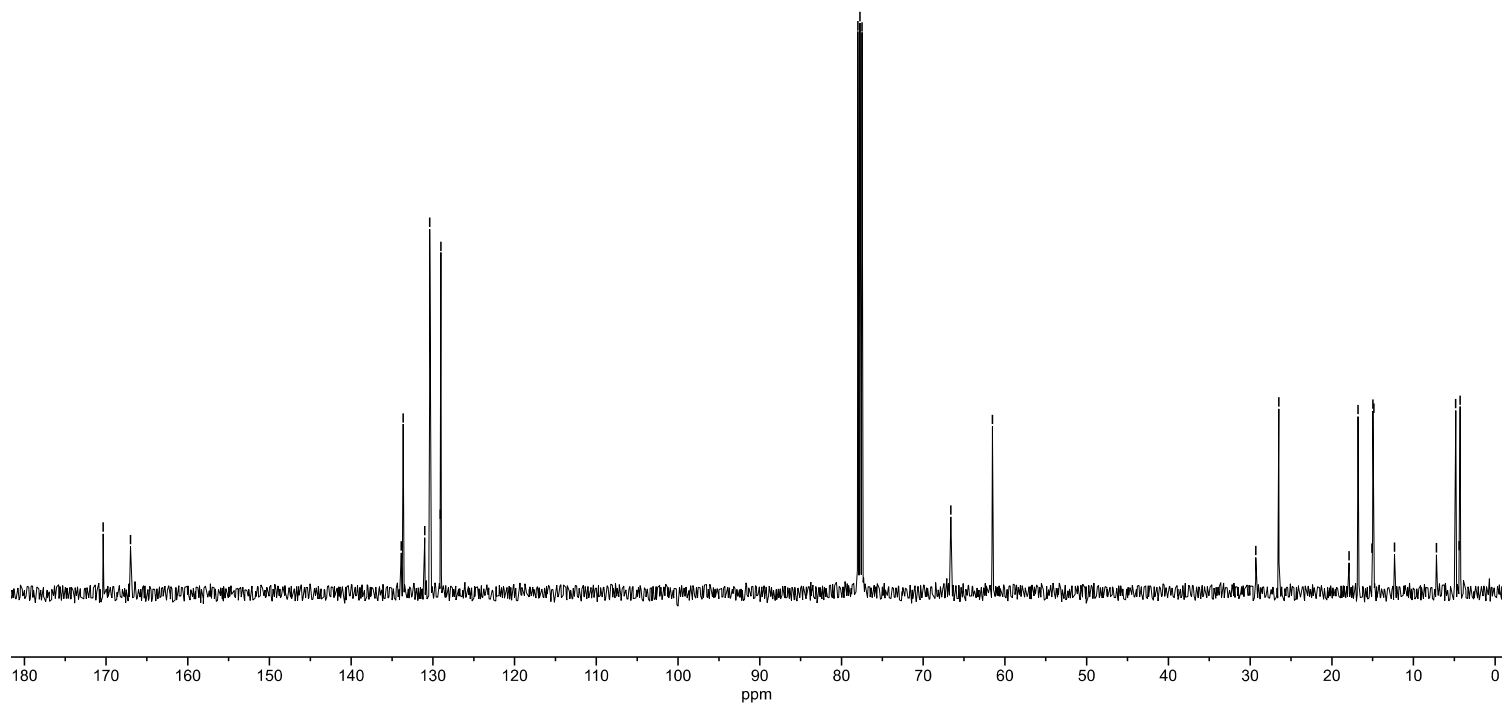

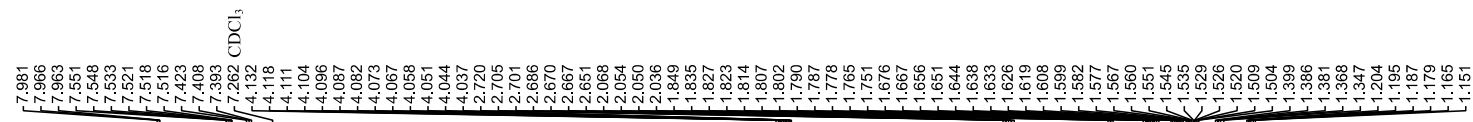

**5g.** (1R,2R)-1-cyclopentyl-2-(ethoxycarbonyl)cyclopropyl benzoate  
<sup>1</sup>H NMR (500 MHz, CDCl<sub>3</sub>)

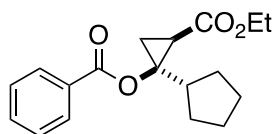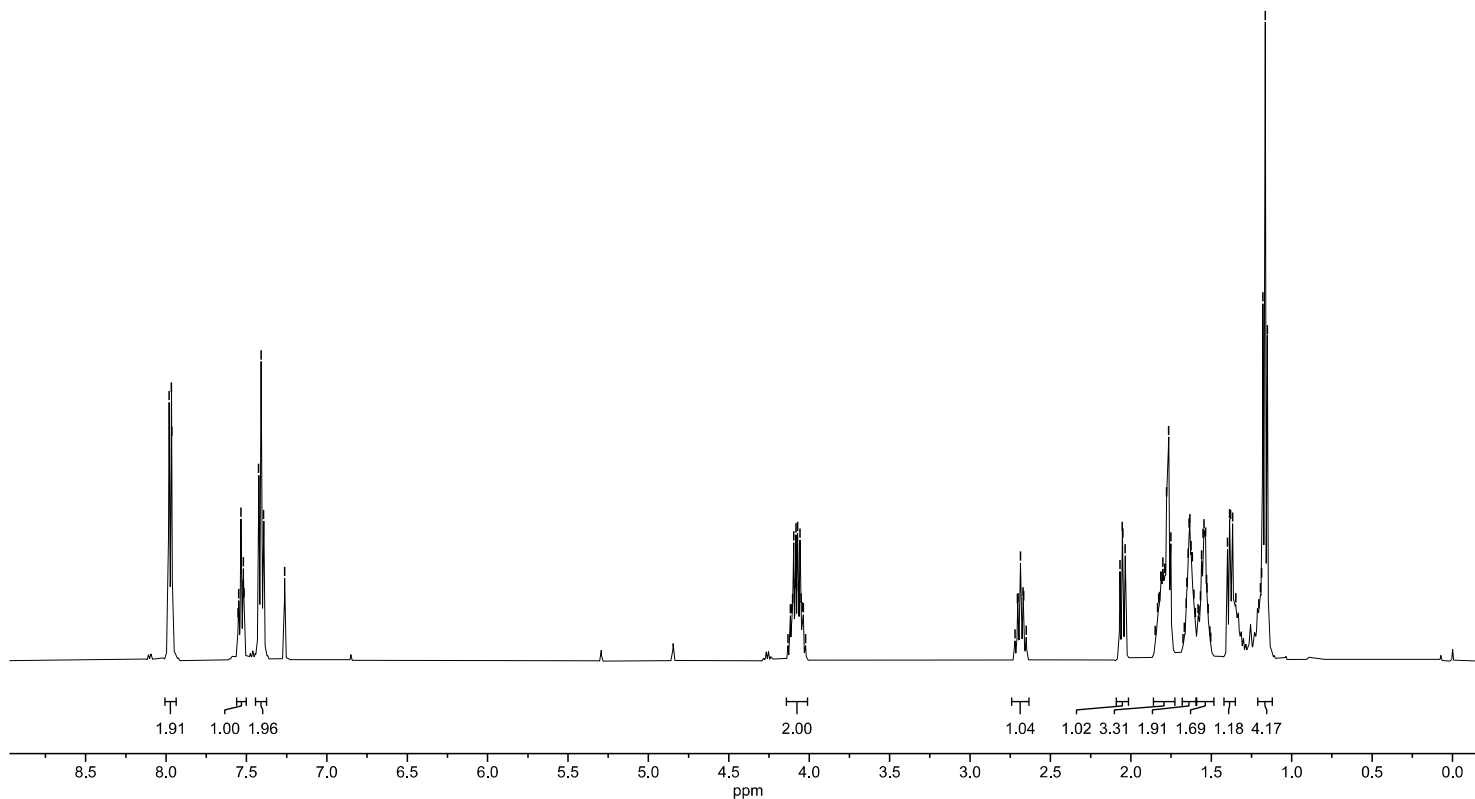

**5g.** (1R,2R)-1-cyclopentyl-2-(ethoxycarbonyl)cyclopropyl benzoate  
 $^{13}\text{C}\{^1\text{H}\}$  NMR (126 MHz,  $\text{CDCl}_3$ )

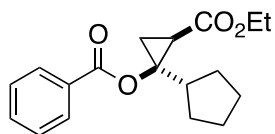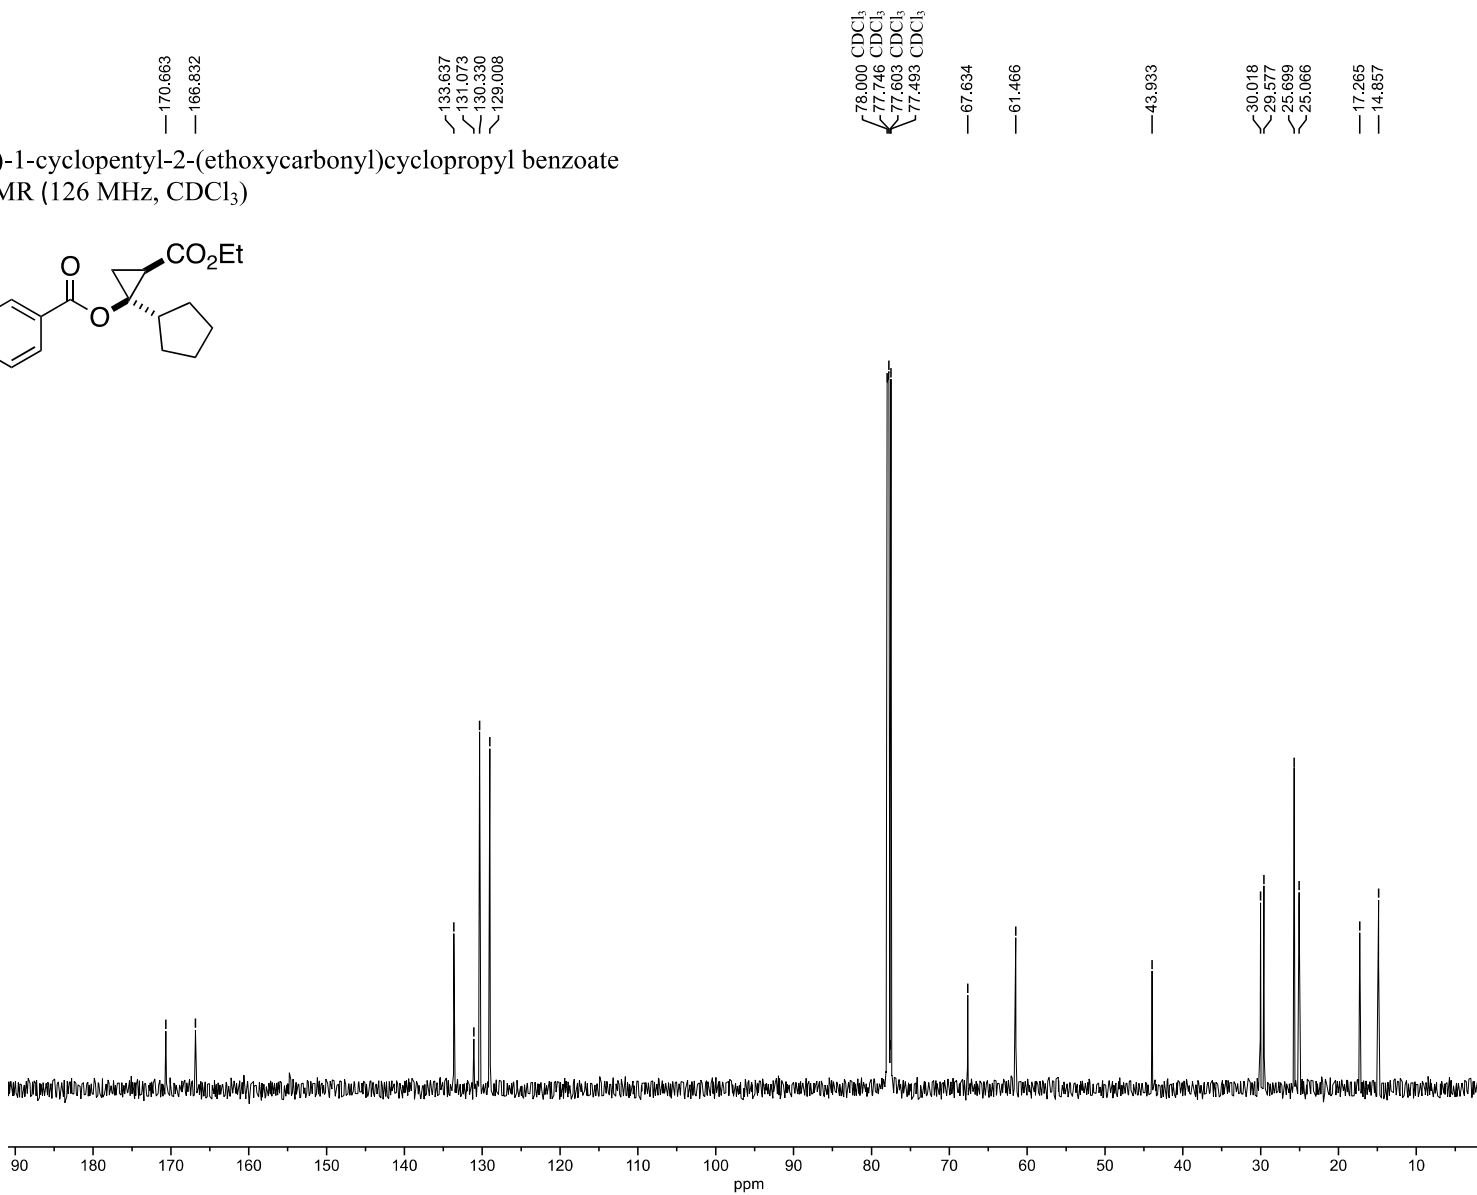

7.980  
7.965  
7.551  
7.537  
7.521  
7.428  
7.424  
7.423  
7.410  
7.396  
7.392  
7.260 CDCl<sub>3</sub>  
4.119  
4.114  
4.106  
4.098  
4.093  
4.084  
4.079  
4.071  
4.067  
4.057  
4.052  
4.044  
4.036  
4.031  
4.020  
2.056  
2.052  
2.042  
2.038  
2.024  
2.019  
1.912  
1.882  
1.855  
1.848  
1.843  
1.825  
1.819  
1.776  
1.771  
1.762  
1.757  
1.748  
1.743  
1.736  
1.663  
1.636  
1.553  
1.407  
1.402  
1.394  
1.389  
1.384  
1.375  
1.371  
1.255  
1.234  
1.227  
1.208  
1.201  
1.178  
1.173  
1.163  
1.158  
1.149  
1.144  
1.132  
1.107  
1.101  
1.081  
1.075  
1.050  
1.020  
0.994  
0.968  
0.000 TMS

**5h.** (1R,2R)-1-cyclohexyl-2-(ethoxycarbonyl)cyclopropyl benzoate  
<sup>1</sup>H NMR (500 MHz, CDCl<sub>3</sub>)

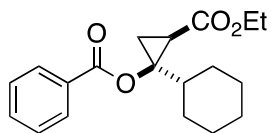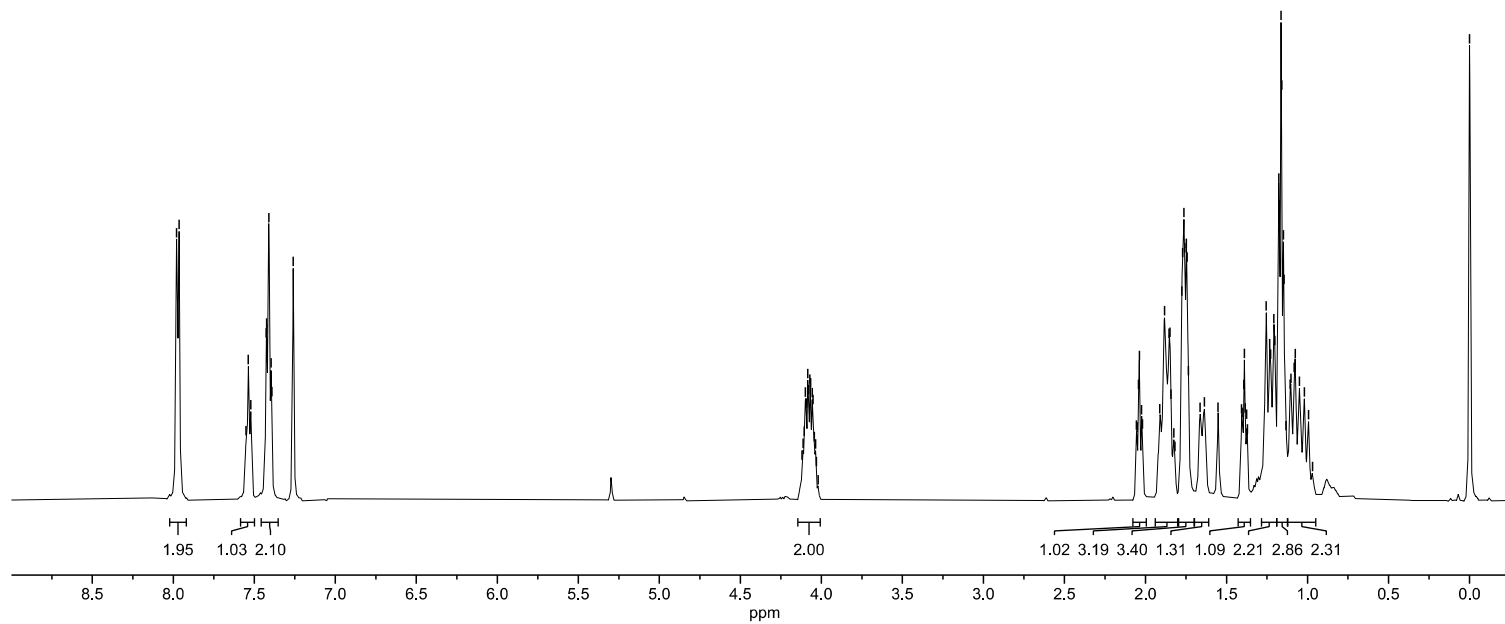



—170.663  
—166.794

—133.667  
—131.019  
—130.354  
—129.029

78.014 CDCl<sub>3</sub>  
77.760 CDCl<sub>3</sub>  
77.506 CDCl<sub>3</sub>

—68.752

—61.453

—54.151

—42.853

29.952

29.712

26.823

26.773

26.730

24.541

—17.568

—14.861

**5h.** (1R,2R)-1-cyclohexyl-2-(ethoxycarbonyl)cyclopropyl benzoate  
<sup>13</sup>C{<sup>1</sup>H} NMR (126 MHz, CDCl<sub>3</sub>)

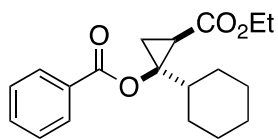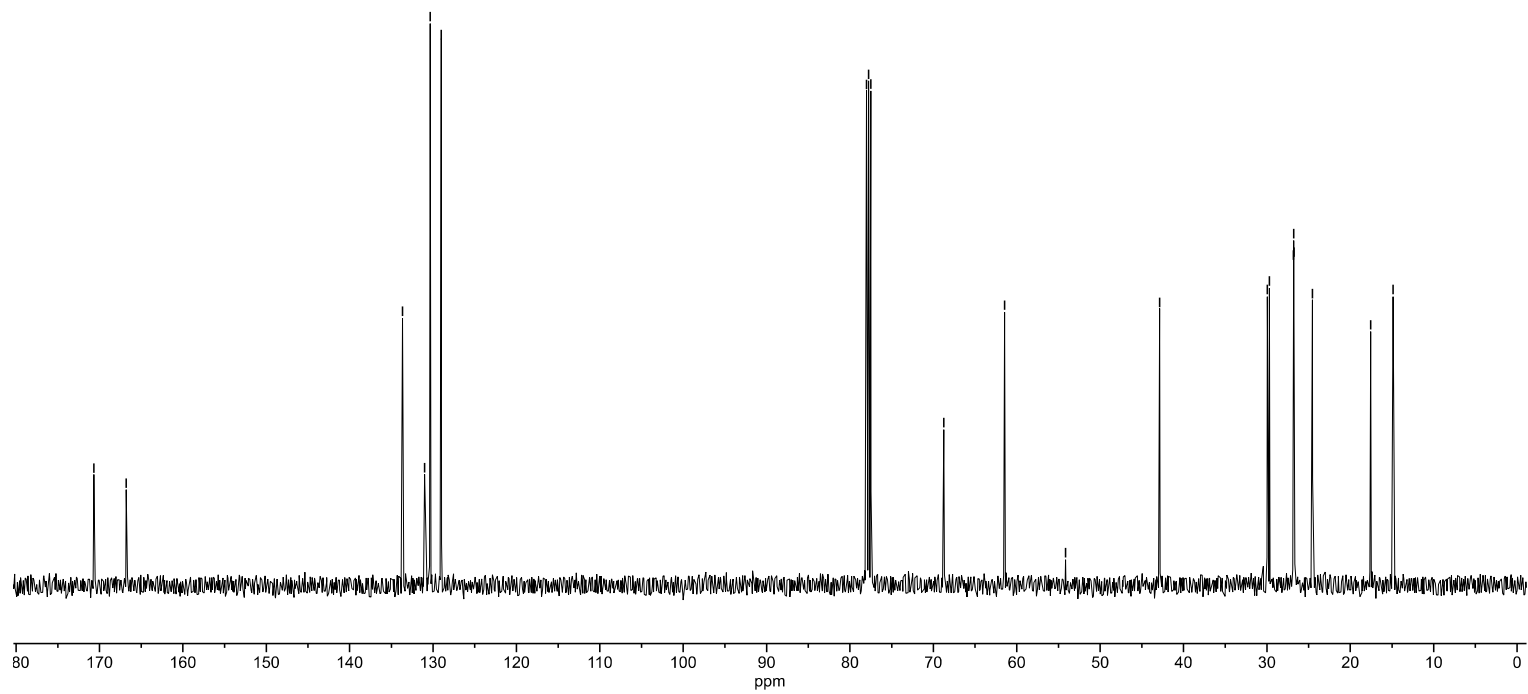

8.024  
8.021  
8.019  
8.007  
8.004  
7.998  
7.995  
7.982  
7.979  
7.615  
7.611  
7.601  
7.598  
7.595  
7.553  
7.552  
7.544  
7.537  
7.449  
7.446  
7.442  
7.438  
7.435  
7.432  
7.430  
7.426  
7.423  
7.411  
7.407  
7.395  
7.355  
7.353  
7.339  
7.335  
7.332  
7.326  
7.323  
7.318  
7.314  
7.306  
7.303  
7.295  
7.292  
7.290  
7.287  
7.278  
7.273  
5.300 CH<sub>2</sub>Cl<sub>2</sub>  
4.184  
4.170  
4.162  
4.148  
3.936  
3.934  
3.922  
3.920  
2.576  
2.572  
2.557  
2.497  
2.482  
2.479  
2.464  
2.336  
2.322  
2.307  
2.196  
2.183  
2.181  
2.168  
1.846  
1.833  
1.828  
1.815  
1.779  
1.765  
1.760  
1.246  
1.231  
1.217  
1.015  
1.001  
0.987

**5i.** 2-(ethoxycarbonyl)-1-phenylcyclopropyl benzoate  
<sup>1</sup>H NMR (500 MHz, CDCl<sub>3</sub>)

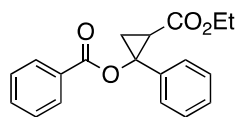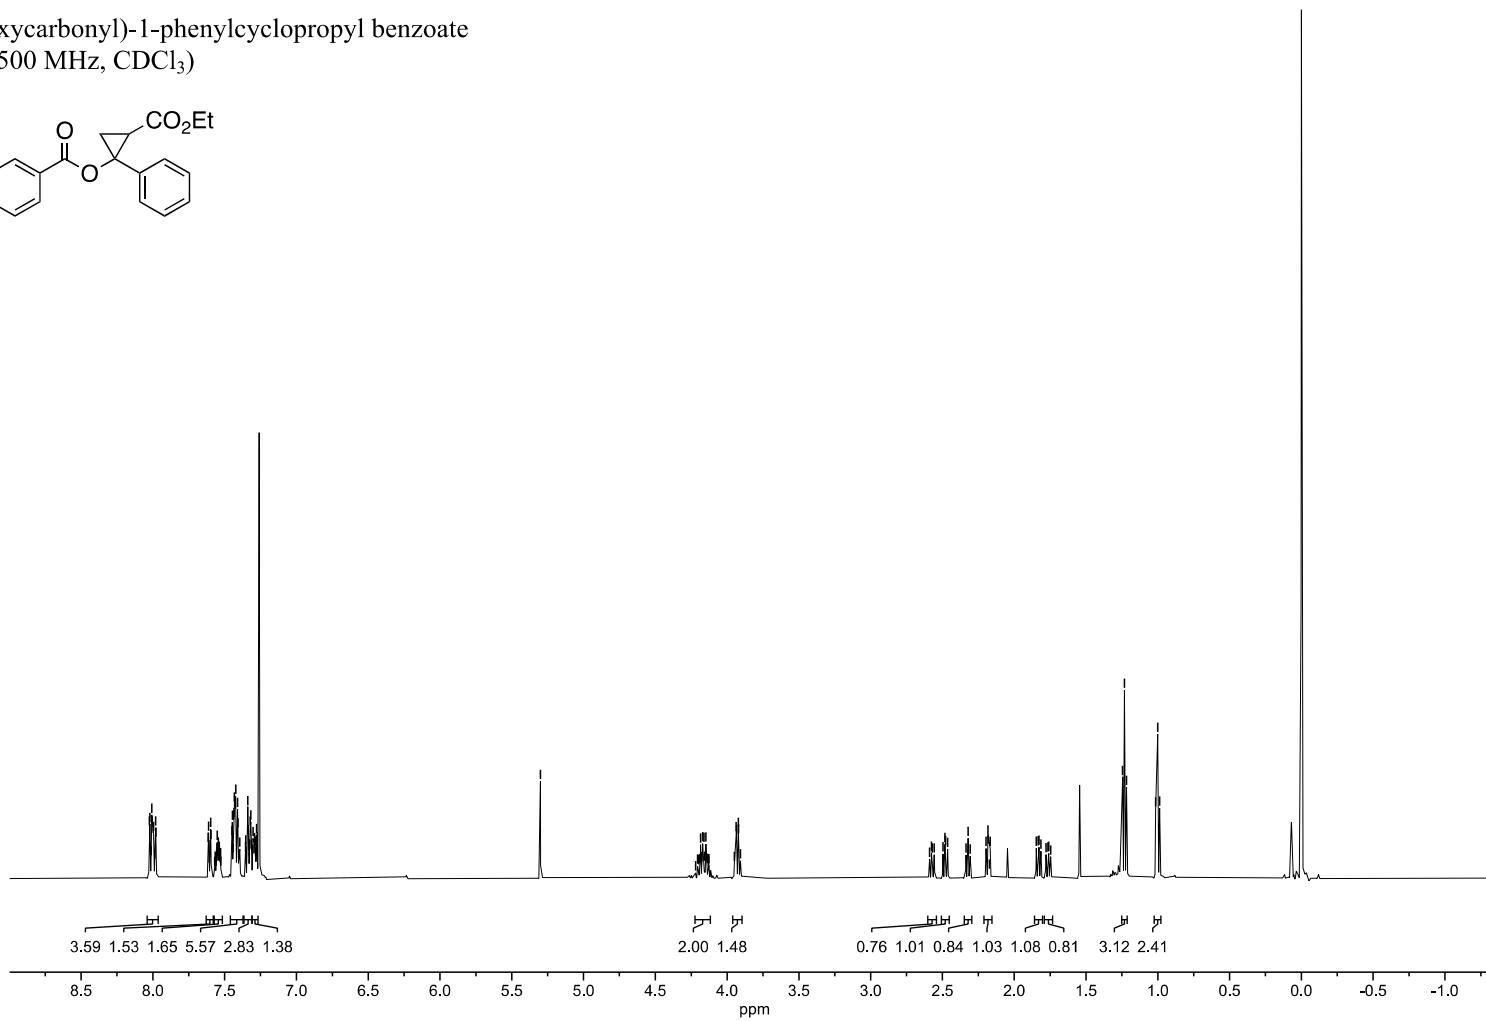

5j. Ethyl (1R,2S)-2-acetoxy-2-phenylcyclopropane-1-carboxylate  
<sup>1</sup>H NMR (500 MHz, CDCl<sub>3</sub>)

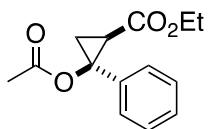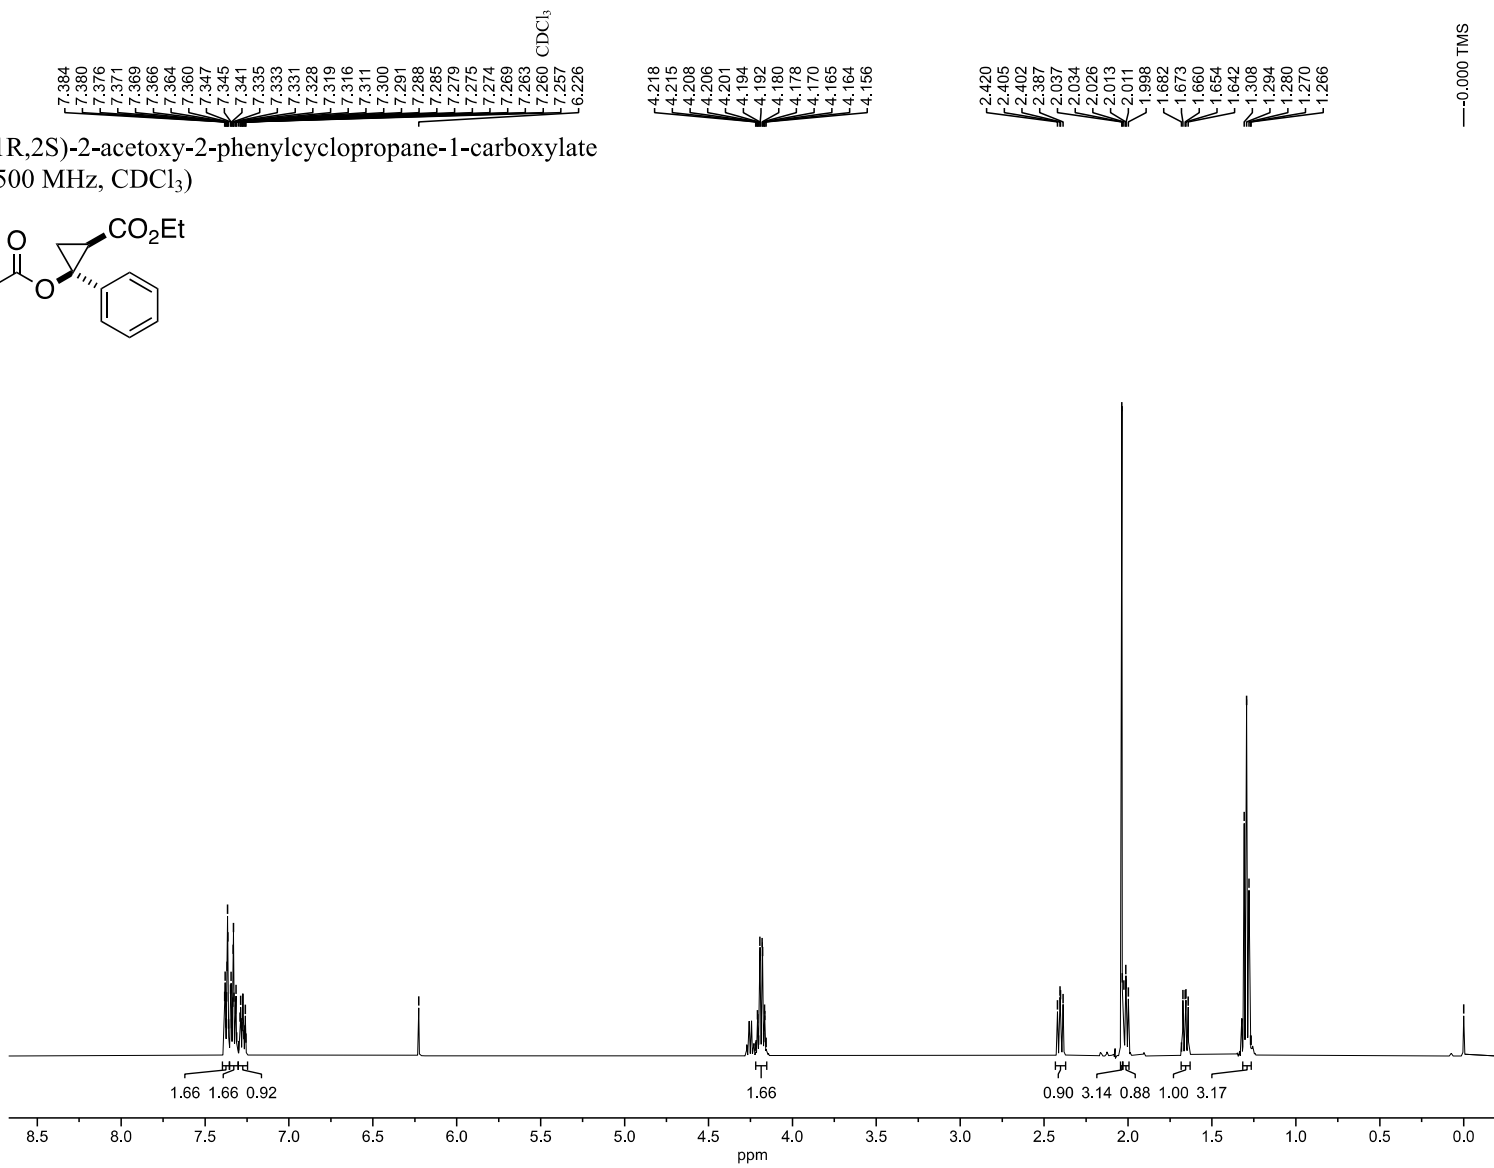

**5j.** Ethyl (1R,2S)-2-acetoxy-2-phenylcyclopropane-1-carboxylate  
 $^{13}\text{C}\{^1\text{H}\}$  NMR (126 MHz,  $\text{CDCl}_3$ )

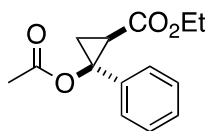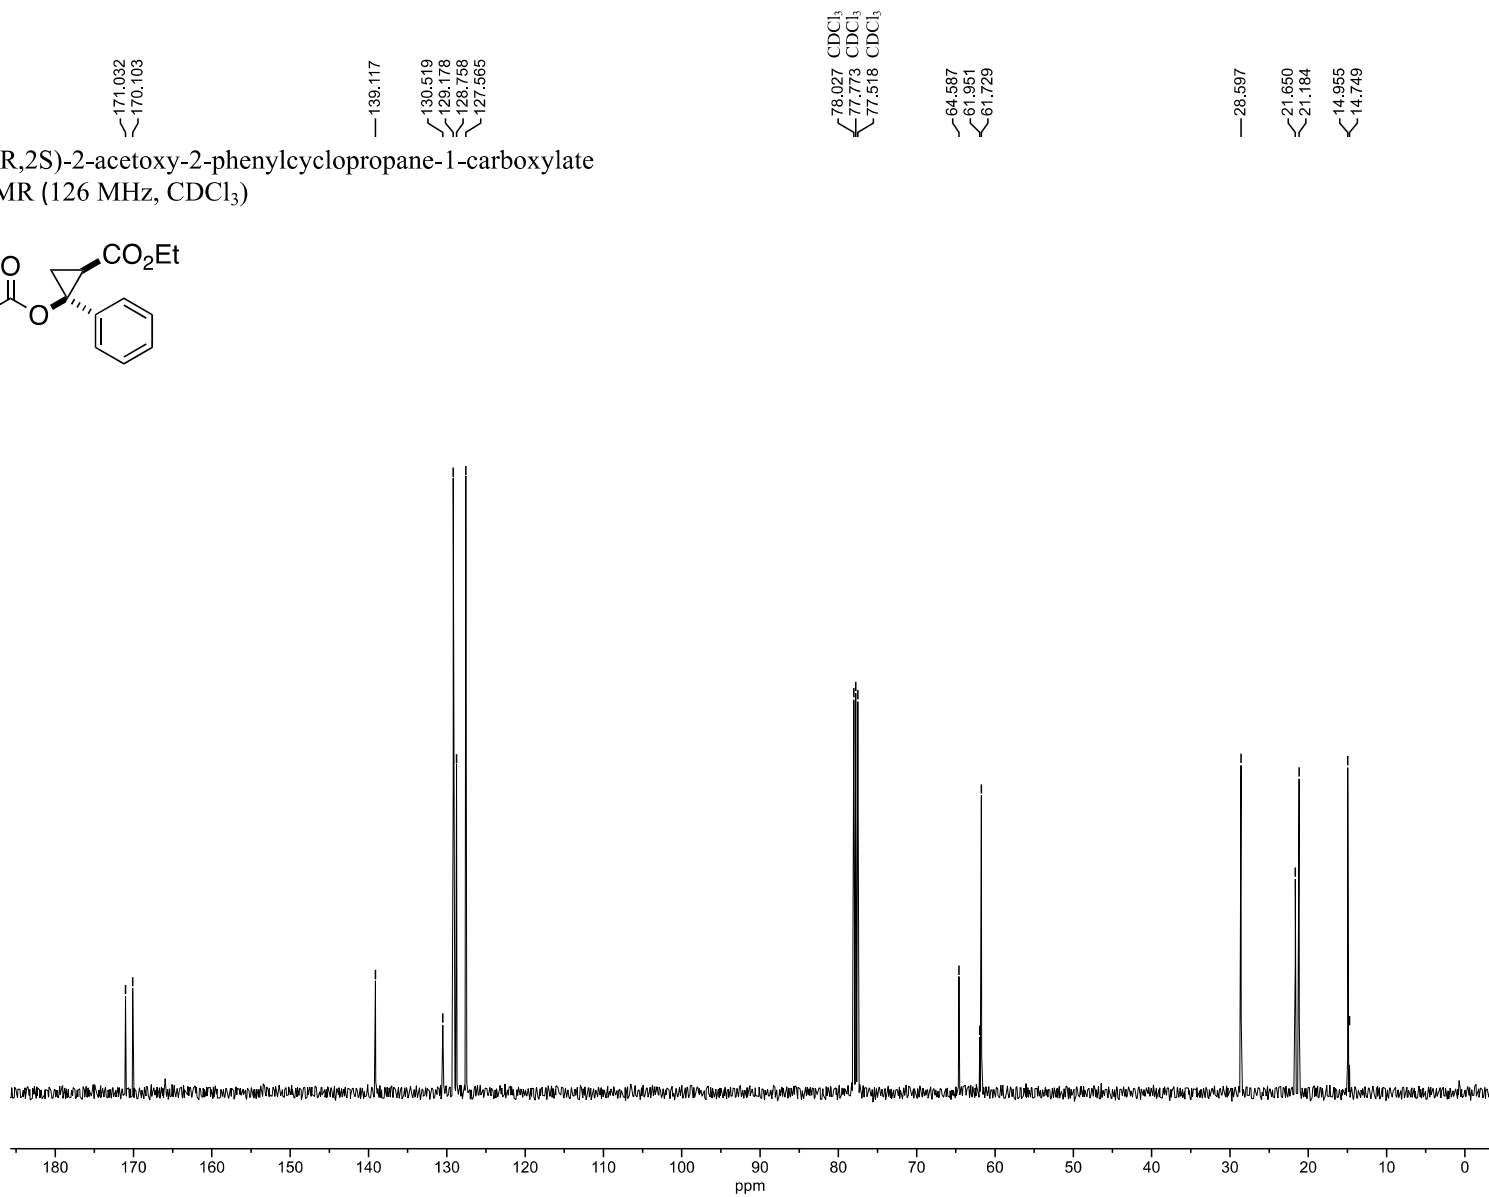

**5k.** Ethyl 2-acetoxy-2-(*o*-tolyl)cyclopropane-1-carboxylate

<sup>1</sup>H NMR (500 MHz, CDCl<sub>3</sub>)

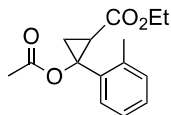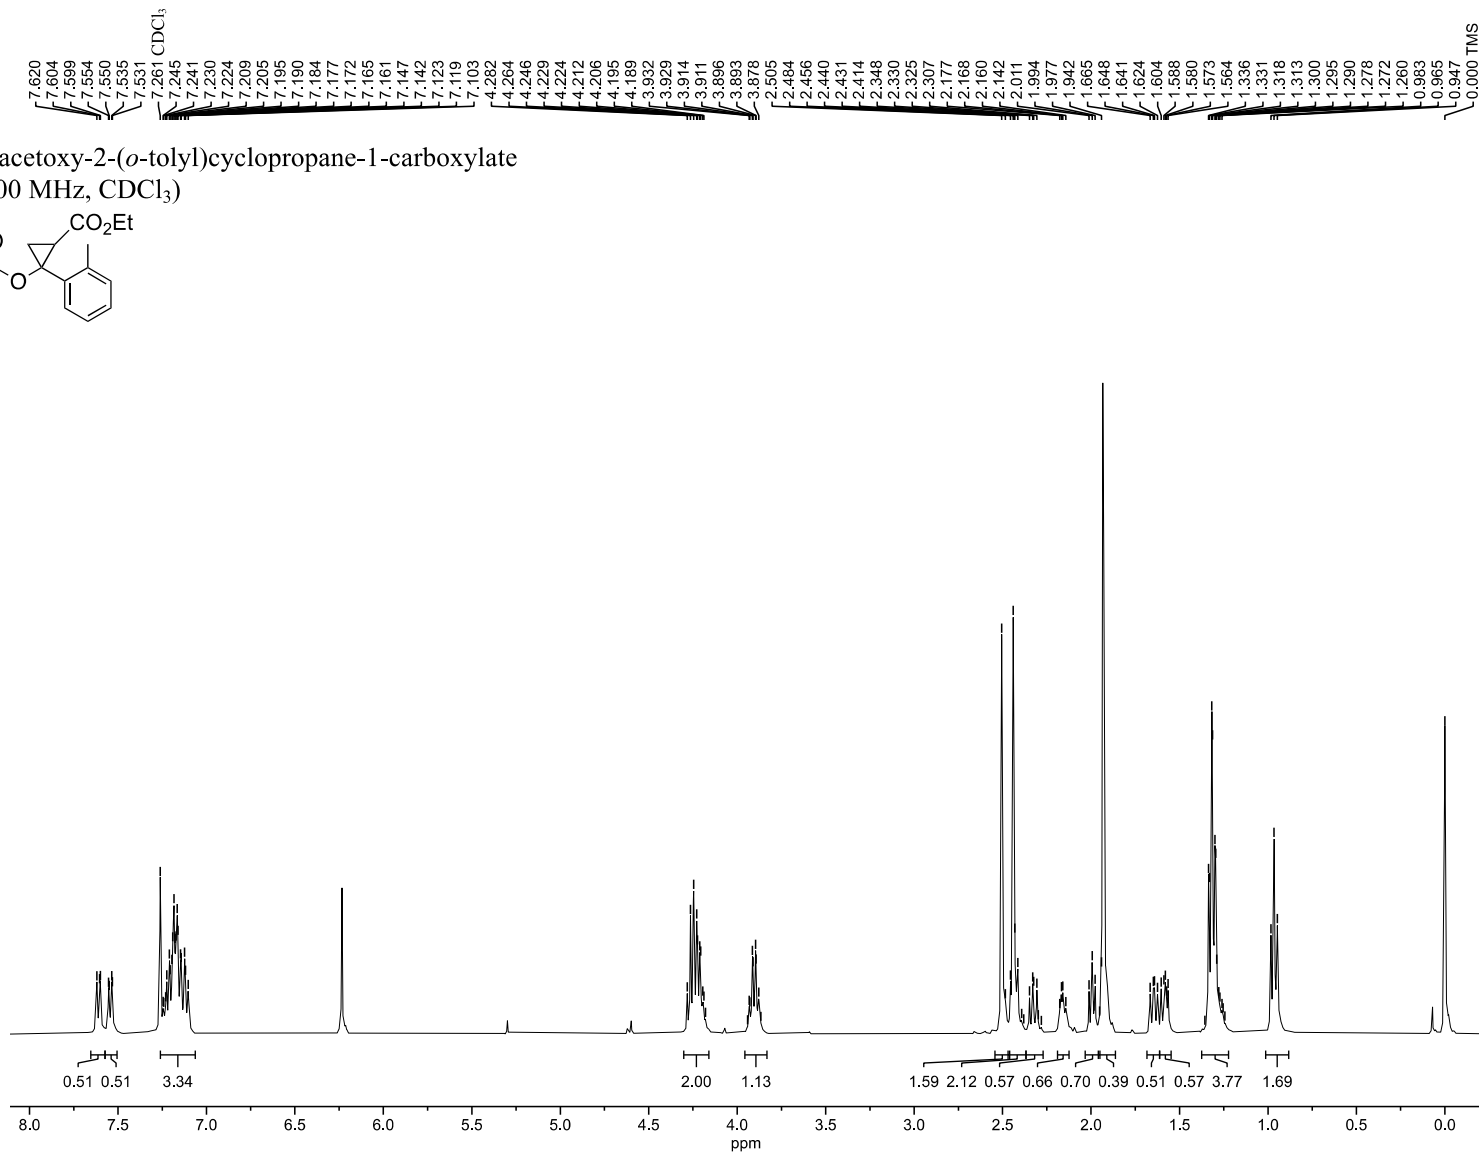

**5m.** Ethyl (1R,2S)-2-acetoxy-2-(p-tolyl)cyclopropane-1-carboxylate  
<sup>1</sup>H NMR (500 MHz, CDCl<sub>3</sub>)

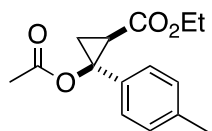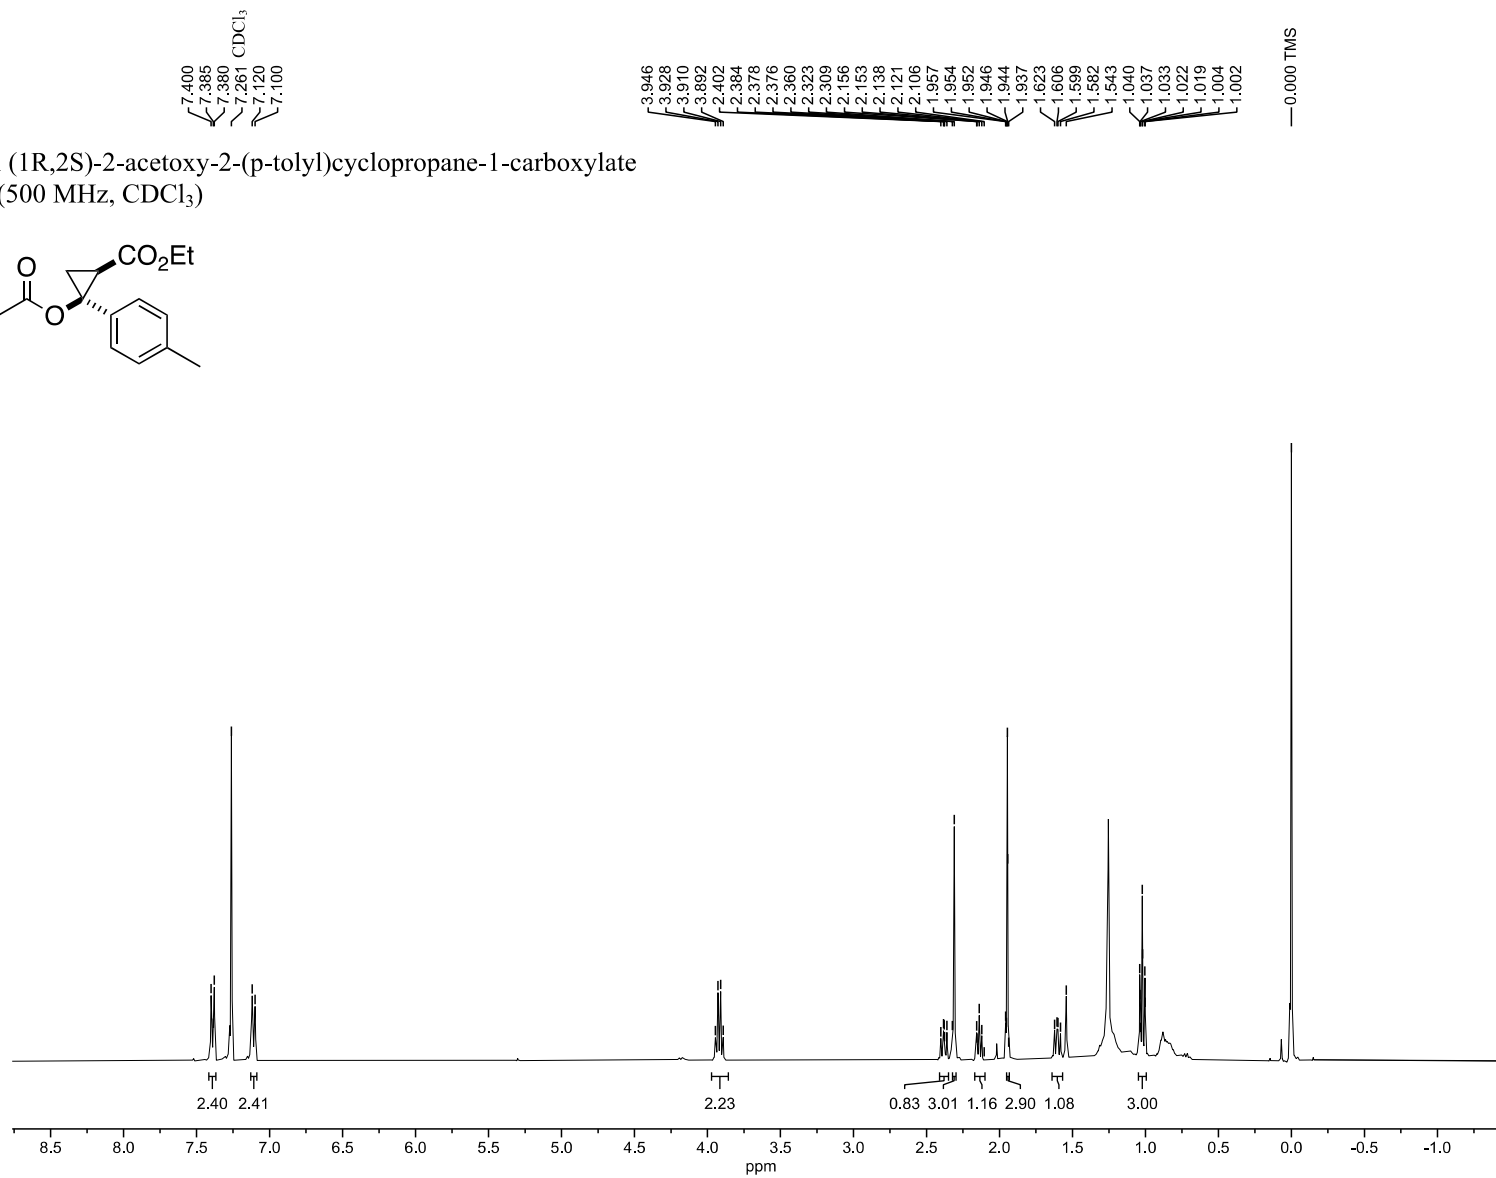

**5m.** Ethyl (1R,2S)-2-acetoxy-2-(p-tolyl)cyclopropane-1-carboxylate  
 $^{13}\text{C}\{^1\text{H}\}$  NMR (126 MHz,  $\text{CDCl}_3$ )

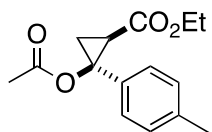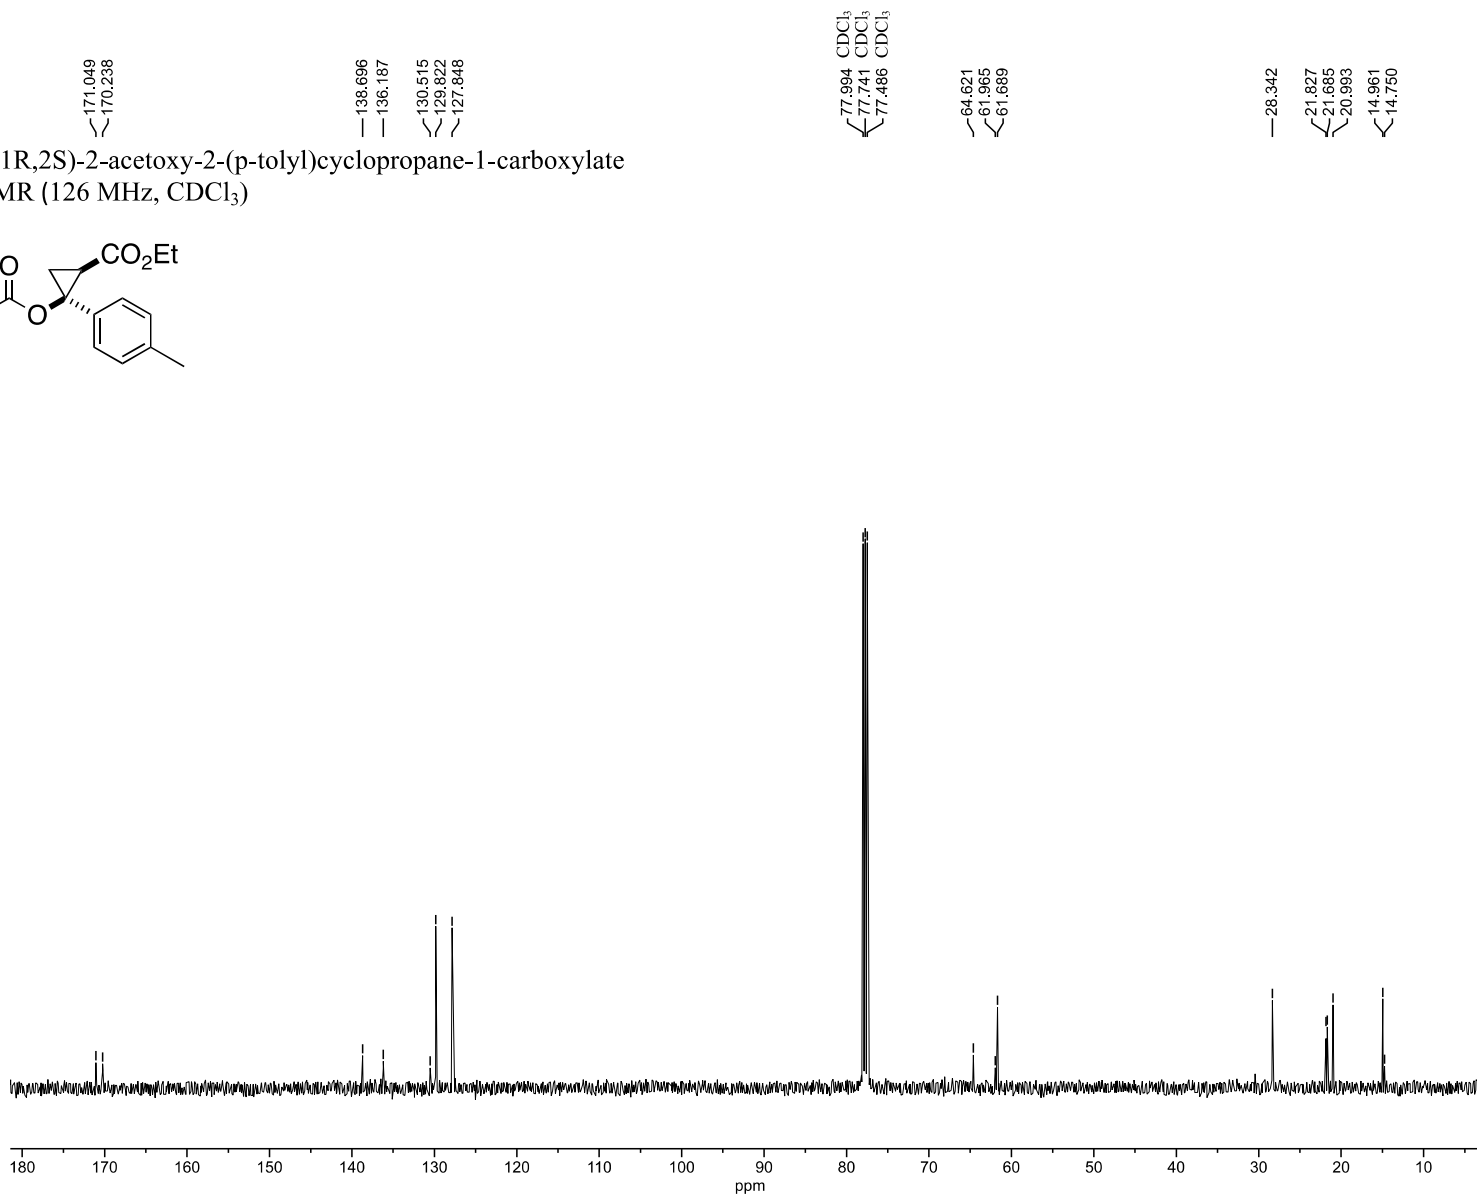

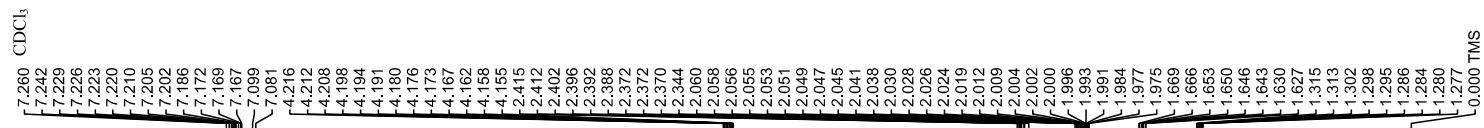

**51.** Ethyl (1R,2S)-2-acetoxy-2-(m-tolyl)cyclopropane-1-carboxylate  
<sup>1</sup>H NMR (500 MHz, CDCl<sub>3</sub>)

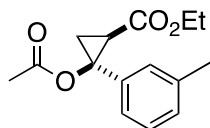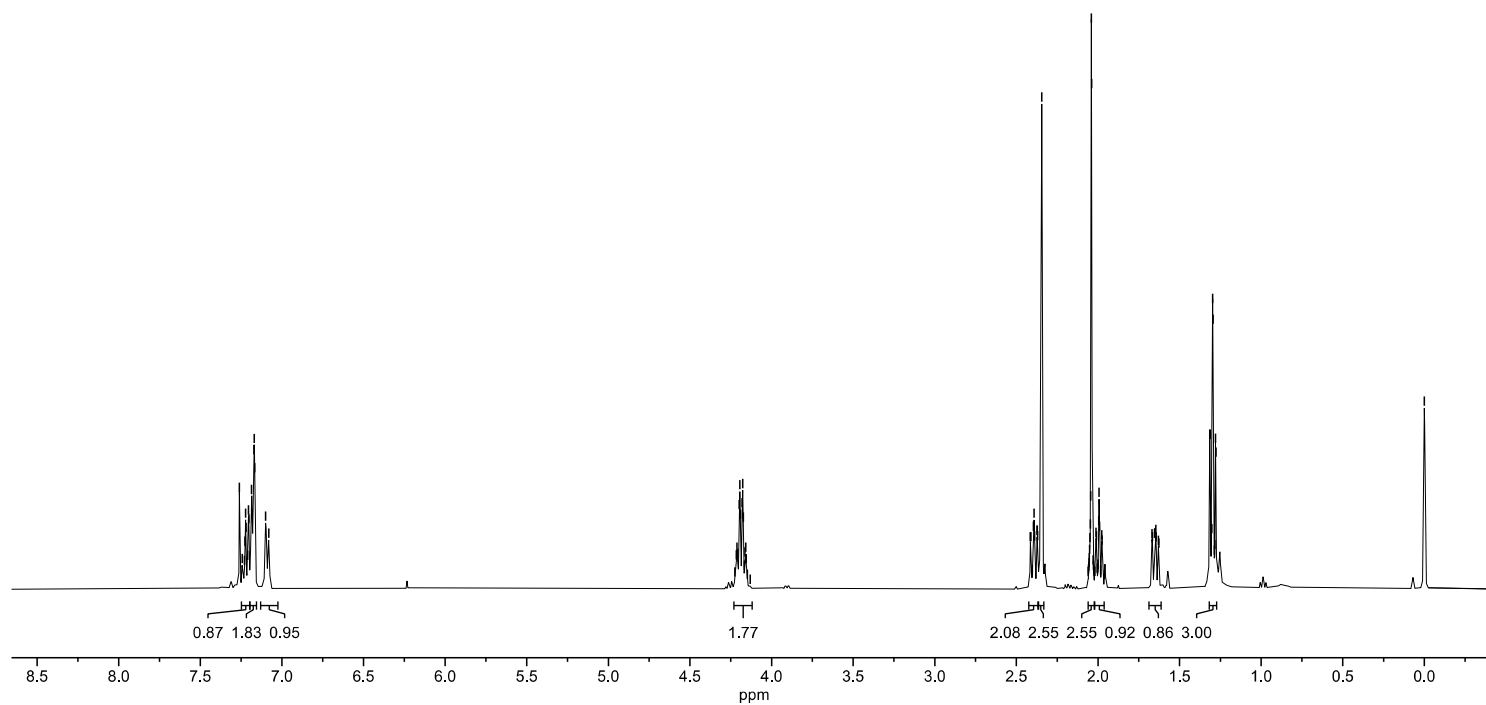



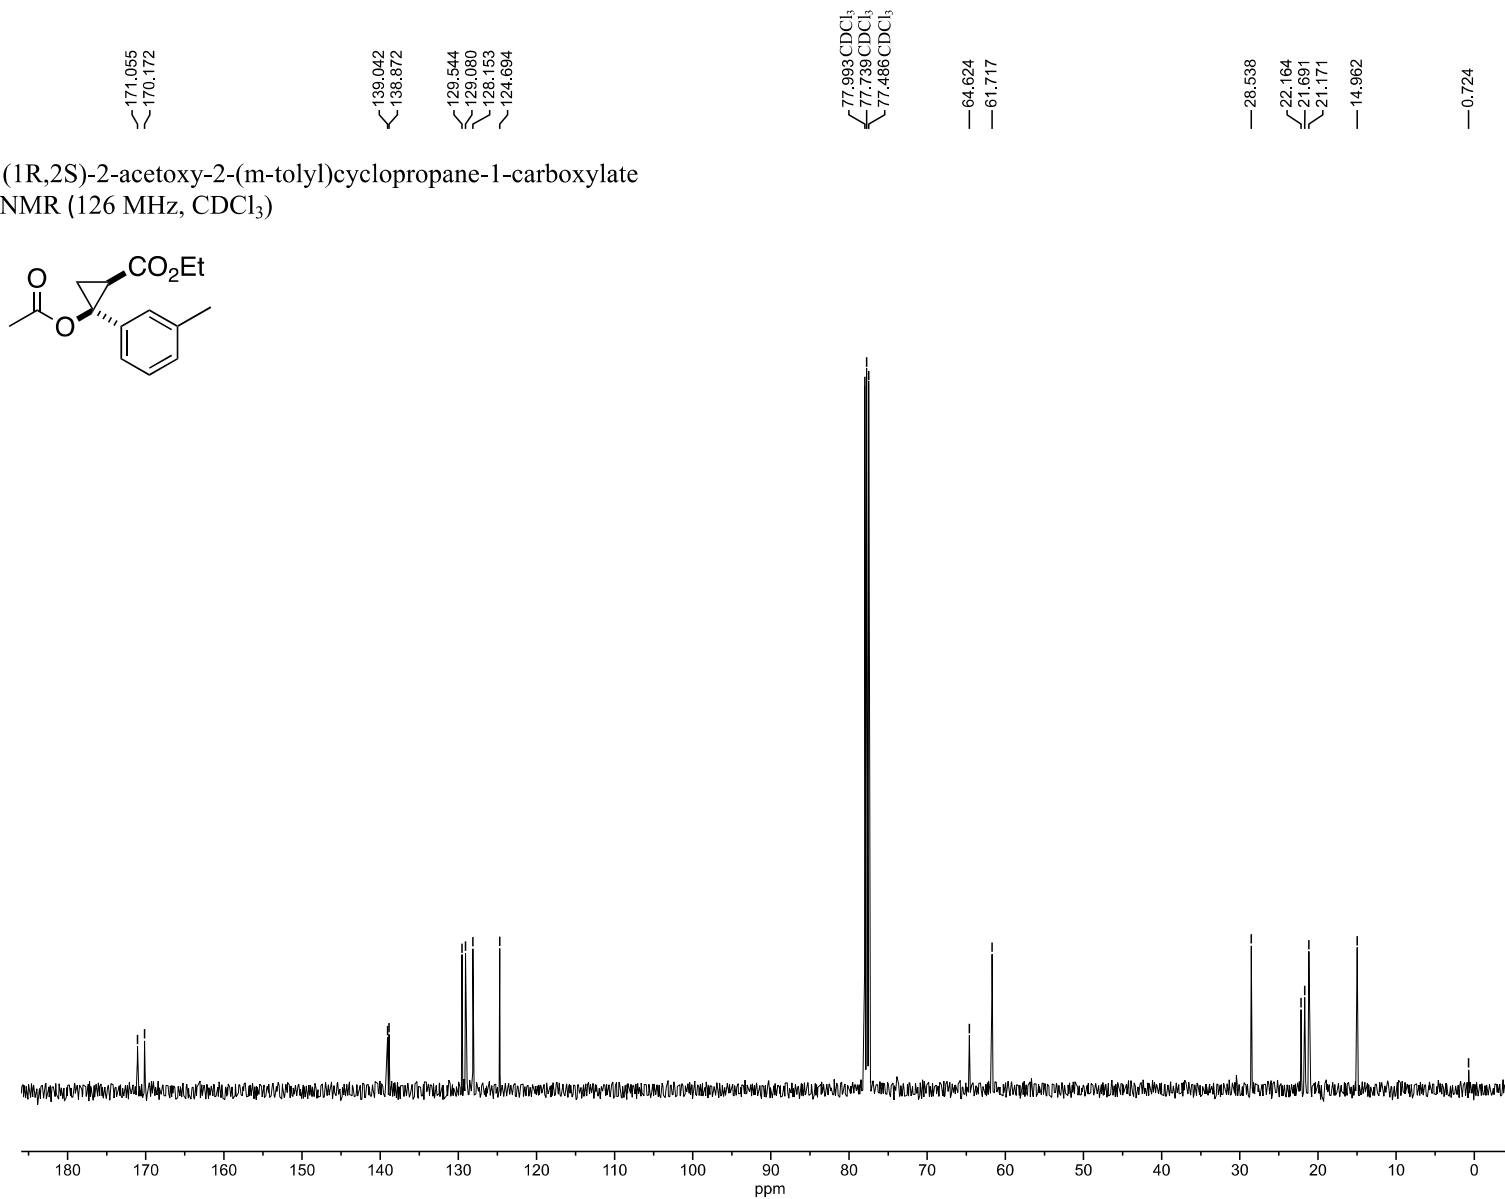

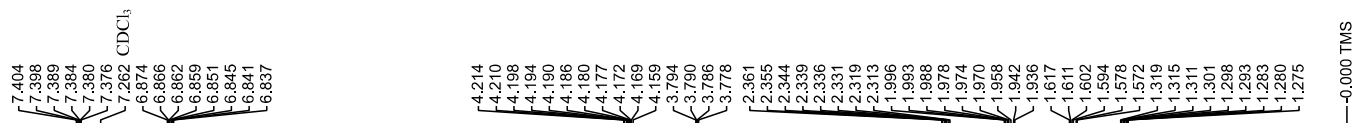

**5q.** Ethyl (1R,2S)-2-acetoxy-2-(4-methoxyphenyl)cyclopropane-1-carboxylate  
<sup>1</sup>H NMR (500 MHz, CDCl<sub>3</sub>)

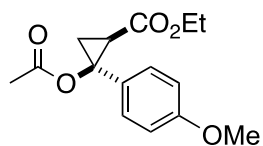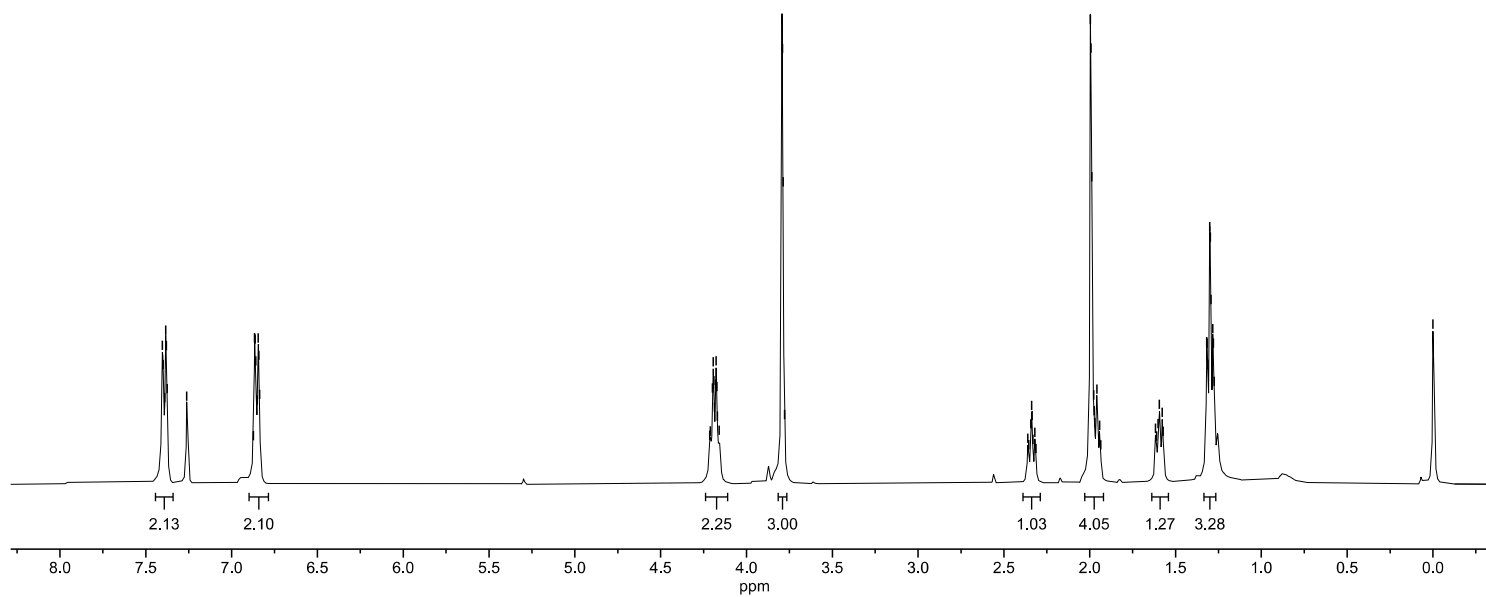

**5q.** Ethyl (1R,2S)-2-acetoxy-2-(4-methoxyphenyl)cyclopropane-1-carboxylate  
 $^{13}\text{C}\{^1\text{H}\}$  NMR (126 MHz,  $\text{CDCl}_3$ )

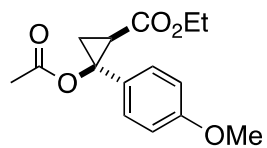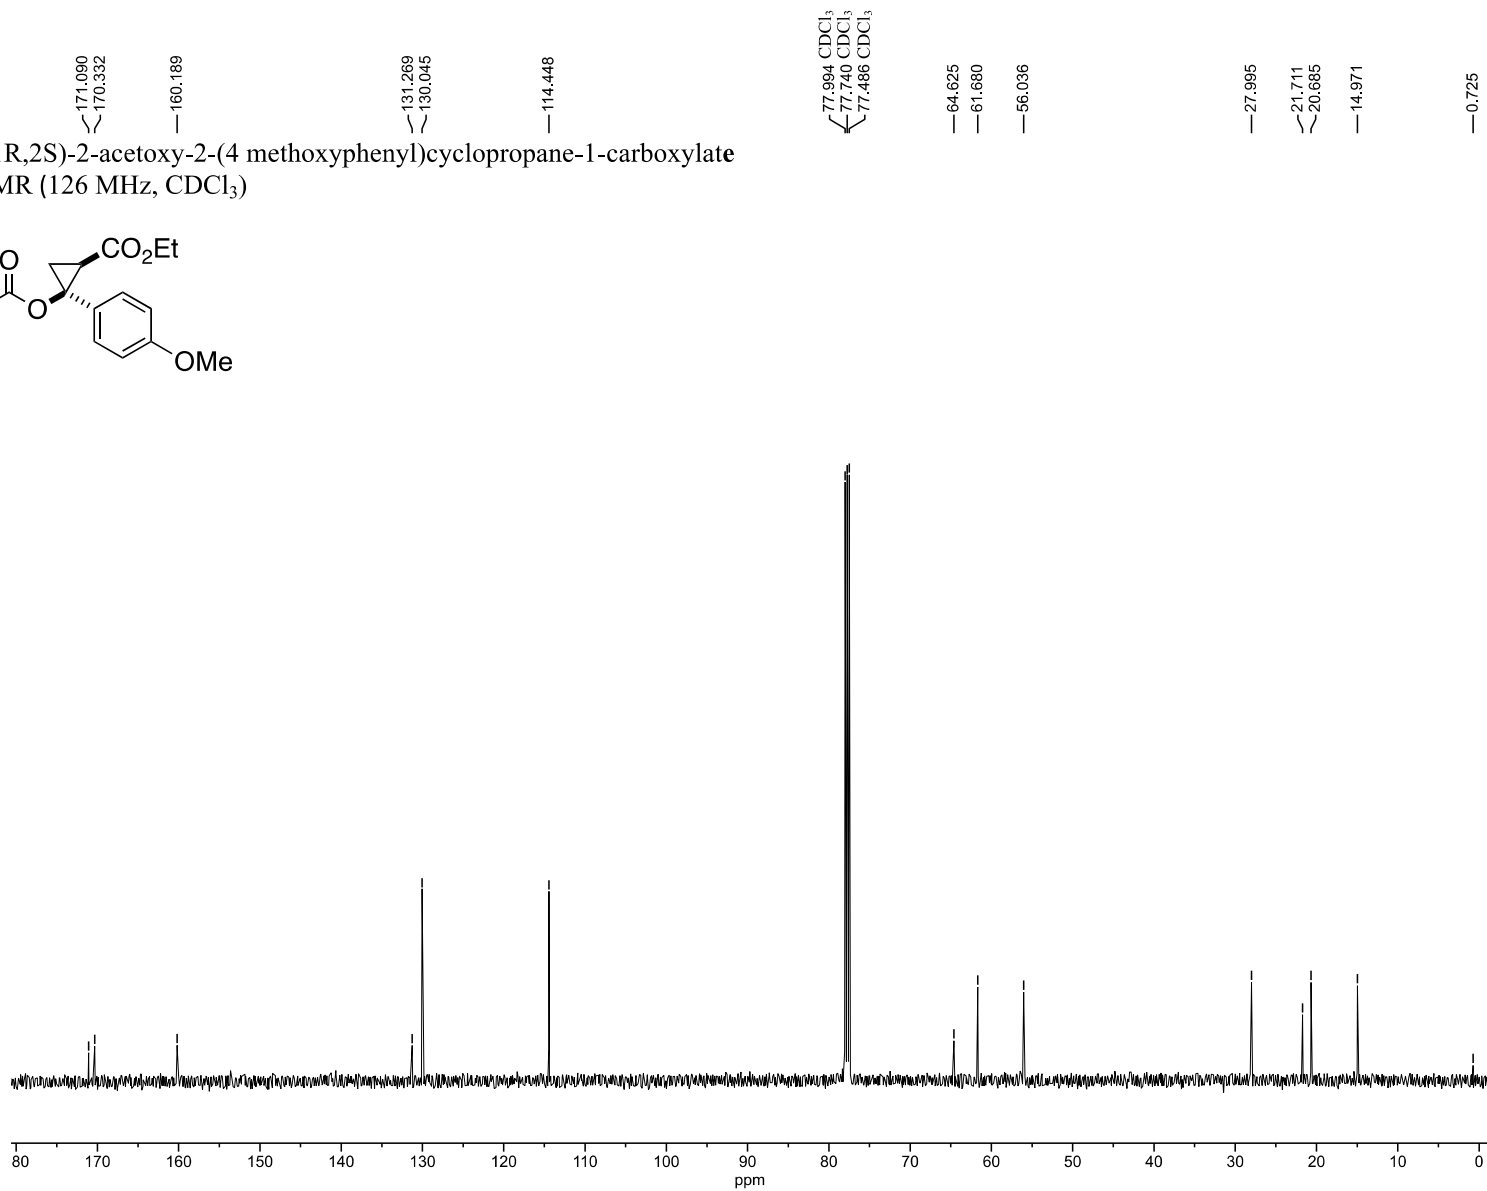

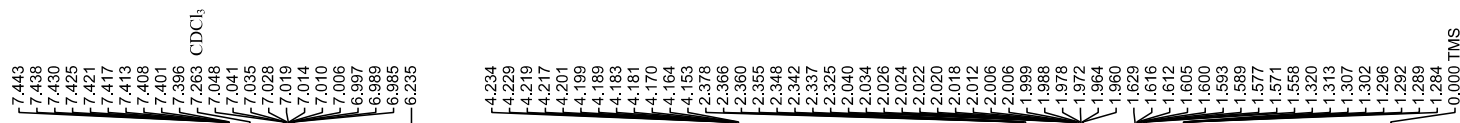

**5n.** Ethyl (1R,2S)-2-acetoxy-2-(4-fluorophenyl)cyclopropane-1-carboxylate  
<sup>1</sup>H NMR (500 MHz, CDCl<sub>3</sub>)

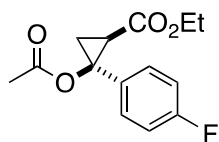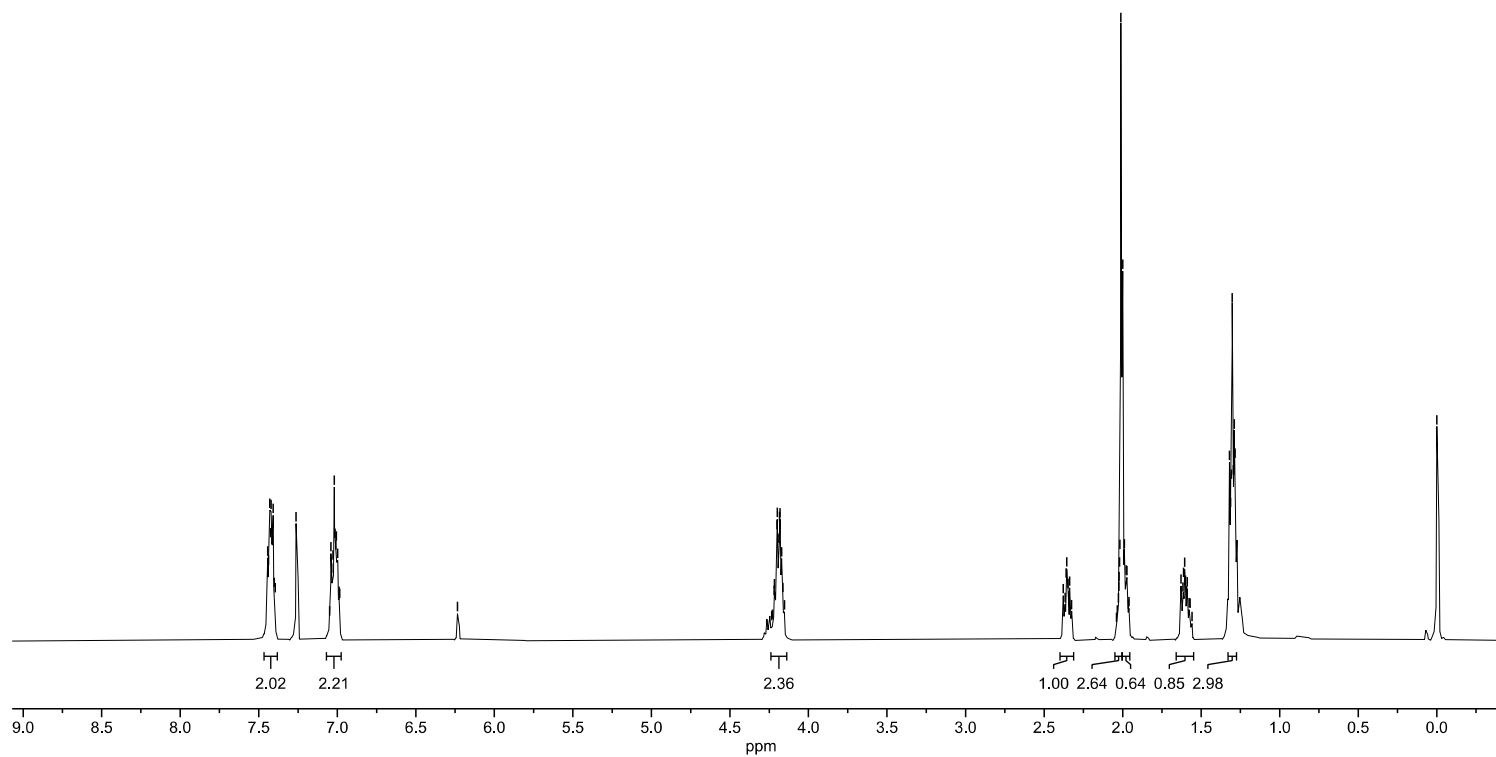

**5n.** Ethyl (1R,2S)-2-acetoxy-2-(4-fluorophenyl)cyclopropane-1-carboxylate  
 $^{13}\text{C}\{^1\text{H}\}$  NMR (126 MHz,  $\text{CDCl}_3$ )

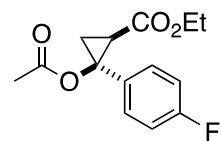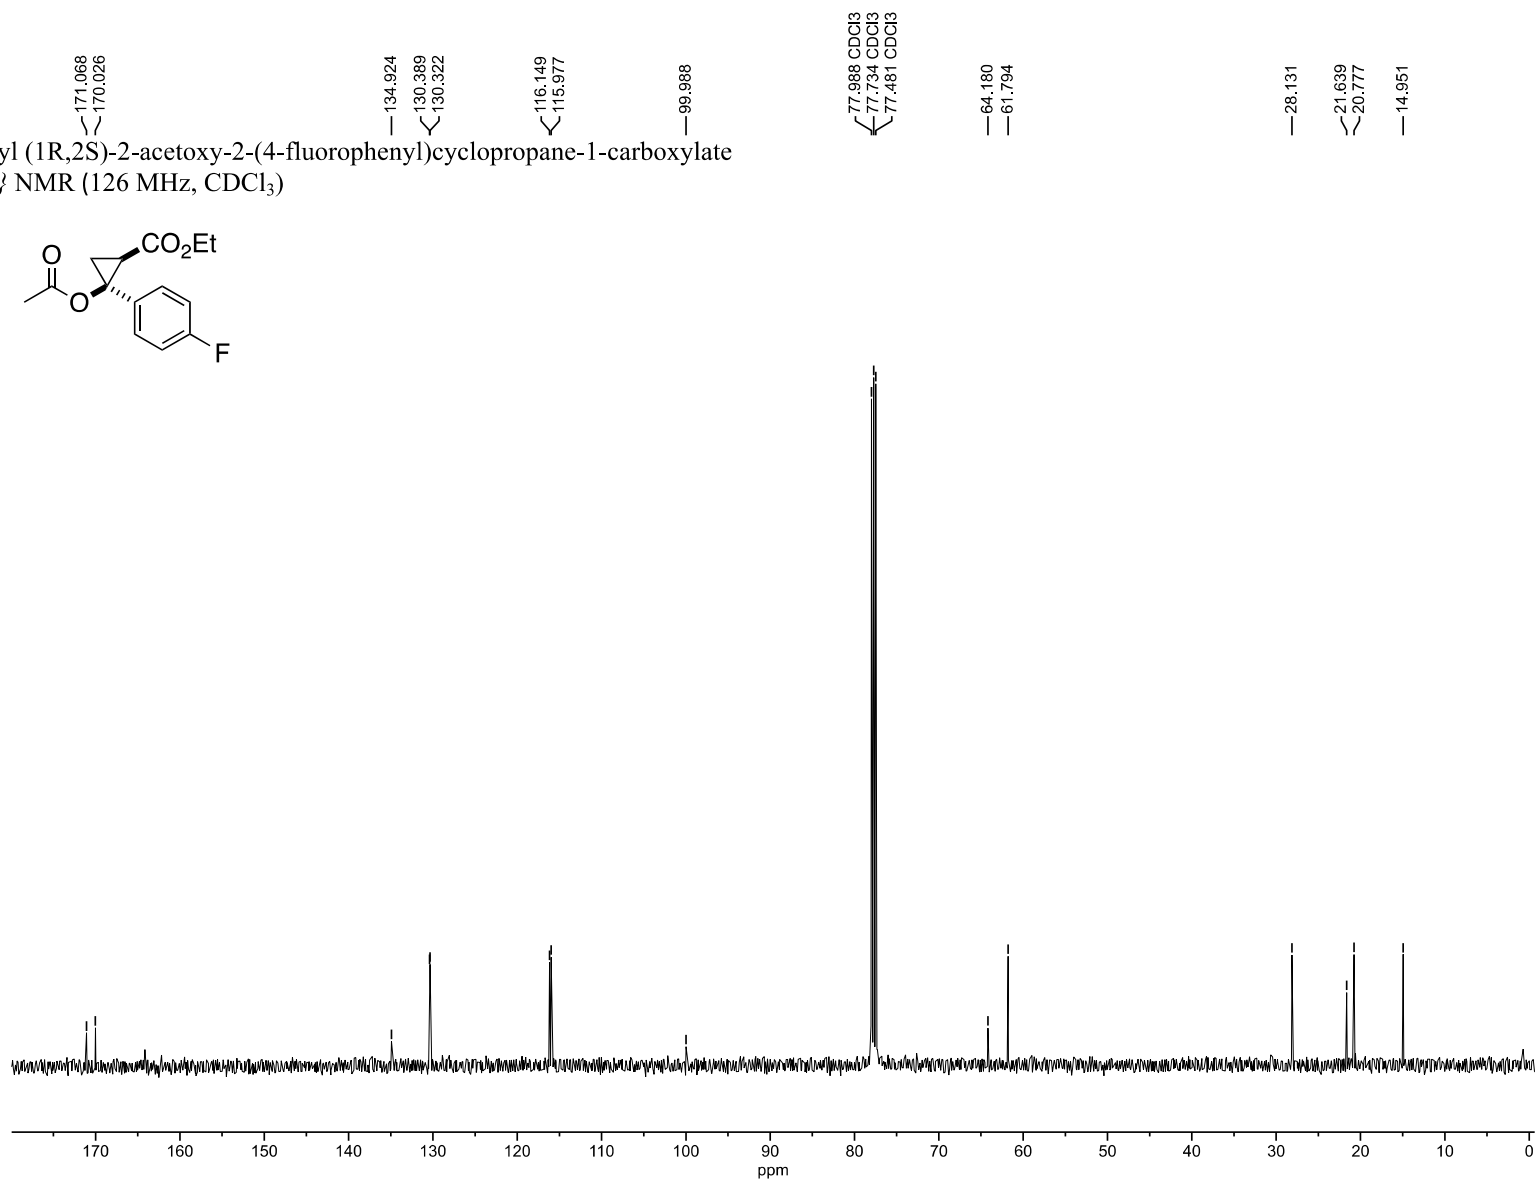

**5n.** Ethyl (1R,2S)-2-acetoxy-2-(4-fluorophenyl)cyclopropane-1-carboxylate  
<sup>19</sup>F NMR 376 MHz

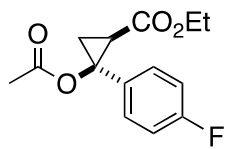

-113.589  
-113.584  
-113.604  
-113.610  
-113.617

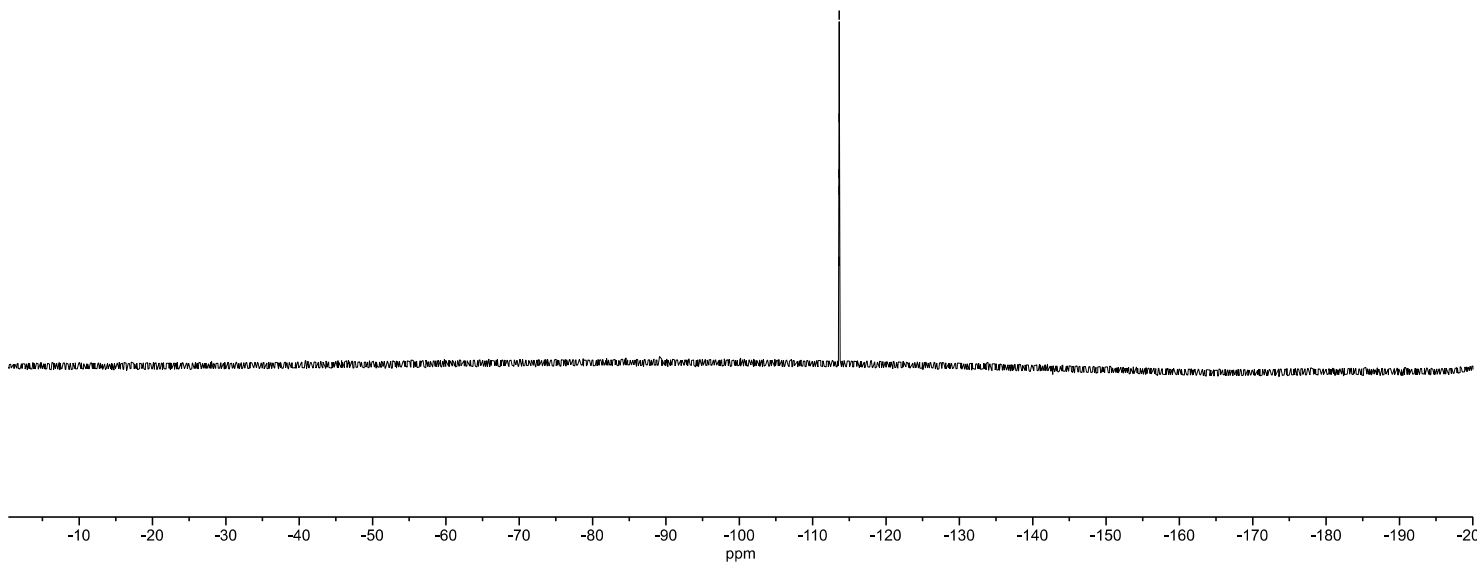

7.479  
7.472  
7.467  
7.456  
7.451  
7.444  
7.430  
7.287  
7.279  
7.274  
7.260  
7.259  
7.257  
CDCl<sub>3</sub>

4.262  
4.244  
4.212  
4.209  
4.195  
4.194  
4.191  
4.176  
4.174  
4.159  
4.156

2.424  
2.406  
2.384  
2.365  
2.361  
2.342  
2.027  
2.021  
2.003  
2.000  
1.984  
1.975  
1.958  
1.635  
1.618  
1.611  
1.595  
1.582  
1.329  
1.312  
1.294  
1.276  
1.251

**5o.** Ethyl (1R,2S)-2-acetoxy-2-(4-bromophenyl)cyclopropane-1-carboxylate  
<sup>1</sup>H NMR (500 MHz, CDCl<sub>3</sub>)

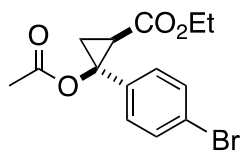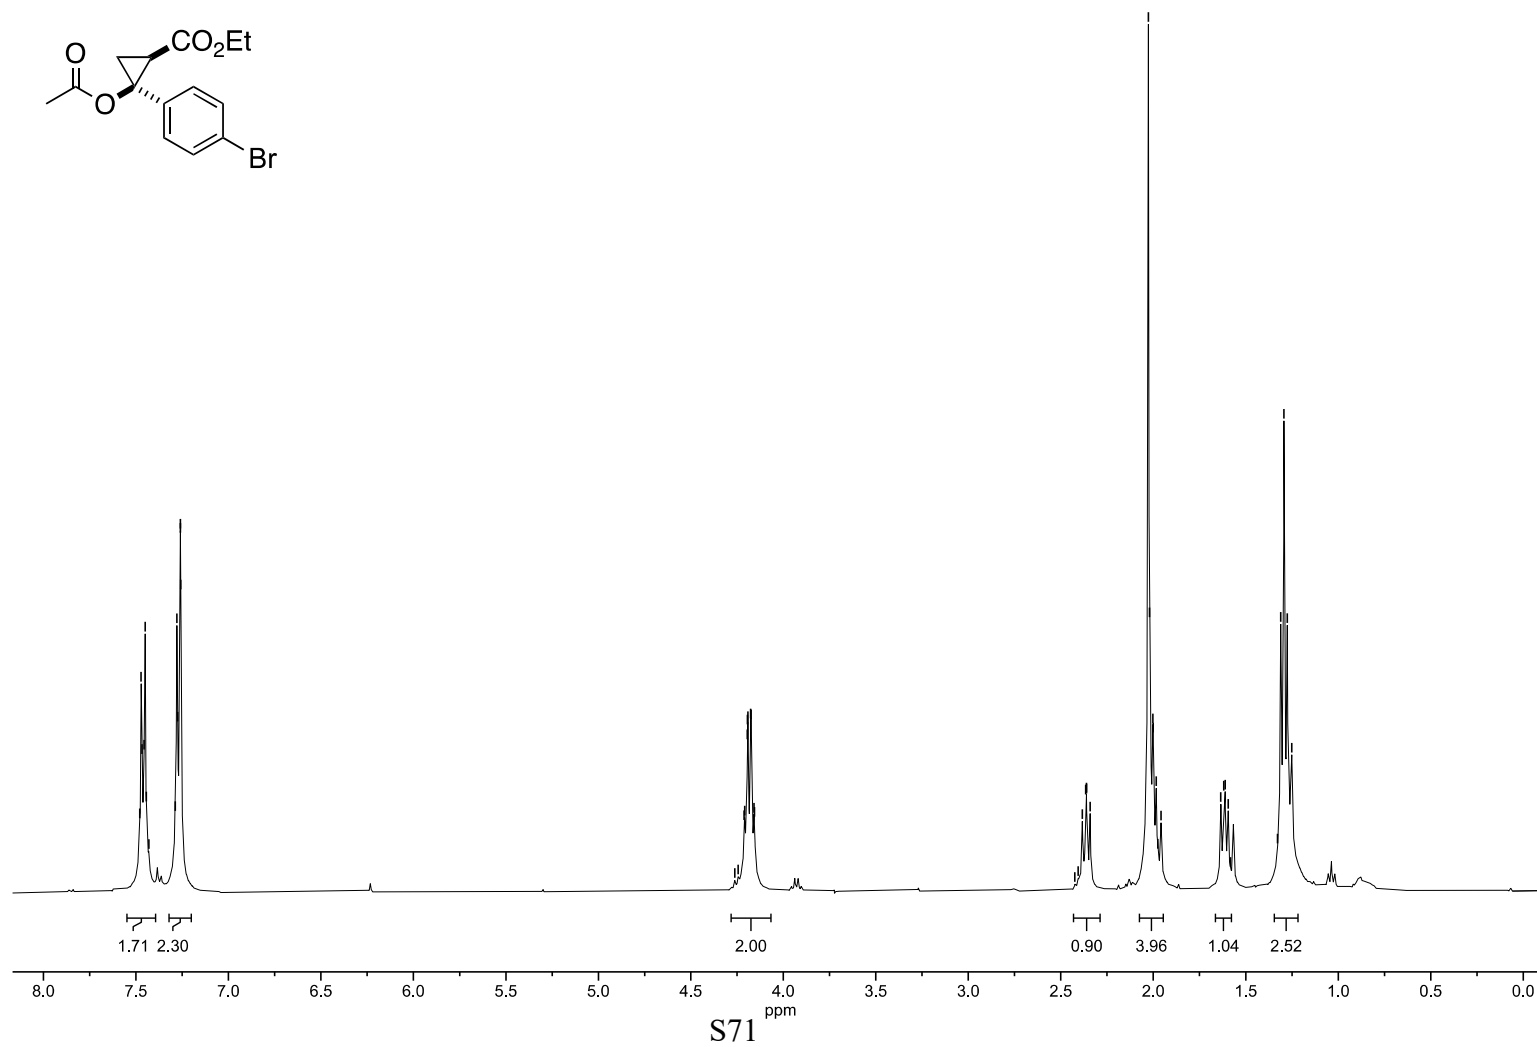

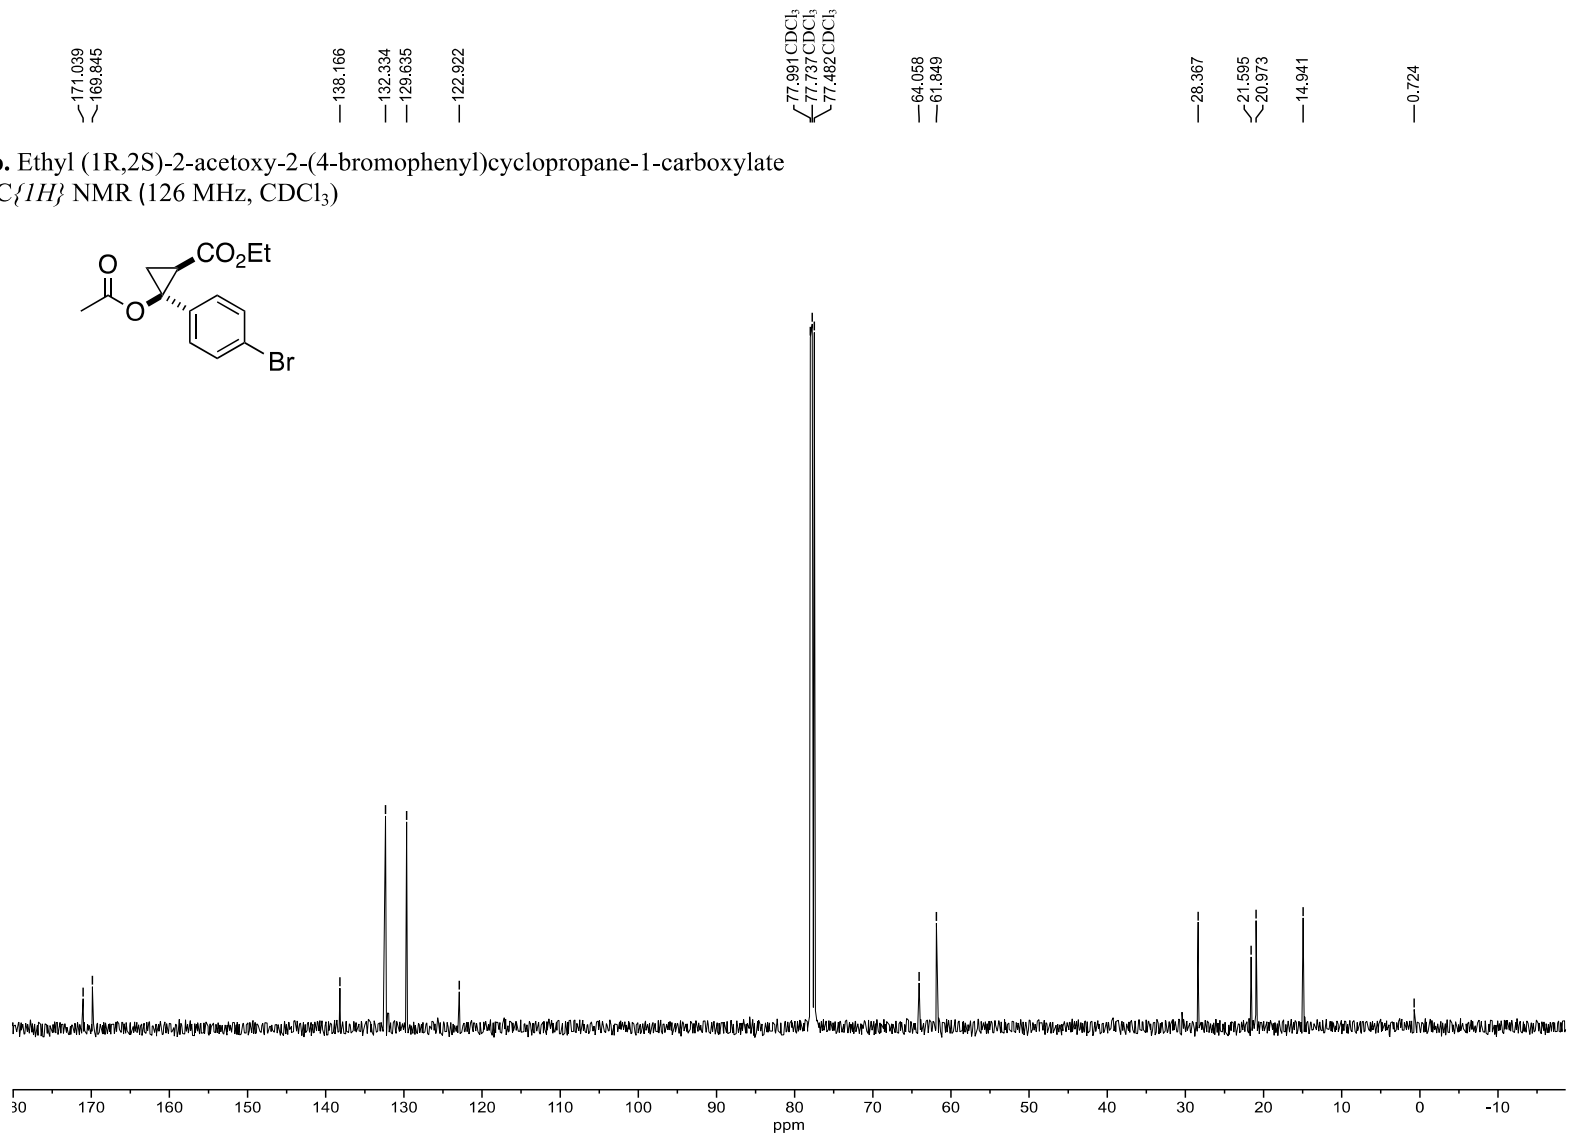



$\delta$  7.609, 7.589, 7.467, 7.262 CDCl<sub>3</sub>  
**5p.** Ethyl (1R,2S)-2-acetoxy-2-(4-(trifluoromethyl)phenyl)cyclopropane-1-carboxylate  
<sup>1</sup>H NMR (500 MHz, CDCl<sub>3</sub>)

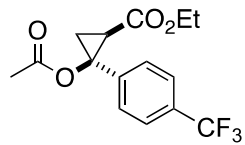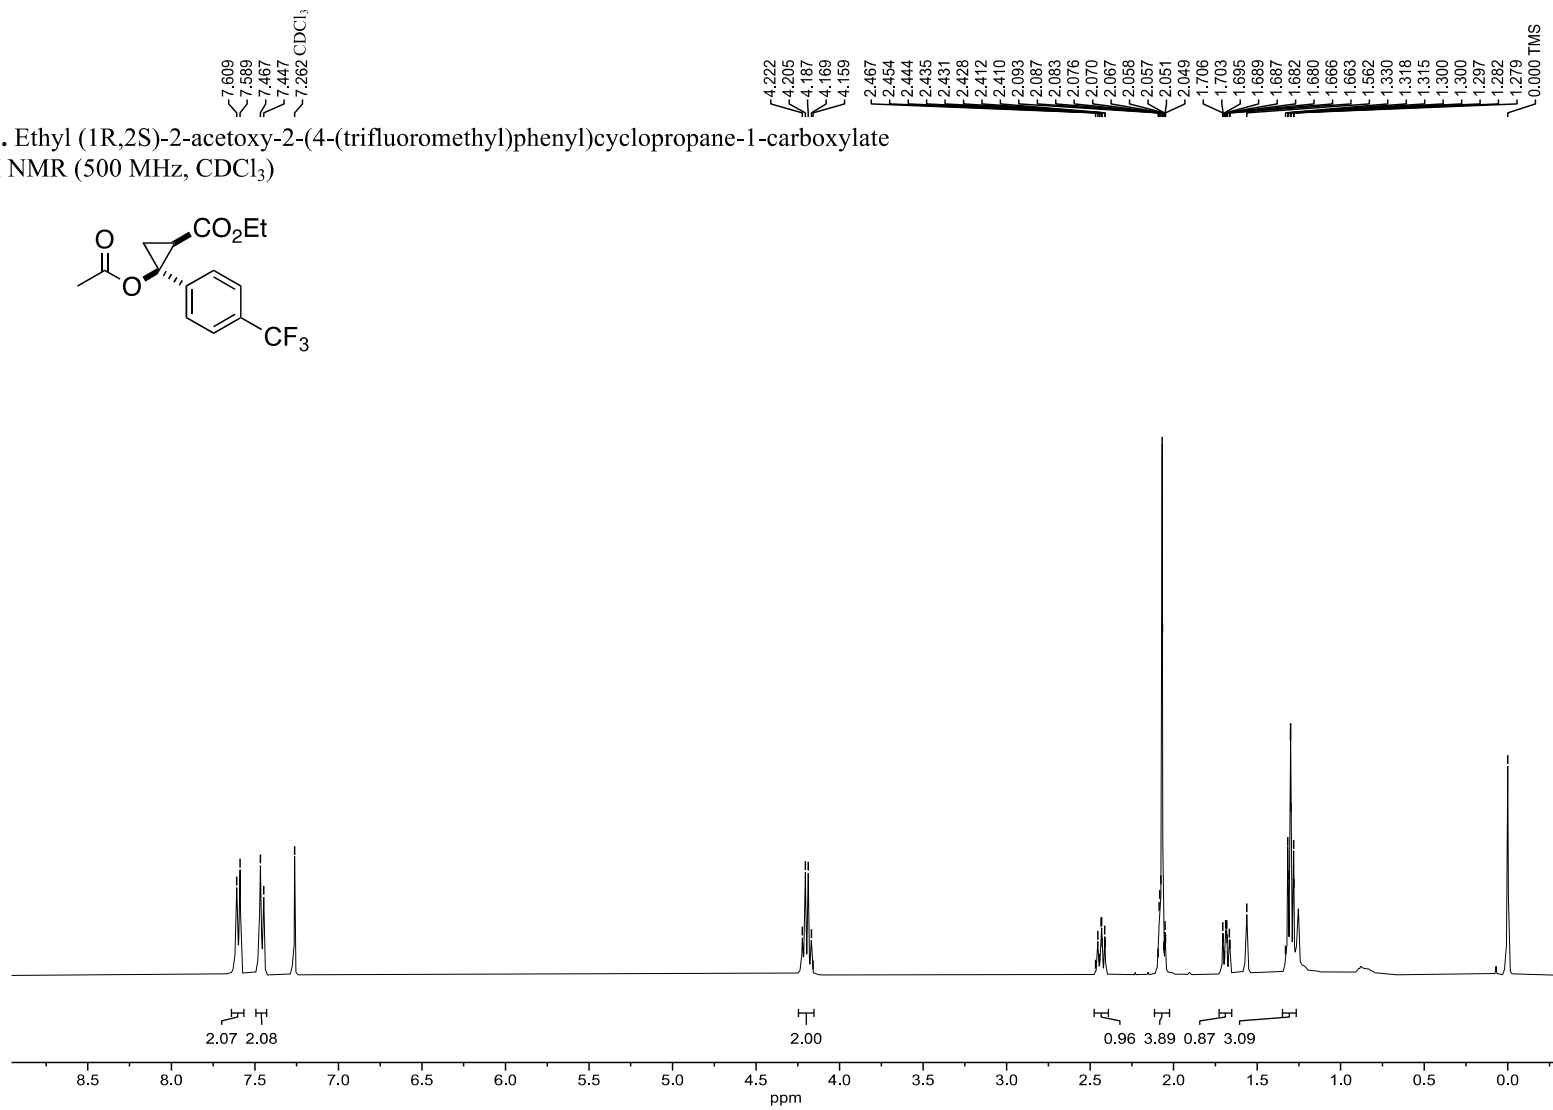

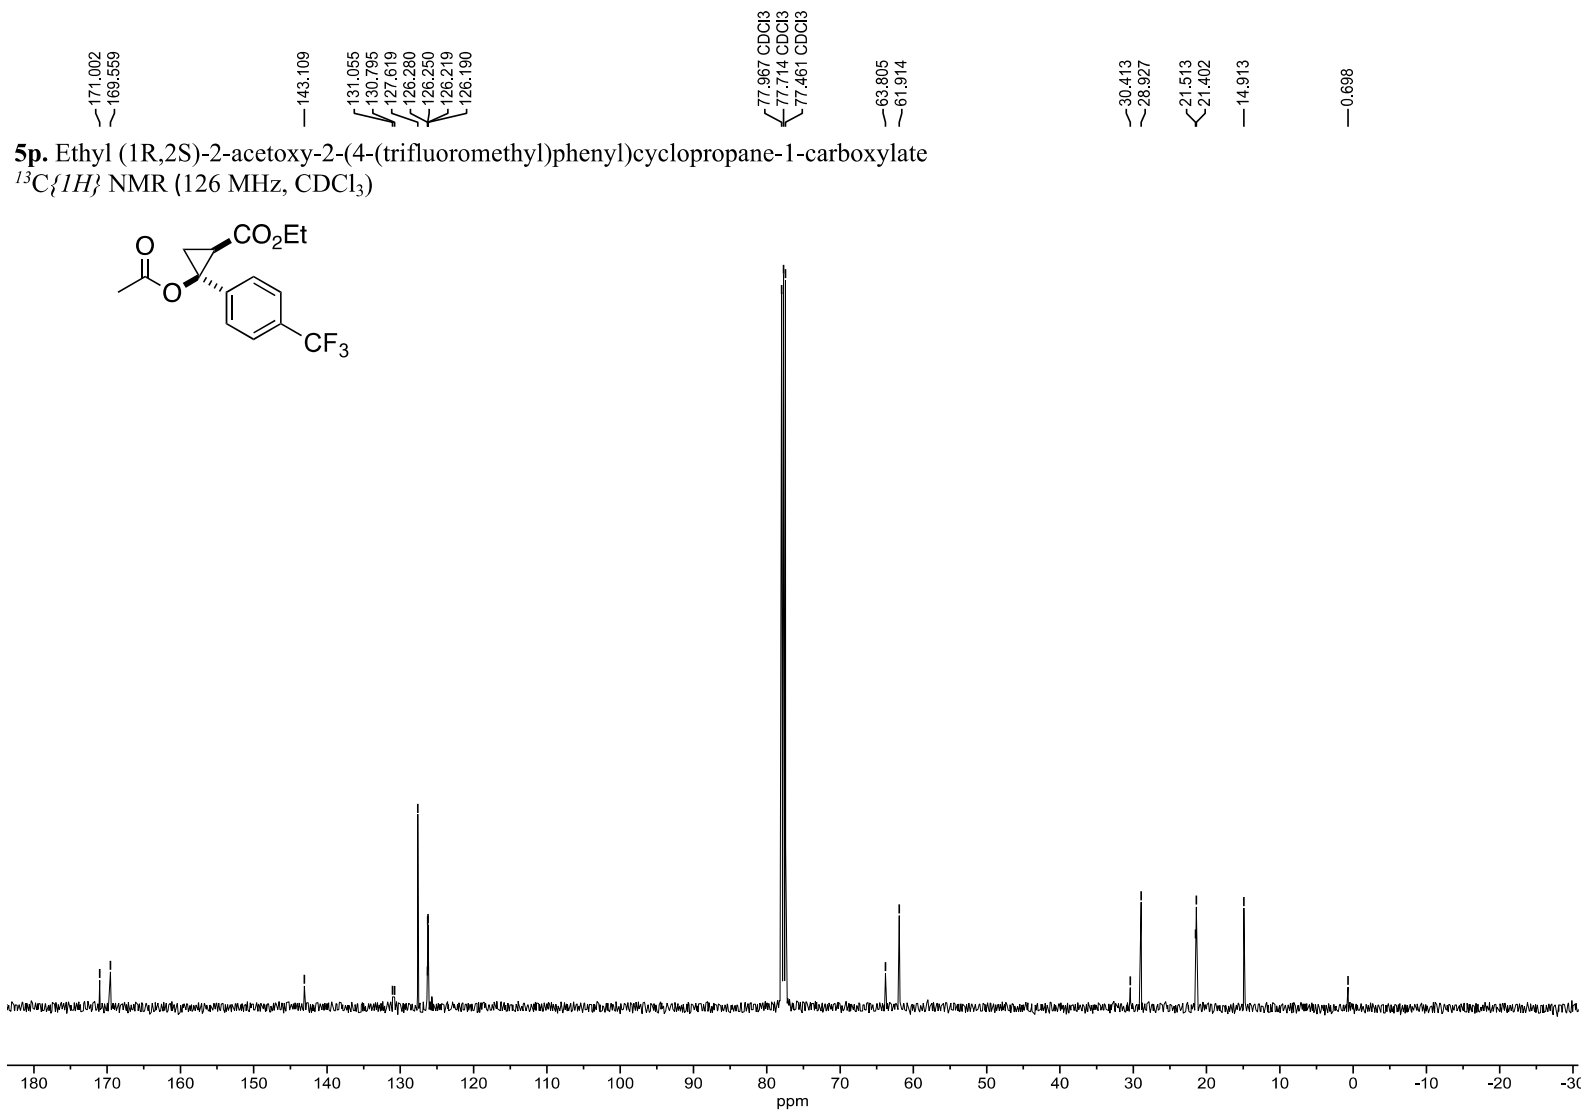

**5p.** Ethyl (1R,2S)-2-acetoxy-2-(4-(trifluoromethyl)phenyl)cyclopropane-1-carboxylate  
<sup>19</sup>F NMR 376 MHz

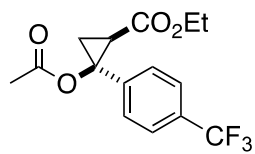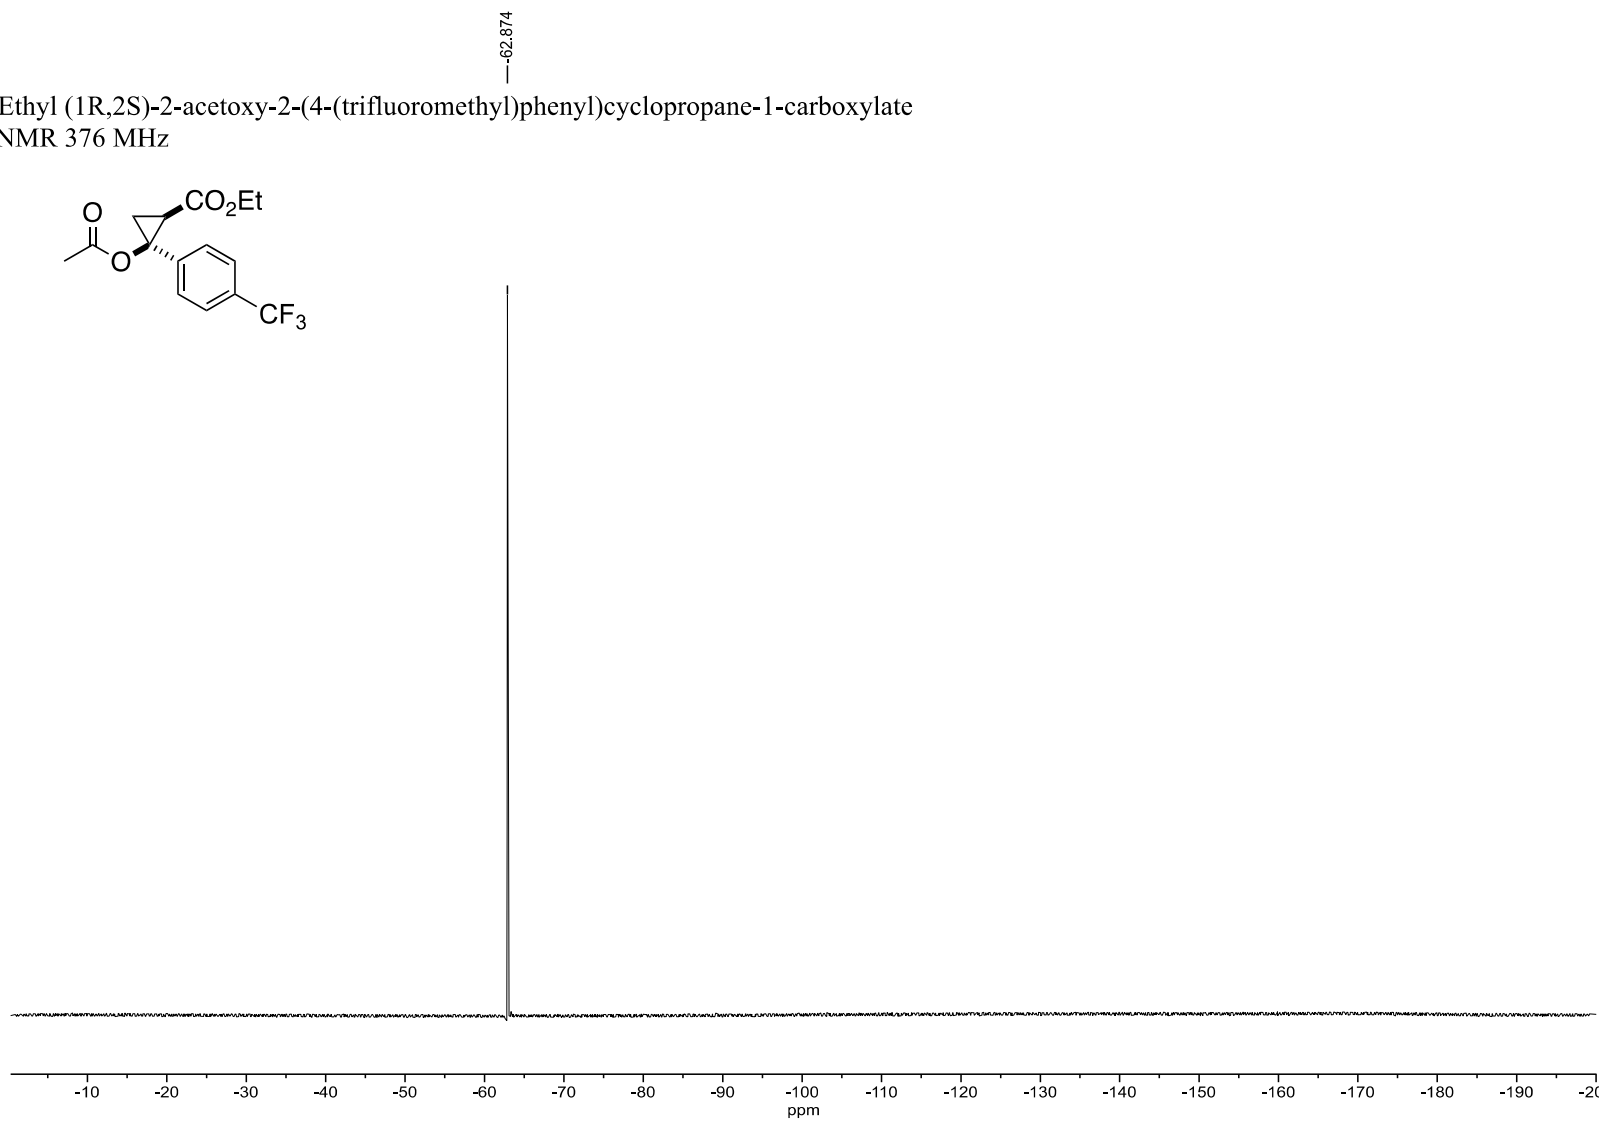

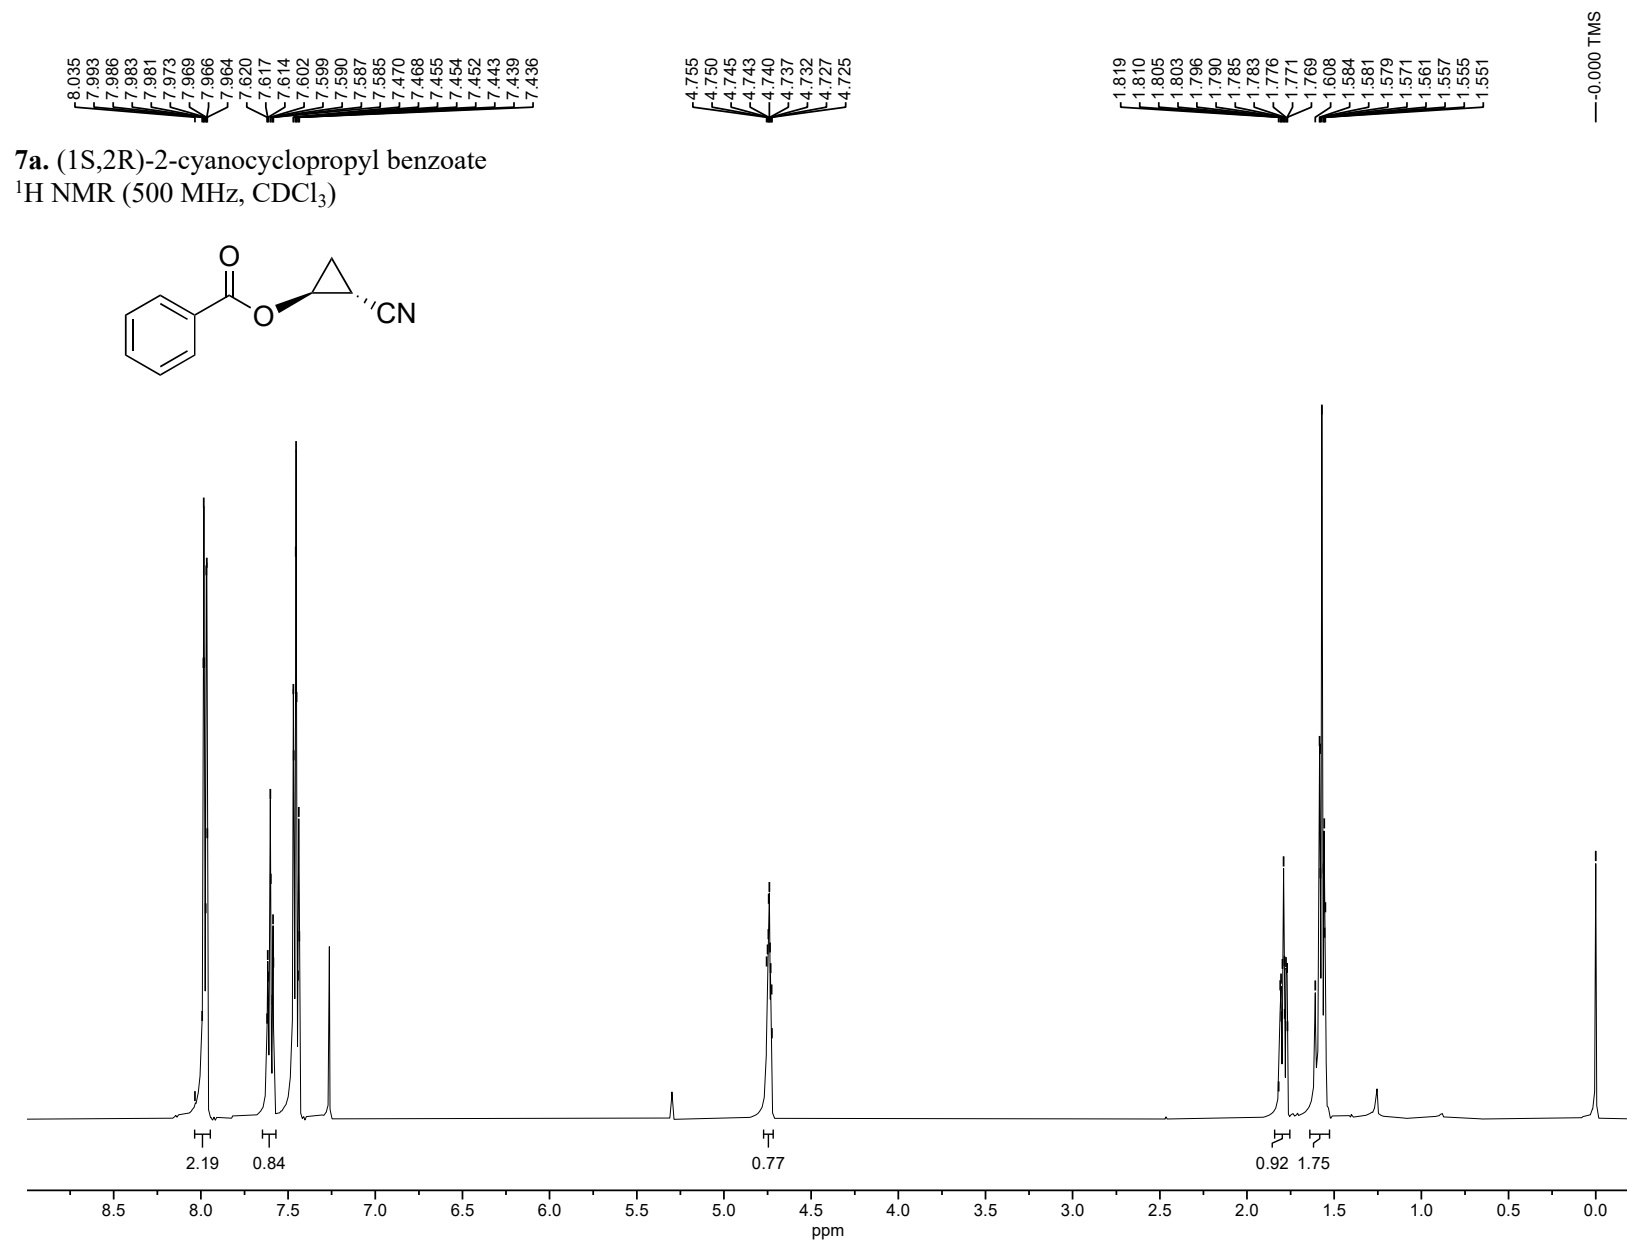

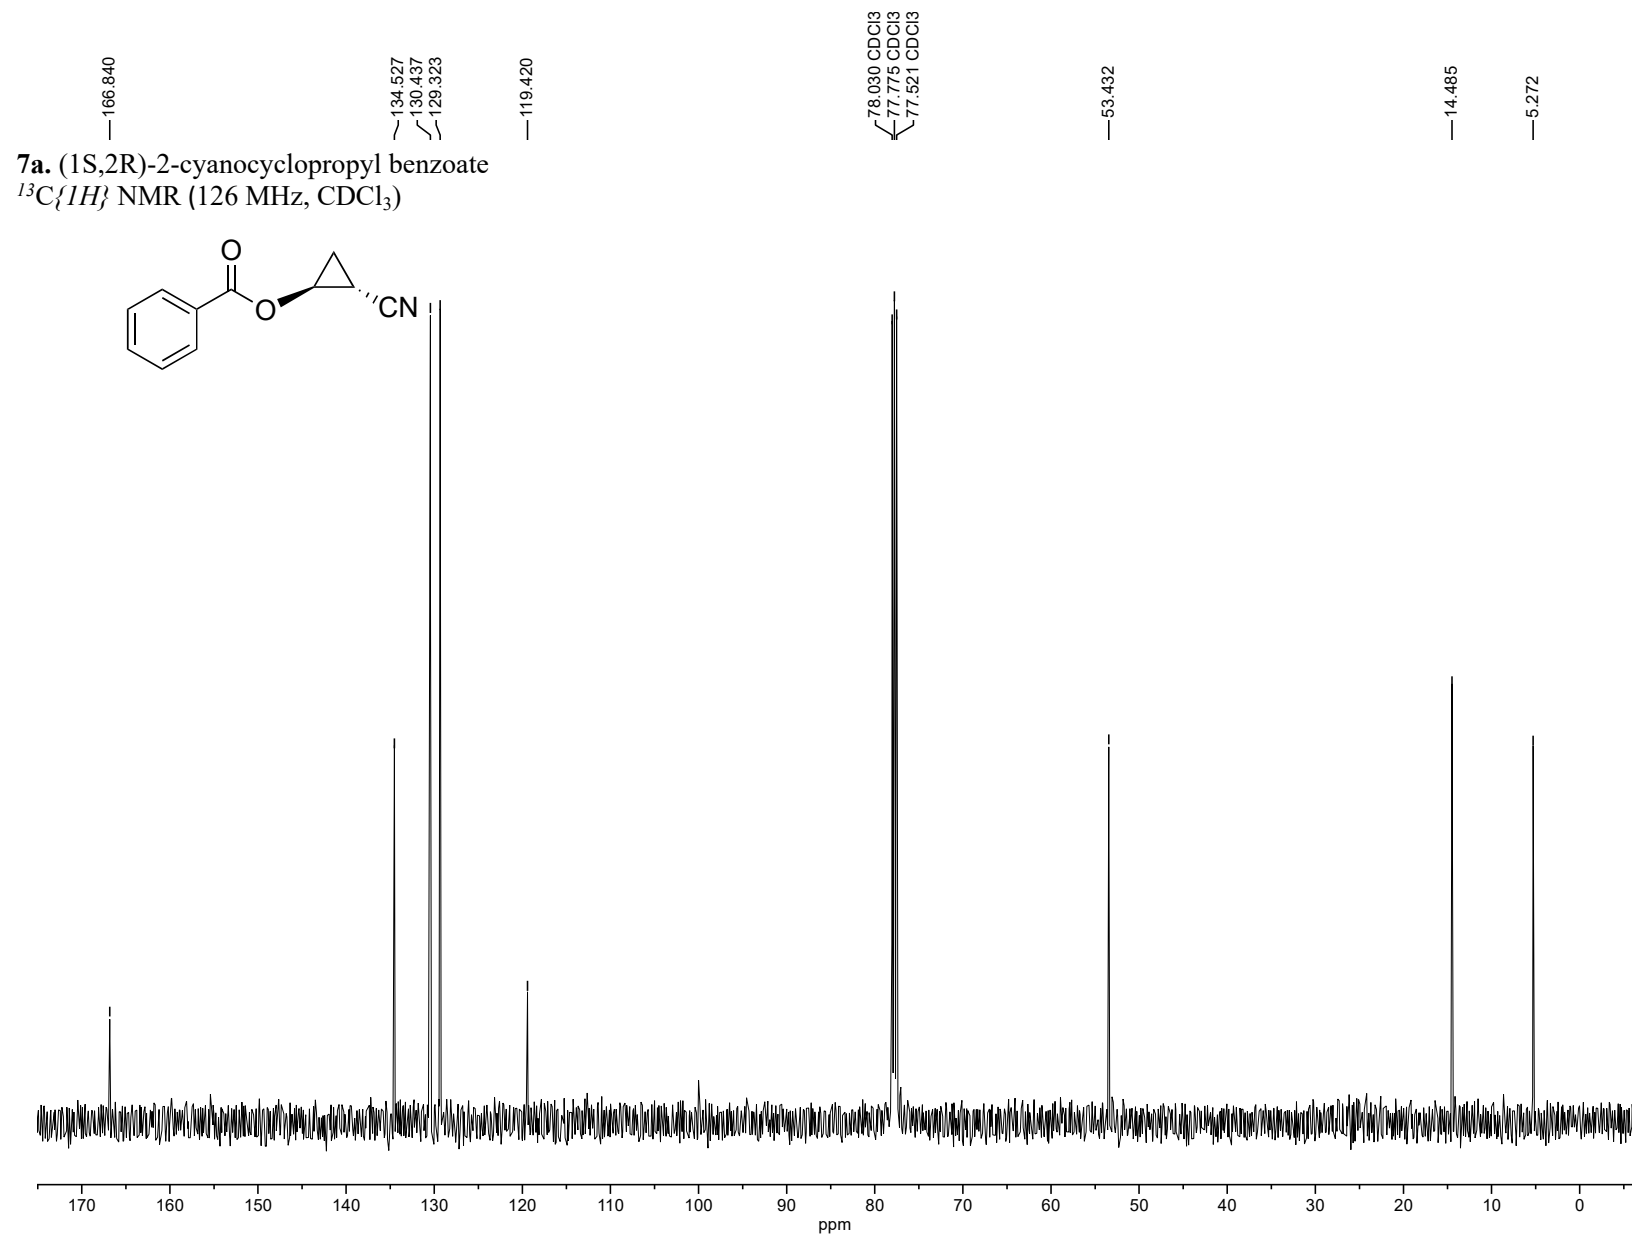

11. (1R,2R)-2-hydroxy-2-isopropylcyclopropane-1-carboxylic acid  
<sup>1</sup>H NMR (500 MHz, CDCl<sub>3</sub>)

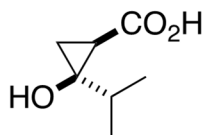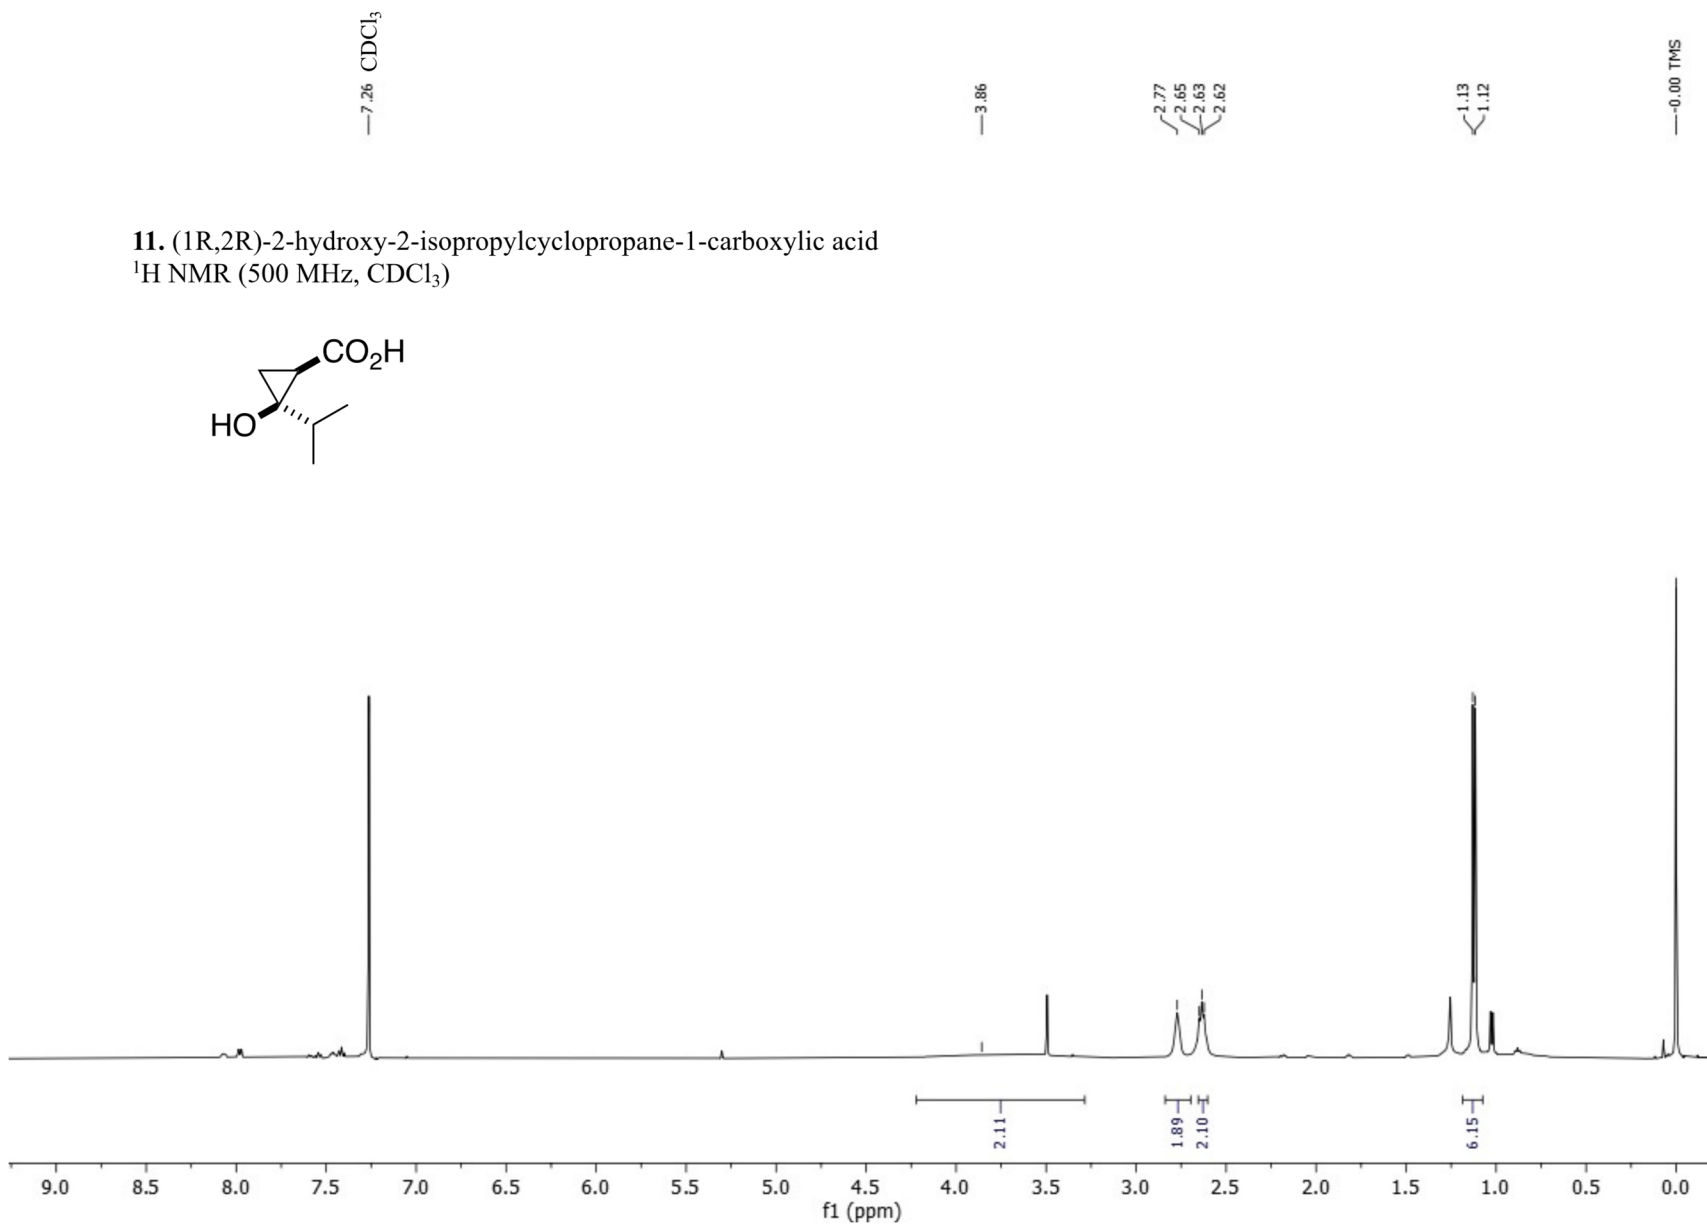

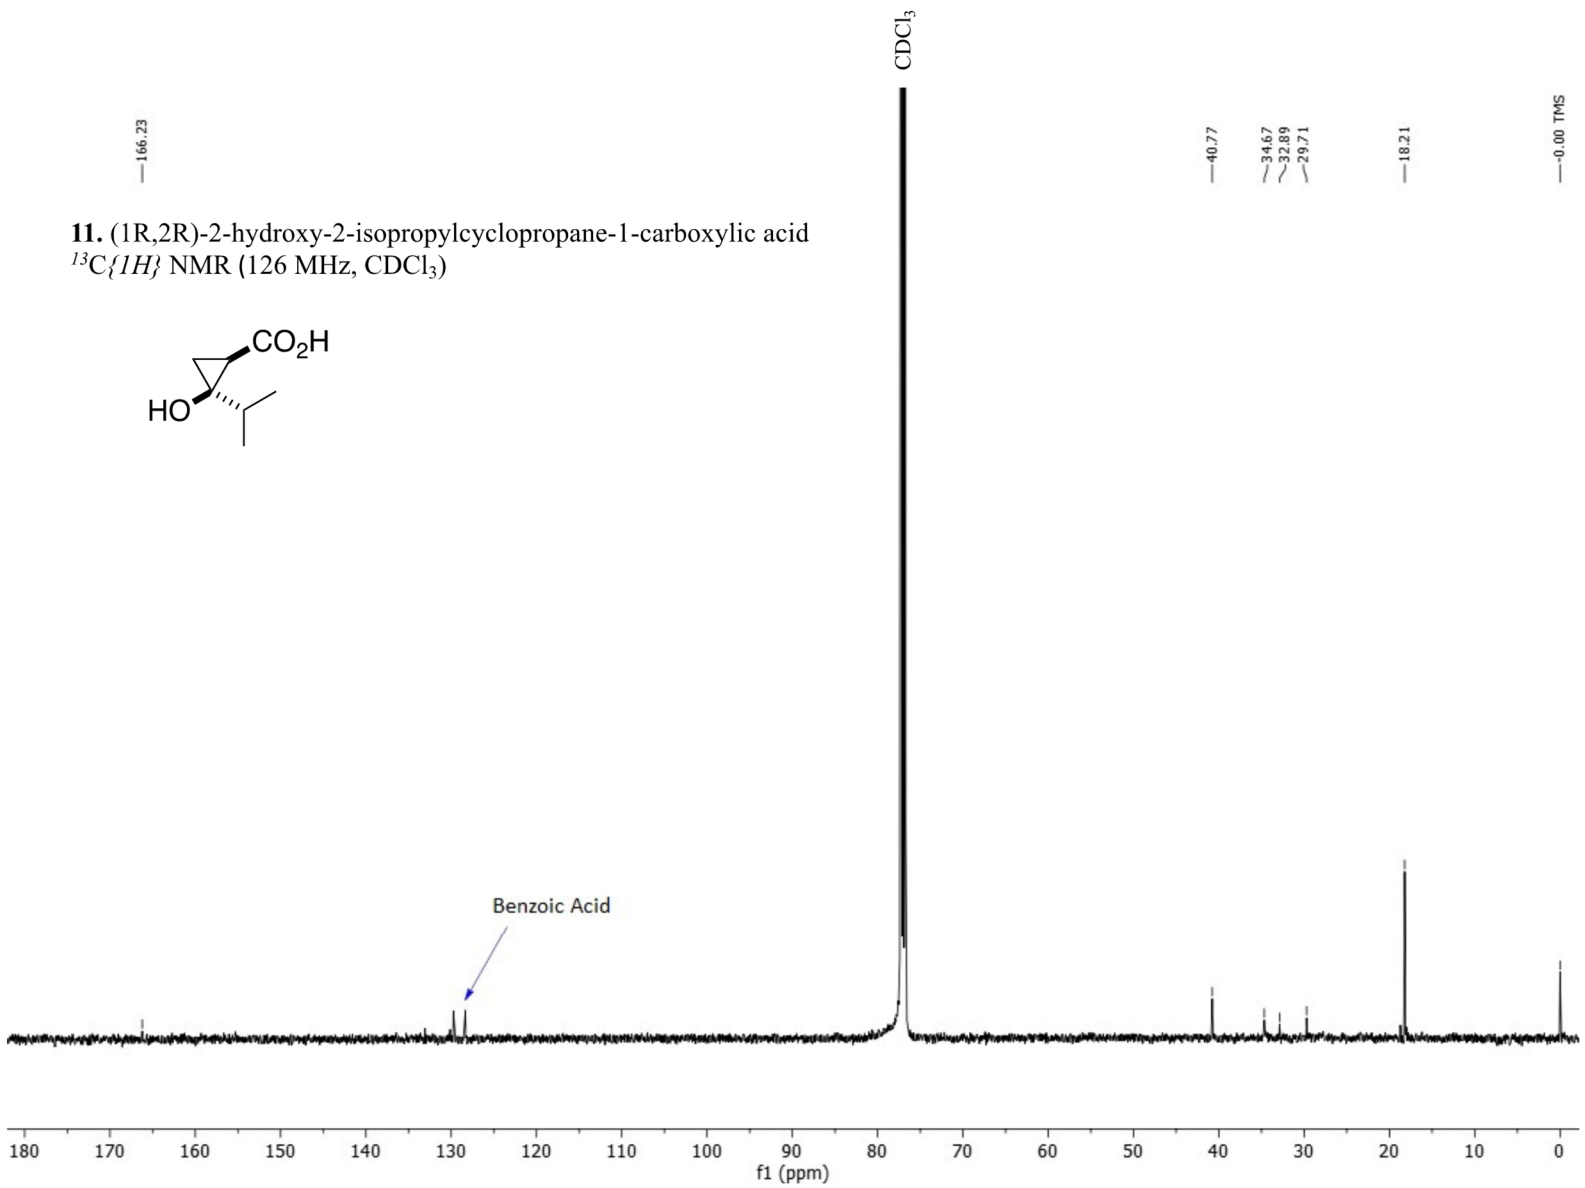

## References

1. Martinez-Montero, S.; Fernandez, S.; Sanghvi, Y. S.; Gotor, V.; Ferrero, M. An Expedient Biocatalytic Procedure for Abasic Site Precursors Useful in Oligonucleotide Synthesis. *Org. Biomol. Chem.* **2011**, *9*, 5960-5966
2. Goossen, L. J.; Paetzold, J.; Koley, D. Regiocontrolled Ru-Catalyzed Addition of Carboxylic Acids to Alkynes: Practical Protocols for the Synthesis of Vinyl Esters. *Chem. Commun.* **2003**, 706-707.
3. Li, W. P.; Zhu, Y. C.; Zhou, Y. J.; Yang, H. W.; Zhu, C. J. Visible Light Induced C-H Monofluoroalkylation to Synthesize 1,4-Unsaturated Compound. *Tetrahedron* **2019**, *75*, 1647-1651.
4. Sreenilayam, G.; Fasan, R. Myoglobin-Catalyzed Intermolecular Carbene N-H Insertion with Arylamine Substrates. *Chem. Commun.* **2015**, *51*, 1532-1534.
5. Tyagi, V.; Bonn, R. B.; Fasan, R. Intermolecular Carbene S-H Insertion Catalysed by Engineered Myoglobin-Based Catalysts. *Chem. Sci.* **2015**, *6*, 2488-2494.
6. Tyagi, V.; Sreenilayam, G.; Bajaj, P.; Tinoco, A.; Fasan, R. Biocatalytic Synthesis of Allylic and Allenyl Sulfides through a Myoglobin-Catalyzed Doyle-Kirmse Reaction. *Angew. Chem. Int. Ed.* **2016**, *55*, 13562-13566.
